# Supplementary material
Source: publisher figshare collection journal article supplement (https://gsajournals.figshare.com/ndownloader/files/12264296)
Supplement: Supplementary file 1 [file 12264296]

## Sheet: Table S1
Hermaphrodite transcript counts
						Gonad # 1										Gonad # 2
Open reading frame	1	2	3	4	5	6	7	8	9	10	1	2	3	4	5	6	7	8	9	10	WBGene
2L52.1	0	0	0	0	0	2	1	0	0	0	0	0	0	0	0	1	0	0	0	0	WBGene00007063
2RSSE.1	0	0	0	0	0	0	0	0	0	0	0	0	0	0	0	0	0	0	0	0	WBGene00007064
2RSSE.2	0	0	0	0	0	0	0	0	0	0	0	0	0	0	0	0	0	0	0	0	WBGene00044165
3R5.1	0	7	12	16	9	9	0	2	2	2	2	9	9	8	9	6	1	1	1	1	WBGene00007065
4R79.1	0	0	0	0	0	0	0	0	0	0	0	0	0	0	0	0	0	0	0	0	WBGene00003525
4R79.2	0	0	0	0	0	0	0	0	0	0	0	0	0	0	0	0	0	0	0	0	WBGene00007067
6R55.2	0	0	0	0	0	0	0	0	0	0	0	0	0	0	0	0	0	0	0	0	WBGene00007069
AC3.1	0	0	0	0	0	0	0	0	0	0	0	0	0	0	0	0	0	0	0	0	WBGene00005532
AC3.10	0	0	0	0	0	0	0	0	0	0	0	0	0	0	0	0	0	0	0	0	WBGene00004964
AC3.12	0	0	0	0	0	0	0	0	0	0	0	0	0	0	0	0	0	0	0	0	WBGene00077503
AC3.2	0	0	1	0	0	0	0	0	0	0	0	0	0	0	0	0	0	0	0	2	WBGene00007070
AC3.3	0	0	0	0	0	0	0	0	0	0	0	0	0	0	0	0	0	0	0	0	WBGene00000024
AC3.4	0	0	0	0	0	0	0	0	0	0	0	0	0	0	0	0	0	0	0	0	WBGene00004098
AC3.5	0	0	0	0	0	0	0	0	0	0	0	0	0	0	0	0	0	0	0	0	WBGene00007071
AC3.6	0	0	0	0	0	0	0	0	0	0	0	0	0	0	0	0	0	0	0	0	WBGene00000724
AC3.7	0	0	0	0	0	0	0	0	0	0	0	0	0	0	0	0	0	0	0	0	WBGene00007072
AC3.8	0	0	0	0	0	0	0	0	0	0	0	0	0	0	0	0	0	0	0	0	WBGene00007073
AC7.1	0	0	0	0	0	0	0	0	0	0	0	0	0	0	0	0	0	0	0	0	WBGene00006428
AC7.2	0	0	2	1	0	21	0	3	3	10	1	0	0	1	7	8	8	3	7	2	WBGene00004929
AC7.3	0	0	0	0	0	0	0	0	0	0	0	0	0	0	0	0	0	0	0	0	WBGene00014997
AC8.10	0	0	0	0	0	0	0	0	0	0	0	0	0	0	0	0	0	0	0	0	WBGene00043988
AC8.11	0	0	0	0	0	0	0	0	0	0	0	0	0	0	0	0	0	0	1	0	WBGene00043989
AC8.12	0	0	0	0	0	1	0	0	0	0	0	0	0	0	0	0	0	0	0	0	WBGene00043990
AC8.3	0	0	0	0	0	0	0	0	0	0	0	0	0	0	0	0	0	0	0	0	WBGene00007075
AC8.4	0	0	0	0	0	0	0	0	0	0	0	0	0	0	0	0	0	0	1	0	WBGene00007076
AC8.7	0	0	0	0	0	1	0	0	0	0	0	0	0	0	0	0	0	0	0	0	WBGene00007079
AH10.1	0	0	0	0	0	0	0	0	0	0	0	0	0	0	0	0	0	0	0	0	WBGene00007082
AH10.2	0	0	0	0	0	0	0	0	0	0	0	0	0	0	0	0	0	0	0	0	WBGene00007083
AH10.3	0	0	0	0	0	0	0	0	0	0	0	0	0	0	0	0	0	0	0	0	WBGene00007084
AH10.4	0	0	1	0	0	0	0	0	0	0	0	0	0	0	1	0	0	0	0	0	WBGene00007085
AH6.1	0	0	0	0	0	0	0	0	0	0	0	0	0	0	0	0	0	0	0	0	WBGene00001528
AH6.10	0	0	0	0	0	0	0	0	0	0	0	0	0	0	0	0	0	0	0	0	WBGene00005032
AH6.11	0	0	0	0	0	0	0	0	0	0	0	0	0	0	0	0	0	0	0	0	WBGene00005033
AH6.12	0	0	0	0	0	0	0	0	0	0	0	0	0	0	0	0	0	0	0	0	WBGene00005034
AH6.14	0	0	0	0	0	0	0	0	0	0	0	0	0	0	0	0	0	0	0	0	WBGene00005035
AH6.17	0	0	0	0	0	0	0	0	0	0	0	0	0	0	0	0	0	0	0	0	WBGene00219290
AH6.2	0	0	0	0	0	0	0	0	0	0	0	0	0	0	0	0	0	0	0	0	WBGene00007080
AH6.3	0	0	0	0	0	0	0	0	0	0	0	0	0	0	0	0	0	0	0	0	WBGene00007081
AH6.4	0	0	0	0	0	0	0	0	0	0	0	0	0	0	0	0	0	0	0	0	WBGene00005027
AH6.5	3	10	27	77	217	156	22	26	49	134	3	11	28	60	171	86	41	21	51	30	WBGene00003231
AH6.6	0	0	0	0	0	0	0	0	0	0	0	0	0	0	0	0	0	0	0	0	WBGene00005028
AH6.7	0	0	0	0	0	0	0	0	0	0	0	0	0	0	0	0	0	0	0	0	WBGene00005029
AH6.8	0	0	0	0	0	0	0	0	0	0	0	0	0	0	0	0	0	0	0	0	WBGene00005030
AH9.1	0	0	0	0	0	0	0	0	1	0	0	0	0	0	0	0	0	0	0	0	WBGene00014998
AH9.2	0	0	0	0	0	19	9	1	7	20	0	0	0	0	5	10	3	2	1	2	WBGene00000797
AH9.3	0	0	0	0	0	14	2	3	8	26	0	0	1	0	1	12	4	6	11	7	WBGene00014999
AH9.4	0	0	0	0	0	0	0	0	0	0	0	0	0	0	0	0	0	0	0	0	WBGene00015000
AH9.6	0	0	0	0	0	0	0	0	0	0	0	0	0	0	0	0	0	0	0	0	WBGene00044701
AH9.7	0	0	0	0	0	0	0	0	0	0	0	0	0	0	0	0	1	0	0	0	WBGene00175029
B0001.1	3	34	57	86	79	51	7	14	22	55	2	14	50	55	46	23	13	6	11	8	WBGene00003010
B0001.2	16	28	51	64	86	58	6	6	16	31	12	25	49	68	90	32	11	4	20	12	WBGene00007087
B0001.3	0	25	21	43	44	32	6	3	4	14	4	8	24	22	23	21	6	6	7	3	WBGene00007088
B0001.4	10	36	59	63	73	60	5	10	23	39	20	23	24	64	45	22	20	4	6	6	WBGene00007089
B0001.5	2	17	18	19	26	21	6	4	1	7	4	10	20	14	16	13	5	4	3	2	WBGene00007090
B0001.6	0	0	1	0	0	14	5	3	11	19	0	0	0	0	3	10	9	5	11	3	WBGene00007091
B0001.7	5	16	26	54	64	37	1	7	15	35	13	13	17	30	57	16	7	9	11	2	WBGene00007092
B0001.8	1	15	18	28	33	25	4	5	6	33	4	14	15	23	27	14	9	2	6	4	WBGene00007093
B0019.1	0	0	0	0	0	0	0	0	0	0	0	0	0	0	0	0	0	0	0	0	WBGene00000138
B0019.2	2	5	16	14	9	9	2	1	4	7	1	5	9	6	16	13	5	3	5	2	WBGene00007094
B0024.1	0	0	0	0	0	0	0	0	0	0	0	0	0	0	0	0	0	0	0	0	WBGene00000722
B0024.10	10	11	39	65	50	32	5	7	16	34	6	13	29	34	47	12	14	4	5	2	WBGene00007100
B0024.11	10	45	24	38	50	29	8	8	12	11	10	24	24	32	51	24	11	4	7	2	WBGene00007101
B0024.12	0	0	2	2	1	1	0	1	1	1	2	0	0	0	1	1	0	1	0	0	WBGene00001646
B0024.13	1	21	32	51	68	48	5	3	16	27	2	15	19	18	52	30	24	12	16	7	WBGene00007102
B0024.14	0	0	0	0	0	1	0	0	0	0	0	0	0	1	0	0	0	0	0	0	WBGene00007103
B0024.15	0	0	0	0	0	0	0	0	0	0	0	0	0	0	0	0	0	0	0	0	WBGene00007104
B0024.2	0	0	0	0	0	0	0	0	0	0	0	0	0	0	0	0	0	0	0	0	WBGene00000723
B0024.3	0	0	1	0	0	0	0	0	0	0	0	0	0	0	0	0	0	0	0	0	WBGene00007096
B0024.4	0	0	0	0	0	0	0	0	0	0	0	0	0	0	0	0	0	0	0	0	WBGene00007097
B0024.6	0	0	0	0	0	0	0	0	0	0	0	0	0	0	0	0	0	0	0	0	WBGene00001533
B0024.8	0	0	0	0	0	0	0	0	1	0	0	0	0	0	0	0	0	0	0	0	WBGene00000491
B0024.9	15	62	79	98	104	60	5	3	11	17	18	30	54	99	75	29	16	12	12	9	WBGene00007099
B0025.1	1	6	13	11	16	8	0	4	4	5	1	3	7	14	5	10	1	3	3	1	WBGene00006932
B0025.2	16	21	24	41	57	44	4	7	9	30	3	10	21	43	37	17	9	6	13	17	WBGene00000814
B0025.4	3	10	16	28	26	22	4	1	7	17	2	5	14	16	21	9	6	2	4	3	WBGene00015001
B0025.5	0	0	0	0	0	0	0	0	0	0	0	0	0	0	0	0	0	0	0	0	WBGene00194700
B0034.1	0	0	0	0	0	0	0	0	0	0	0	0	0	0	0	0	0	0	0	0	WBGene00015002
B0034.2	0	0	0	0	0	0	0	0	0	0	0	0	0	0	0	0	0	0	0	0	WBGene00015003
B0034.3	1	0	2	3	2	3	4	4	7	6	0	0	0	1	2	5	2	6	7	6	WBGene00000403
B0034.4	0	0	0	0	0	0	0	0	0	0	0	0	0	0	0	0	0	0	0	0	WBGene00015004
B0034.5	0	0	0	0	0	0	0	0	0	0	0	0	0	0	0	0	0	0	0	0	WBGene00015005
B0034.7	0	0	0	0	0	0	0	0	0	0	0	0	1	0	0	0	0	0	0	1	WBGene00044394
B0035.1	18	52	82	120	137	94	18	10	39	82	20	40	64	68	97	84	34	13	22	16	WBGene00007105
B0035.10	0	0	2	6	12	9	0	0	0	1	1	0	2	2	2	2	1	0	0	1	WBGene00001919
B0035.11	5	26	39	47	84	49	9	5	10	43	13	17	39	40	67	33	19	6	9	3	WBGene00007110
B0035.12	15	53	44	73	105	48	10	12	12	33	16	12	27	53	56	21	10	11	13	13	WBGene00007111
B0035.13	0	0	0	1	0	0	1	0	0	0	0	0	1	0	1	0	0	0	0	0	WBGene00007112
B0035.14	7	13	30	42	56	40	3	3	9	24	4	4	28	18	41	30	7	7	14	7	WBGene00001019
B0035.15	13	26	30	52	47	44	3	7	10	24	11	13	31	48	41	22	10	11	8	9	WBGene00007113
B0035.16	0	6	3	8	8	3	0	1	4	5	1	6	7	3	6	0	0	0	0	0	WBGene00007114
B0035.18	6	8	10	8	13	7	0	1	0	8	5	4	5	14	9	11	6	1	4	1	WBGene00044290
B0035.2	0	4	13	15	20	22	2	1	4	16	3	7	7	12	17	10	5	4	6	1	WBGene00001020
B0035.3	11	35	48	56	88	58	7	5	10	43	9	20	35	48	53	35	22	5	15	13	WBGene00007106
B0035.4	15	40	54	53	60	42	6	5	12	26	19	19	38	82	64	21	8	10	8	6	WBGene00007107
B0035.5	3	12	30	23	30	23	1	4	3	21	4	9	19	18	28	8	4	0	8	7	WBGene00007108
B0035.6	29	62	92	119	168	102	19	25	45	121	16	44	74	86	149	84	49	30	51	28	WBGene00007109
B0035.7	0	3	2	3	7	6	1	1	0	5	1	0	4	4	4	0	4	0	2	0	WBGene00001921
B0035.8	2	10	21	31	36	26	4	8	10	18	2	3	12	17	24	10	4	0	2	1	WBGene00001922
B0035.9	0	0	6	11	13	10	0	1	3	10	1	2	3	7	5	0	0	0	1	1	WBGene00001920
B0041.1	0	0	0	0	0	0	0	0	0	0	0	0	0	0	0	0	0	0	0	0	WBGene00015006
B0041.11	0	1	0	1	0	1	1	0	0	4	0	0	0	0	0	4	4	1	2	2	WBGene00206362
B0041.2	2	5	7	4	9	3	0	0	2	2	0	1	3	3	9	4	0	1	4	0	WBGene00015007
B0041.3	0	0	0	1	0	7	1	1	0	3	0	0	0	0	3	2	1	0	1	0	WBGene00015008
B0041.4	360	735	815	796	849	636	121	51	72	59	456	510	721	851	683	354	123	16	23	11	WBGene00004415
B0041.5	0	8	9	22	16	21	4	4	5	14	0	6	27	20	37	15	7	3	4	6	WBGene00015009
B0041.6	0	2	0	0	0	1	1	1	0	0	0	1	0	0	0	1	0	0	0	0	WBGene00015010
B0041.7	10	39	54	48	64	55	13	2	13	27	14	26	33	55	68	39	11	10	20	4	WBGene00006961
B0041.8	8	39	59	94	112	81	9	13	21	59	11	21	56	52	57	38	8	10	10	7	WBGene00015011
B0047.1	3	3	1	1	1	1	0	0	0	0	0	0	0	0	0	1	0	0	0	0	WBGene00015012
B0047.2	1	4	0	1	5	4	1	0	0	1	0	2	1	0	1	0	0	0	0	0	WBGene00015013
B0047.3	5	4	3	7	9	5	0	0	0	0	1	1	7	7	8	3	0	0	0	0	WBGene00015014
B0047.4	0	0	0	0	1	0	0	0	0	0	0	0	0	0	0	1	0	0	0	0	WBGene00015015
B0198.1	0	0	0	1	0	1	0	0	0	0	0	0	0	0	0	0	2	0	0	0	WBGene00006646
B0198.2	0	0	0	0	0	0	0	0	0	0	0	0	0	0	0	0	0	0	0	0	WBGene00007115
B0198.3	0	0	0	0	0	0	1	1	0	0	0	0	0	0	0	0	0	0	0	0	WBGene00007116
B0205.1	12	24	32	42	56	35	7	7	6	28	10	10	27	40	53	33	17	7	11	14	WBGene00015017
B0205.10	0	0	0	0	0	0	0	0	0	0	0	0	0	0	0	0	0	0	0	0	WBGene00015024
B0205.11	28	79	117	154	151	57	11	5	16	29	29	32	81	119	98	21	11	5	10	6	WBGene00015025
B0205.12	3	7	25	17	23	10	1	1	1	5	3	4	10	6	7	4	2	0	0	0	WBGene00044413
B0205.13	0	0	0	0	0	0	0	0	0	0	0	0	0	1	0	0	0	0	0	0	WBGene00044644
B0205.14	0	0	0	0	0	0	0	0	0	0	0	0	0	0	0	0	0	0	0	0	WBGene00044646
B0205.2	0	0	0	0	0	0	0	0	0	0	0	0	0	0	0	0	0	0	0	0	WBGene00015018
B0205.3	36	115	147	180	234	139	18	25	50	126	34	54	83	198	183	114	73	48	48	61	WBGene00004466
B0205.4	0	0	0	0	0	0	0	0	0	0	0	0	0	0	0	0	0	0	0	0	WBGene00015019
B0205.5	1	0	0	0	0	0	0	0	0	0	0	0	0	0	0	0	0	0	0	0	WBGene00015020
B0205.6	10	67	50	56	70	41	5	6	13	19	6	17	23	56	57	23	9	6	14	7	WBGene00015021
B0205.7	27	89	92	113	140	71	6	20	26	72	38	33	58	148	129	57	23	20	35	28	WBGene00002191
B0205.8	8	30	44	40	39	21	6	2	6	24	10	14	22	33	39	16	16	9	11	8	WBGene00015022
B0205.9	4	6	18	28	26	27	1	4	10	27	2	7	14	13	23	21	8	2	8	3	WBGene00015023
B0207.1	0	0	0	0	0	0	0	0	0	0	0	0	0	0	0	0	0	0	0	0	WBGene00015026
B0207.10	0	0	0	0	0	0	0	0	0	0	0	0	0	0	0	0	0	0	0	0	WBGene00015033
B0207.11	0	0	0	0	0	0	0	0	0	0	0	0	0	0	0	0	0	0	0	0	WBGene00015034
B0207.12	0	0	0	0	0	0	0	0	0	0	0	0	0	0	0	0	0	0	0	0	WBGene00000232
B0207.2	0	0	0	0	0	0	0	0	0	0	0	0	0	0	0	0	0	0	0	0	WBGene00015027
B0207.3	0	0	0	0	0	0	0	0	0	0	0	0	0	0	0	0	0	0	0	0	WBGene00001676
B0207.4	7	20	50	54	82	56	16	12	18	54	9	16	25	30	56	24	22	13	25	19	WBGene00000099
B0207.5	0	0	0	1	0	0	0	0	0	0	0	0	0	0	0	0	0	0	0	0	WBGene00015028
B0207.6	3	20	19	21	29	27	5	1	12	24	5	13	25	22	17	13	9	2	6	3	WBGene00015029
B0207.7	0	0	0	0	0	0	0	0	0	0	0	0	0	0	0	0	0	0	0	0	WBGene00015030
B0207.8	0	0	0	0	0	0	0	0	0	0	0	0	0	0	0	0	0	0	0	0	WBGene00015031
B0207.9	0	0	0	0	0	0	0	0	0	0	0	0	0	0	0	0	0	0	0	0	WBGene00015032
B0212.1	0	0	0	0	0	0	0	0	0	0	0	0	0	0	0	0	0	0	0	0	WBGene00015035
B0212.2	0	0	0	0	0	0	0	0	0	0	0	0	0	0	0	0	0	0	0	0	WBGene00015036
B0212.3	0	0	1	0	3	5	0	1	0	3	0	0	1	1	3	5	2	0	2	0	WBGene00015037
B0212.4	0	0	0	0	0	0	0	1	0	0	0	2	0	2	0	0	0	0	0	0	WBGene00015038
B0212.5	0	0	0	0	0	0	0	0	0	0	0	0	0	0	0	0	0	0	0	0	WBGene00003889
B0212.6	0	0	0	0	0	0	0	0	0	0	0	0	0	0	0	0	0	0	0	0	WBGene00044111
B0213.10	0	0	0	0	0	0	0	0	0	0	0	0	0	0	0	0	0	0	0	0	WBGene00015040
B0213.11	0	0	0	0	0	0	0	0	0	0	0	0	0	0	0	0	0	0	0	0	WBGene00015041
B0213.12	0	0	0	0	0	0	0	0	0	0	0	0	0	0	0	0	0	0	0	0	WBGene00015042
B0213.14	0	0	0	0	0	0	0	0	0	0	0	0	0	0	0	0	0	0	0	0	WBGene00015043
B0213.15	0	0	0	0	0	0	0	0	0	0	0	0	0	0	0	0	0	0	0	0	WBGene00015044
B0213.16	0	0	0	0	0	0	0	0	0	0	0	0	0	0	0	0	0	0	0	0	WBGene00015045
B0213.17	0	0	0	0	0	0	0	0	0	0	0	0	0	0	0	0	0	0	0	0	WBGene00015046
B0213.2	0	0	0	0	0	0	0	0	1	0	0	1	0	0	0	0	0	0	0	0	WBGene00003765
B0213.3	0	0	0	0	0	0	0	0	0	1	0	0	0	0	0	0	0	0	0	0	WBGene00003766
B0213.4	0	0	0	0	0	0	0	0	0	0	0	0	0	0	0	0	0	0	0	0	WBGene00003767
B0213.5	0	0	0	1	0	1	0	0	0	0	0	0	0	0	0	0	0	0	0	0	WBGene00003768
B0213.6	0	1	1	0	1	0	0	0	1	0	0	1	1	0	0	1	0	1	0	0	WBGene00003769
B0213.7	0	0	0	0	0	0	0	0	0	0	0	0	0	0	0	0	0	0	0	0	WBGene00006142
B0213.8	0	0	0	0	0	0	0	0	0	0	0	0	0	0	0	0	0	0	0	0	WBGene00006141
B0213.9	0	0	0	0	0	0	0	0	0	0	0	0	0	0	0	0	0	0	0	0	WBGene00006274
B0218.1	0	0	2	0	0	2	2	2	2	1	0	0	0	0	2	7	4	0	0	0	WBGene00015047
B0218.2	0	0	0	0	0	0	0	0	0	0	0	0	0	0	1	1	0	0	0	1	WBGene00015048
B0218.3	0	0	0	0	0	4	2	0	0	2	0	0	0	0	0	2	1	0	2	0	WBGene00004055
B0218.5	0	0	0	0	0	0	0	0	0	0	0	0	0	0	0	0	0	0	0	0	WBGene00015049
B0218.6	0	0	0	0	0	0	0	0	0	0	0	0	0	0	0	0	0	0	0	0	WBGene00015050
B0218.7	0	0	0	0	0	0	0	0	0	0	0	0	0	0	0	0	0	0	0	0	WBGene00015051
B0218.8	0	0	0	0	0	0	0	0	0	0	0	0	0	0	0	0	0	0	0	0	WBGene00015052
B0222.1	0	0	0	0	0	0	0	0	0	0	0	0	0	0	0	0	0	0	0	0	WBGene00015053
B0222.10	0	0	0	0	0	0	0	0	0	0	0	0	0	0	0	0	0	0	0	0	WBGene00015058
B0222.11	0	0	0	0	0	0	0	0	0	0	0	0	0	0	0	0	0	0	0	0	WBGene00044582
B0222.2	0	0	0	0	0	0	0	0	0	0	0	0	0	0	0	0	0	0	0	0	WBGene00015054
B0222.3	0	0	0	0	0	0	0	0	0	0	0	0	0	0	0	0	0	0	0	0	WBGene00015055
B0222.4	0	0	0	0	0	0	0	0	0	0	0	0	0	0	0	0	0	0	0	0	WBGene00006418
B0222.5	0	0	0	0	0	0	0	0	0	0	0	0	0	0	0	0	0	0	0	0	WBGene00015056
B0222.6	0	0	0	0	0	0	0	0	0	0	0	0	0	0	0	0	0	0	0	0	WBGene00000717
B0222.7	0	0	0	0	0	0	0	0	0	0	0	0	0	0	0	0	0	0	0	0	WBGene00000718
B0222.8	0	0	0	0	0	0	0	0	0	0	0	0	0	0	0	0	0	0	0	0	WBGene00000599
B0222.9	0	0	0	0	0	0	0	0	0	0	0	0	0	0	0	0	0	0	0	0	WBGene00015057
B0228.1	0	0	0	0	0	0	0	0	0	0	0	0	0	0	0	0	0	0	0	0	WBGene00015059
B0228.4	0	0	0	0	1	0	0	0	0	2	0	0	0	1	0	2	0	0	1	1	WBGene00015061
B0228.5	0	0	0	0	0	0	0	0	0	0	0	0	0	0	0	0	0	0	0	0	WBGene00015062
B0228.6	0	0	0	0	0	0	0	0	0	0	0	0	0	0	0	0	0	0	0	0	WBGene00015063
B0228.7	7	35	28	33	41	19	1	1	2	4	4	16	28	26	37	7	1	0	3	2	WBGene00015064
B0228.8	0	0	0	0	0	0	0	0	0	0	0	0	0	0	0	0	0	0	0	0	WBGene00015065
B0228.9	0	0	0	0	0	0	0	0	0	0	0	0	0	0	0	0	0	0	0	0	WBGene00015066
B0238.1	0	0	0	0	0	1	1	0	0	0	0	0	0	0	0	1	0	0	0	0	WBGene00015067
B0238.10	4	13	18	24	23	23	2	5	7	26	3	10	17	14	22	12	7	3	8	9	WBGene00015074
B0238.11	41	95	121	186	196	163	22	14	39	116	30	46	96	96	96	69	31	26	15	18	WBGene00015075
B0238.12	0	0	0	0	0	0	0	0	0	0	0	0	0	0	0	0	0	0	0	0	WBGene00015076
B0238.13	0	0	0	0	0	1	2	0	0	0	0	0	0	0	0	1	0	0	0	0	WBGene00015077
B0238.15	0	0	0	0	0	1	0	0	0	1	0	0	0	0	0	1	0	0	0	0	WBGene00044537
B0238.3	0	0	0	0	0	0	0	0	0	0	0	0	0	0	0	0	0	0	0	0	WBGene00015068
B0238.5	0	0	0	0	0	0	0	0	0	0	0	0	0	0	0	0	0	0	0	0	WBGene00015069
B0238.6	0	0	0	0	0	0	0	0	0	0	0	0	0	0	0	0	0	0	0	0	WBGene00015070
B0238.7	0	0	0	0	0	0	0	0	0	0	0	0	0	0	0	0	0	0	0	0	WBGene00015071
B0238.8	0	0	0	0	0	0	0	0	0	0	0	0	0	0	0	0	0	0	0	0	WBGene00015072
B0238.9	6	22	60	87	120	59	6	9	20	58	9	19	49	71	111	41	17	9	18	11	WBGene00015073
B0240.1	0	0	0	0	0	0	0	0	0	0	0	0	0	0	0	0	0	0	0	0	WBGene00004359
B0240.2	0	0	0	0	0	0	0	0	0	0	0	0	0	0	0	0	0	0	0	0	WBGene00007117
B0240.3	0	0	0	0	0	0	0	0	0	0	0	0	0	0	0	0	0	0	0	0	WBGene00000907
B0240.4	10	50	64	60	122	105	13	16	40	62	11	30	26	54	93	53	27	23	41	25	WBGene00007118
B0244.10	0	0	0	0	0	0	0	0	0	0	0	0	0	0	0	0	0	0	0	0	WBGene00015085
B0244.11	0	0	0	0	0	0	0	0	0	0	0	0	0	0	0	0	0	0	0	0	WBGene00015086
B0244.15	0	0	0	0	0	0	0	0	0	0	0	0	0	0	0	0	0	0	0	0	WBGene00206513
B0244.2	0	0	0	0	0	0	0	0	0	0	0	0	0	0	0	0	0	0	0	0	WBGene00002048
B0244.4	0	0	0	0	0	0	0	0	0	0	0	0	0	0	0	0	0	0	0	0	WBGene00015079
B0244.5	0	0	0	0	0	0	0	0	0	0	0	0	0	0	0	0	0	0	0	0	WBGene00015080
B0244.6	1	0	0	0	0	0	0	0	0	0	0	0	0	0	0	0	0	0	0	0	WBGene00015081
B0244.7	0	0	0	0	0	0	0	0	0	0	0	0	0	0	0	0	0	0	0	0	WBGene00015082
B0244.8	9	18	85	209	491	382	67	55	152	287	6	22	116	196	381	246	193	129	181	81	WBGene00015083
B0244.9	0	0	0	0	0	0	0	0	0	0	0	0	0	0	0	0	0	0	0	0	WBGene00015084
B0250.1	332	747	839	858	874	689	102	56	91	52	549	559	745	883	762	406	148	39	24	7	WBGene00004413
B0250.10	0	0	0	0	0	0	0	0	0	0	0	0	0	0	0	0	0	0	0	0	WBGene00007127
B0250.18	0	0	0	0	0	0	0	0	0	0	0	0	0	0	0	0	0	0	0	0	WBGene00206505
B0250.2	0	0	0	0	0	0	0	0	0	0	0	0	0	0	0	0	0	0	0	0	WBGene00007119
B0250.5	6	25	42	64	83	42	7	7	19	41	7	9	21	57	52	32	16	16	18	13	WBGene00007122
B0250.6	0	0	0	0	0	0	0	0	0	0	0	0	0	0	0	0	0	0	0	0	WBGene00007123
B0250.8	14	39	55	37	54	51	3	0	0	5	20	7	30	28	8	8	1	0	0	2	WBGene00007125
B0250.9	0	0	0	3	2	0	0	0	1	0	0	0	0	0	0	1	0	0	0	0	WBGene00007126
B0252.1	1	0	0	0	0	0	0	0	0	0	0	0	0	0	0	0	0	0	0	0	WBGene00015087
B0252.2	0	0	0	1	0	0	0	0	0	0	0	0	1	0	0	3	0	0	0	1	WBGene00000211
B0252.3	0	0	0	0	0	1	2	0	1	1	0	0	0	0	0	0	1	1	1	2	WBGene00015088
B0252.4	2	22	26	36	57	36	4	5	7	24	2	7	21	29	28	24	16	7	7	4	WBGene00000886
B0252.5	0	0	0	0	0	0	0	0	0	0	0	0	0	0	0	0	0	0	0	0	WBGene00015089
B0252.8	0	0	0	0	0	0	0	0	0	0	0	0	0	0	0	0	0	0	0	0	WBGene00044615
B0261.1	4	20	22	28	42	21	0	2	6	26	5	5	18	27	29	26	6	3	13	6	WBGene00015091
B0261.2	6	10	29	24	34	27	7	10	6	25	8	9	14	25	35	12	10	5	21	7	WBGene00002583
B0261.4	5	25	28	22	29	20	0	4	1	4	4	7	16	32	24	12	7	1	8	0	WBGene00015092
B0261.5	0	0	0	0	0	0	0	0	0	0	0	0	0	0	0	0	0	0	0	0	WBGene00015093
B0261.6	0	0	0	0	0	0	0	0	0	0	0	0	0	0	0	0	0	0	0	0	WBGene00015094
B0261.7	48	159	243	312	359	240	26	47	96	166	66	96	186	142	190	86	52	50	46	20	WBGene00015095
B0261.8	0	1	1	0	5	8	4	0	2	3	0	0	1	3	3	12	0	0	1	4	WBGene00015096
B0261.9	0	0	0	0	0	0	0	0	0	0	0	0	0	0	0	0	0	0	0	0	WBGene00195057
B0272.1	0	0	1	0	0	0	0	0	0	0	0	0	0	0	0	0	0	0	0	0	WBGene00006538
B0272.2	0	0	0	0	0	2	2	0	0	4	0	0	0	0	1	1	0	0	0	0	WBGene00007128
B0272.3	2	0	1	1	1	33	7	6	7	30	0	0	0	0	11	26	14	10	17	17	WBGene00007129
B0272.4	0	0	0	0	0	0	0	0	0	0	0	0	0	0	0	0	0	0	0	0	WBGene00007130
B0273.1	0	0	0	0	0	0	0	1	0	0	0	0	0	0	0	0	0	0	0	0	WBGene00015097
B0273.115	0	1	0	0	1	0	0	0	0	0	0	1	0	0	0	0	0	0	0	0	WBGene00206473
B0273.2	7	18	46	95	171	101	13	17	28	72	2	25	41	74	108	59	37	26	27	19	WBGene00004243
B0273.3	9	31	21	18	19	9	0	0	3	7	12	11	12	20	16	7	1	1	2	0	WBGene00015098
B0273.4	0	0	4	2	0	1	1	0	0	6	1	0	2	1	3	2	1	0	4	7	WBGene00006745
B0280.1	7	22	31	62	72	52	3	5	20	34	12	14	19	34	37	22	10	12	8	3	WBGene00015099
B0280.10	3	3	23	33	23	17	2	4	3	5	3	8	13	10	17	5	5	0	5	3	WBGene00015105
B0280.11	0	0	0	0	0	0	0	0	0	0	0	0	0	0	0	0	0	0	0	0	WBGene00015106
B0280.12	0	0	0	0	0	1	1	0	0	0	0	0	0	0	0	0	0	0	0	0	WBGene00001613
B0280.13	0	0	0	0	0	0	0	0	0	0	0	0	0	0	0	0	0	0	0	0	WBGene00015107
B0280.17	0	0	0	0	0	0	0	0	0	0	0	0	0	0	0	0	0	0	0	0	WBGene00044674
B0280.2	0	0	0	0	0	0	0	0	0	0	0	0	0	0	0	0	0	0	0	0	WBGene00015100
B0280.3	30	85	143	204	262	153	17	23	50	61	26	60	111	183	180	78	46	37	24	16	WBGene00015101
B0280.4	0	0	0	0	0	0	0	0	0	0	0	0	0	0	0	0	0	0	0	0	WBGene00003845
B0280.5	27	48	219	596	815	722	215	216	392	661	20	63	283	494	697	531	449	335	470	253	WBGene00015102
B0280.7	0	0	0	0	0	0	0	0	0	0	0	0	0	0	0	0	0	0	0	0	WBGene00015103
B0280.8	0	0	1	0	0	27	5	2	10	15	0	0	1	2	2	15	4	5	6	5	WBGene00003609
B0280.9	5	18	22	22	35	27	5	5	5	25	2	3	12	23	30	21	7	2	6	2	WBGene00015104
B0281.1	0	0	0	0	0	0	0	0	0	0	0	0	0	0	0	0	0	0	0	0	WBGene00015108
B0281.3	0	0	0	0	0	0	0	0	0	0	0	0	0	0	0	0	0	0	0	0	WBGene00015110
B0281.4	0	0	0	0	10	21	3	0	0	0	0	0	0	0	9	2	0	0	0	0	WBGene00015111
B0281.5	0	0	2	1	0	0	0	0	1	5	0	0	0	0	0	1	1	0	0	1	WBGene00015112
B0281.6	0	0	0	0	0	0	0	0	0	0	0	0	0	0	0	0	0	0	0	0	WBGene00015113
B0281.8	0	0	0	0	0	0	0	0	0	0	0	0	0	0	0	0	0	0	0	0	WBGene00015114
B0284.1	0	0	0	0	0	0	0	0	0	0	0	0	0	0	0	0	0	0	0	0	WBGene00007131
B0284.2	0	0	0	0	0	0	0	0	0	0	0	0	0	0	0	0	0	0	0	0	WBGene00007132
B0284.3	0	0	0	0	0	3	0	0	0	0	0	0	0	0	1	4	0	0	0	0	WBGene00007133
B0284.4	0	0	0	0	0	0	0	0	0	0	0	0	0	0	0	0	0	0	0	0	WBGene00007134
B0285.1	3	12	23	26	19	11	1	2	9	10	1	4	9	16	13	15	3	4	1	7	WBGene00007135
B0285.10	0	0	0	0	0	0	0	0	0	0	0	0	0	0	0	0	0	0	0	0	WBGene00000513
B0285.3	0	20	22	16	24	17	3	5	13	21	8	7	13	16	26	17	9	3	6	5	WBGene00007136
B0285.4	4	15	25	27	32	34	4	1	7	11	7	6	9	19	21	9	4	3	8	3	WBGene00007137
B0285.5	7	15	49	64	84	70	12	12	29	50	6	15	24	40	59	45	11	29	30	22	WBGene00002003
B0285.6	0	0	0	0	0	0	0	0	0	0	0	0	0	0	0	0	0	0	0	0	WBGene00007138
B0285.7	0	0	0	0	0	1	0	0	1	2	0	0	0	0	0	1	0	0	1	0	WBGene00007139
B0285.8	0	0	0	0	0	1	0	0	1	0	0	0	0	0	0	2	2	4	0	0	WBGene00000511
B0285.9	0	0	0	0	0	4	0	1	4	8	0	0	0	0	2	13	6	1	1	3	WBGene00000512
B0286.1	0	0	2	0	1	1	0	0	0	0	0	0	0	1	0	1	0	1	0	1	WBGene00015115
B0286.2	0	0	0	0	0	0	0	0	0	0	0	0	0	0	0	0	0	0	0	0	WBGene00002252
B0286.3	0	0	0	1	1	0	1	0	0	2	0	0	0	0	1	0	1	0	2	1	WBGene00015116
B0286.4	28	56	126	146	311	149	15	28	57	93	20	31	60	127	199	91	42	31	53	34	WBGene00003825
B0286.5	0	0	0	0	0	0	0	0	0	0	0	0	0	0	0	0	0	0	1	0	WBGene00001438
B0286.6	0	0	0	0	0	0	0	0	0	0	0	0	0	0	0	0	0	0	0	0	WBGene00023425
B0294.1	0	0	0	0	0	0	0	0	0	0	0	0	0	0	0	0	0	0	0	0	WBGene00015117
B0294.3	0	0	0	0	0	0	0	0	0	0	0	0	0	0	0	0	0	0	0	0	WBGene00015118
B0302.1	0	0	1	0	0	8	3	2	1	8	2	0	0	0	4	12	4	1	5	1	WBGene00002207
B0302.2	0	0	0	0	0	0	0	0	0	0	0	0	0	0	0	0	0	0	0	0	WBGene00015119
B0302.4	0	0	0	0	0	0	0	0	0	0	0	0	0	0	0	0	0	0	0	0	WBGene00015121
B0302.5	0	0	0	0	0	0	0	0	0	0	0	0	0	0	0	0	1	1	0	1	WBGene00015122
B0303.11	0	0	0	0	0	0	0	0	0	0	0	0	0	0	0	0	0	0	0	0	WBGene00015131
B0303.14	0	0	0	0	0	0	1	1	3	11	0	0	0	0	0	0	5	2	3	1	WBGene00015132
B0303.15	6	35	22	36	48	31	4	2	10	27	14	12	23	36	27	15	12	3	4	7	WBGene00015133
B0303.16	0	0	0	0	0	0	0	0	0	0	0	0	0	0	0	0	0	0	0	0	WBGene00044678
B0303.2	0	1	0	0	3	1	0	0	1	0	0	0	1	1	1	1	0	0	0	0	WBGene00015124
B0303.3	9	26	38	60	140	98	12	13	26	59	7	18	36	34	71	41	30	11	35	20	WBGene00015125
B0303.4	3	10	26	18	24	17	5	5	4	21	4	11	14	11	22	12	6	5	1	3	WBGene00015126
B0303.7	0	1	4	0	0	7	2	4	3	14	0	0	0	0	1	12	1	8	3	1	WBGene00015128
B0303.8	0	0	0	0	0	0	0	0	0	0	0	0	0	0	0	0	0	0	0	0	WBGene00015129
B0303.9	6	14	21	61	98	54	13	11	22	31	3	10	28	49	95	36	21	9	19	8	WBGene00015130
B0304.1	0	0	0	0	0	0	0	0	0	0	0	0	0	0	0	0	0	0	0	0	WBGene00001948
B0304.2	7	18	35	44	67	31	2	6	14	24	9	9	15	25	51	10	10	2	5	2	WBGene00015134
B0304.3	0	0	0	0	0	0	0	0	0	0	0	0	0	1	0	0	0	0	0	0	WBGene00015135
B0304.4	1	12	7	12	14	14	0	1	6	10	1	1	4	12	8	5	4	2	5	0	WBGene00015136
B0304.5	0	0	0	0	0	0	0	1	1	2	0	0	0	0	0	0	0	1	0	1	WBGene00005058
B0304.6	0	0	0	0	0	0	0	0	0	0	0	0	0	0	0	0	0	0	0	0	WBGene00005059
B0304.7	0	0	0	0	0	0	0	0	0	0	0	0	0	0	0	0	0	0	0	0	WBGene00005060
B0304.8	0	0	0	0	1	0	0	0	0	0	0	0	0	0	0	0	0	0	0	0	WBGene00005061
B0304.9	0	0	0	0	0	0	0	0	0	0	0	0	0	0	0	0	0	0	0	0	WBGene00005062
B0310.1	0	0	0	0	0	0	0	0	0	0	0	0	0	0	0	0	0	0	0	0	WBGene00015137
B0310.2	0	0	0	0	0	0	1	0	1	4	0	0	0	0	0	0	0	0	0	0	WBGene00015138
B0310.3	0	0	0	0	0	0	0	0	0	0	0	0	0	0	0	0	0	0	0	0	WBGene00015139
B0310.5	0	0	0	0	0	0	0	0	0	0	0	0	0	0	0	0	0	0	0	0	WBGene00015141
B0310.6	0	0	0	0	0	0	0	0	0	0	0	0	0	0	0	0	0	0	0	0	WBGene00015142
B0331.1	0	0	0	0	0	0	0	0	0	0	0	0	0	0	0	0	0	0	0	0	WBGene00007140
B0331.2	0	0	0	0	0	0	0	0	0	0	0	0	0	0	0	0	0	0	0	0	WBGene00007141
B0334.1	0	0	0	0	0	0	0	1	0	0	0	0	0	0	0	0	0	0	0	0	WBGene00007142
B0334.10	0	0	0	0	0	0	0	0	0	0	1	0	0	0	0	0	0	0	0	0	WBGene00007148
B0334.11	8	33	58	98	159	85	11	16	38	84	9	31	40	66	85	62	24	25	28	9	WBGene00003868
B0334.13	0	0	0	0	0	0	0	0	0	0	0	0	0	0	0	0	0	0	0	0	WBGene00007149
B0334.15	0	6	2	5	3	3	0	1	3	3	2	1	8	4	6	5	3	0	0	0	WBGene00195248
B0334.2	0	1	0	0	5	1	0	2	5	3	0	0	0	2	1	1	3	1	3	0	WBGene00006660
B0334.20	0	0	0	0	0	0	0	0	0	0	0	0	0	0	0	0	0	0	0	0	WBGene00219293
B0334.3	2	9	14	18	22	16	4	5	5	21	3	6	11	7	12	7	9	4	6	4	WBGene00007143
B0334.4	10	32	76	100	131	101	18	9	37	70	10	22	31	49	59	33	19	9	21	26	WBGene00007144
B0334.5	23	34	49	57	70	64	9	11	18	41	14	32	53	45	82	34	23	12	17	14	WBGene00007145
B0334.6	0	0	0	0	0	1	2	2	0	0	0	0	0	0	0	0	0	0	0	0	WBGene00007146
B0334.7	0	0	0	0	0	0	0	0	0	0	0	0	0	0	0	0	0	0	0	0	WBGene00005267
B0334.8	3	10	28	29	34	28	5	4	7	17	4	4	7	31	34	9	8	11	11	11	WBGene00000090
B0336.1	7	27	53	81	107	77	6	5	13	17	11	20	51	46	98	49	33	16	24	6	WBGene00006943
B0336.10	337	696	801	765	802	589	100	64	87	53	402	441	654	871	721	387	137	22	33	12	WBGene00004435
B0336.11	0	0	0	0	0	0	0	1	0	0	0	0	0	0	0	0	0	0	0	1	WBGene00015148
B0336.12	0	0	0	0	0	0	0	0	0	0	0	0	0	0	0	0	0	0	0	0	WBGene00015149
B0336.13	7	22	47	36	66	53	6	5	8	44	11	8	23	40	39	22	13	5	13	3	WBGene00015150
B0336.2	35	120	149	148	185	119	21	30	59	105	24	39	92	155	132	75	40	23	57	39	WBGene00000182
B0336.3	3	11	9	23	27	17	1	3	7	10	3	4	6	14	14	11	6	1	5	0	WBGene00015143
B0336.4	1	1	5	7	10	8	2	1	2	10	0	1	4	5	9	6	8	2	3	5	WBGene00004348
B0336.5	1	13	31	73	87	75	19	9	28	59	1	11	34	36	67	49	31	15	20	12	WBGene00015145
B0336.6	9	25	40	76	112	107	5	18	16	75	8	23	38	57	87	48	28	10	20	11	WBGene00015146
B0336.7	9	14	19	41	43	41	7	2	14	20	8	20	13	23	23	17	10	5	5	5	WBGene00015147
B0336.8	0	4	17	29	31	26	0	5	3	20	5	8	12	15	19	13	15	3	2	2	WBGene00002982
B0336.9	1	16	32	41	31	21	3	1	5	3	6	12	16	16	23	17	8	3	6	1	WBGene00006359
B0344.2	0	0	0	0	0	0	0	0	0	0	0	0	0	0	0	0	0	0	0	0	WBGene00006955
B0348.1	0	0	0	0	0	0	0	0	0	0	0	0	0	0	0	0	0	0	0	0	WBGene00015151
B0348.2	0	0	0	0	0	0	0	0	0	0	0	0	0	0	0	0	0	0	0	0	WBGene00015152
B0348.4	0	0	2	0	0	9	4	0	5	8	0	0	0	1	1	4	2	5	4	1	WBGene00001177
B0348.5	0	0	0	0	0	0	1	0	0	0	0	0	0	0	1	0	0	0	0	0	WBGene00015153
B0348.6	21	90	149	155	223	118	13	22	23	49	34	39	86	202	155	70	36	13	23	14	WBGene00002061
B0350.2	0	0	4	0	0	2	3	0	5	16	0	0	0	1	0	5	1	2	5	3	WBGene00006780
B0350.3	0	0	0	0	0	0	0	0	0	0	0	0	0	0	0	0	0	0	0	0	WBGene00015154
B0353.1	0	0	0	0	0	0	0	0	0	0	0	0	0	0	0	0	0	0	0	0	WBGene00015155
B0361.10	4	26	38	44	55	32	3	9	9	32	3	6	18	31	34	16	15	8	9	14	WBGene00015164
B0361.11	0	0	0	0	0	0	0	0	0	0	0	0	0	0	0	0	0	0	0	0	WBGene00015165
B0361.2	8	26	53	78	113	63	14	20	12	62	10	30	32	48	73	39	20	13	14	12	WBGene00015156
B0361.3	9	12	15	32	50	45	4	17	9	19	3	14	15	25	46	13	15	8	28	6	WBGene00015157
B0361.4	0	0	0	0	0	0	0	0	1	0	0	0	0	0	0	0	0	0	0	0	WBGene00015158
B0361.5	5	15	17	27	36	31	2	5	6	23	7	16	17	23	24	19	2	0	5	5	WBGene00015159
B0361.6	14	79	57	98	91	77	5	12	19	53	14	32	44	51	53	41	22	16	21	12	WBGene00015160
B0361.7	1	5	48	57	64	40	9	8	21	22	1	14	21	19	40	22	10	16	22	10	WBGene00015161
B0361.8	7	13	29	33	38	28	2	0	4	8	3	5	9	6	19	11	2	4	3	0	WBGene00015162
B0361.9	0	0	0	0	0	21	0	1	1	8	0	0	0	0	10	7	1	1	0	2	WBGene00015163
B0365.1	10	39	64	81	139	177	14	32	40	110	9	30	65	87	158	79	56	20	58	48	WBGene00007150
B0365.3	9	48	72	76	104	64	16	16	17	55	13	25	44	76	88	42	25	26	25	11	WBGene00001137
B0365.5	0	0	0	0	0	0	0	0	0	0	0	0	0	0	0	0	0	0	0	0	WBGene00007152
B0365.6	0	0	0	0	0	0	0	0	0	0	0	0	0	0	0	0	0	0	0	0	WBGene00007153
B0365.7	0	0	0	0	0	0	0	0	0	0	0	0	0	0	0	0	0	0	0	0	WBGene00007154
B0365.9	0	0	0	0	0	0	0	0	0	0	0	0	0	0	0	0	0	0	0	0	WBGene00219208
B0379.1	0	0	0	0	1	0	0	0	0	0	0	0	0	0	0	0	0	0	0	0	WBGene00007155
B0379.2	0	0	0	0	0	0	0	0	0	0	0	0	0	0	0	0	0	0	0	0	WBGene00007156
B0379.3	9	36	61	76	88	53	6	14	20	46	5	10	25	48	69	40	22	10	25	18	WBGene00003508
B0379.4	1	2	5	3	8	0	0	0	1	2	1	1	5	1	11	0	1	3	0	0	WBGene00007054
B0379.6	0	0	0	0	0	0	0	0	0	0	0	0	0	0	0	0	0	0	0	0	WBGene00007158
B0379.7	0	0	0	0	0	0	0	0	0	0	0	0	0	0	0	0	0	0	0	0	WBGene00007159
B0391.11	0	0	0	0	0	0	0	0	0	0	0	0	0	0	0	0	0	0	0	0	WBGene00007166
B0391.12	0	0	0	0	0	0	0	0	0	0	0	0	0	0	0	0	0	0	0	0	WBGene00006289
B0391.14	0	0	0	0	0	0	0	0	0	0	0	0	0	0	0	0	0	0	0	0	WBGene00206462
B0391.3	0	0	0	0	0	0	0	0	0	0	0	0	0	0	0	0	0	0	0	0	WBGene00007161
B0391.4	0	0	0	0	0	0	0	0	0	0	0	0	0	0	0	0	0	0	0	0	WBGene00006080
B0391.5	0	0	0	0	0	5	1	0	2	1	0	0	0	0	0	2	4	2	0	1	WBGene00007162
B0391.6	0	0	0	0	0	0	0	0	0	0	0	0	0	0	0	0	0	0	0	0	WBGene00007163
B0391.9	0	1	0	0	0	0	0	0	0	0	0	1	0	0	0	0	1	0	0	0	WBGene00007164
B0393.1	275	697	772	744	768	546	69	34	64	39	406	400	665	788	686	380	131	24	14	9	WBGene00004469
B0393.2	9	47	77	126	159	122	19	23	47	101	2	18	67	65	103	70	35	15	23	24	WBGene00007167
B0393.3	5	37	45	81	118	94	18	16	26	71	13	14	44	50	90	44	20	17	15	14	WBGene00007168
B0393.4	0	0	0	0	0	0	0	0	0	0	0	0	0	0	0	0	0	0	0	0	WBGene00007169
B0393.5	0	0	0	0	1	1	0	0	0	0	0	0	0	0	0	1	0	0	0	0	WBGene00007170
B0393.6	9	27	37	75	122	74	7	8	19	52	13	17	38	34	68	26	16	10	11	11	WBGene00007171
B0393.7	0	0	0	0	0	0	0	0	0	0	0	0	0	0	0	0	0	0	0	0	WBGene00007172
B0393.8	7	31	42	32	61	35	4	0	4	6	11	6	22	27	12	8	2	0	2	0	WBGene00007173
B0393.9	0	1	0	1	3	1	0	0	0	1	0	1	0	1	2	1	0	2	3	4	WBGene00044636
B0395.1	0	0	0	0	0	0	0	0	0	0	0	0	0	0	0	0	0	0	0	0	WBGene00003729
B0395.2	0	0	0	0	0	0	0	0	0	0	0	0	0	0	0	0	0	0	0	0	WBGene00007174
B0395.3	0	1	0	2	0	0	0	0	3	3	0	0	0	0	0	4	0	1	0	1	WBGene00007175
B0399.1	0	0	0	0	0	0	0	0	0	1	0	0	0	0	0	0	0	0	0	0	WBGene00007176
B0399.2	0	0	0	0	0	0	0	0	0	0	0	0	0	0	0	0	0	0	0	0	WBGene00007177
B0403.2	0	0	0	0	0	0	0	0	0	1	0	0	0	0	0	0	0	0	0	0	WBGene00006712
B0403.3	0	0	0	0	0	0	0	0	0	0	0	0	0	0	0	0	0	0	0	0	WBGene00015167
B0403.4	1	1	11	5	6	75	23	9	24	70	0	0	2	2	4	57	49	24	29	8	WBGene00015168
B0403.5	0	0	0	1	0	0	0	0	0	0	0	0	0	0	0	1	0	0	0	0	WBGene00015169
B0403.6	0	0	0	0	0	0	0	0	0	0	0	0	0	0	0	0	0	0	0	0	WBGene00043982
B0410.1	0	0	0	0	0	0	0	0	0	0	0	0	0	0	0	0	0	0	0	0	WBGene00015170
B0410.2	0	0	1	0	0	8	2	0	3	9	0	0	0	0	2	5	4	3	4	3	WBGene00015171
B0410.3	0	0	0	0	0	0	0	0	0	0	0	0	0	0	0	0	0	0	0	1	WBGene00015172
B0412.1	0	0	0	0	0	0	0	0	0	0	0	0	0	0	0	0	0	0	0	0	WBGene00000895
B0412.2	0	0	0	0	0	0	0	0	0	0	0	0	0	0	0	0	0	0	0	0	WBGene00000903
B0412.3	4	32	32	29	56	20	4	2	10	16	6	4	21	32	35	12	8	4	3	5	WBGene00015173
B0412.4	136	493	516	427	542	414	48	27	36	42	223	226	551	649	300	176	32	6	20	6	WBGene00004498
B0414.1	0	0	0	0	0	0	0	0	0	0	0	0	0	0	0	0	0	0	0	0	WBGene00015175
B0414.2	1	0	0	0	0	1	0	0	0	0	0	0	0	0	0	1	0	0	0	0	WBGene00004393
B0414.3	143	429	428	513	581	441	67	89	151	287	161	255	312	288	353	229	153	86	113	49	WBGene00001856
B0414.5	9	60	64	87	69	54	8	7	21	38	6	27	36	67	65	24	22	10	15	17	WBGene00000772
B0414.6	3	17	26	23	32	18	8	6	2	18	1	7	12	24	19	9	8	2	8	3	WBGene00001600
B0414.7	3	10	30	40	57	52	15	6	25	43	9	19	32	33	51	37	21	13	21	10	WBGene00003472
B0414.8	6	22	39	65	101	80	7	12	12	29	3	9	28	44	65	34	21	11	17	6	WBGene00015176
B0416.1	0	0	0	0	0	0	0	0	0	0	0	0	0	0	0	0	0	0	1	0	WBGene00015177
B0416.10	0	0	0	0	1	7	1	0	0	0	0	0	0	0	6	2	1	0	1	0	WBGene00206482
B0416.11	0	0	0	0	0	0	0	0	0	0	0	0	0	0	0	0	0	0	0	0	WBGene00206483
B0416.2	0	0	0	0	0	0	0	0	0	0	0	0	0	0	0	0	0	0	0	0	WBGene00015178
B0416.3	0	0	0	0	0	0	0	0	0	0	0	0	0	0	0	0	0	0	0	0	WBGene00015179
B0416.4	0	0	1	0	0	16	3	2	4	16	0	0	0	0	8	14	1	3	5	1	WBGene00015180
B0416.5	1	1	2	1	2	53	12	6	7	30	0	0	1	1	12	41	12	9	16	9	WBGene00015181
B0416.6	0	1	0	0	2	12	1	0	0	3	1	1	1	0	7	9	5	1	0	1	WBGene00001638
B0416.7	0	0	0	0	0	0	0	0	0	0	0	0	0	0	0	0	0	0	0	0	WBGene00015182
B0432.1	0	0	0	0	0	1	0	0	0	0	0	0	0	0	1	0	0	0	0	0	WBGene00015183
B0432.10	2	4	7	7	9	10	0	1	5	4	1	7	4	13	10	10	1	0	3	0	WBGene00015191
B0432.11	0	0	0	0	0	0	0	0	0	0	0	0	0	0	0	0	0	0	0	0	WBGene00015192
B0432.12	0	0	0	0	0	0	0	0	0	0	0	0	0	0	0	0	0	0	0	0	WBGene00015193
B0432.13	3	8	15	23	26	16	2	4	6	31	2	12	14	14	27	16	8	3	6	5	WBGene00015194
B0432.14	1	0	0	3	3	5	0	0	1	2	0	0	1	2	1	2	3	0	0	0	WBGene00044640
B0432.2	11	25	54	65	53	41	3	6	10	26	12	12	19	51	46	11	8	5	18	12	WBGene00015184
B0432.3	7	32	41	46	39	25	3	1	7	7	9	15	19	45	33	13	3	2	0	1	WBGene00015185
B0432.4	4	21	22	19	27	22	0	5	7	24	5	6	12	26	19	15	5	2	6	8	WBGene00015186
B0432.5	0	0	0	0	0	0	0	0	0	0	0	0	0	0	0	0	0	0	0	0	WBGene00000296
B0432.6	0	0	1	0	0	1	0	0	0	0	0	0	0	1	0	1	0	0	0	0	WBGene00015187
B0432.7	0	1	0	0	0	0	0	0	1	0	0	0	0	0	0	0	0	0	0	0	WBGene00015188
B0432.8	1	5	22	26	40	31	5	4	8	12	2	6	10	14	18	13	11	2	9	3	WBGene00015189
B0432.9	1	0	1	3	0	5	0	0	0	0	1	2	0	1	3	1	1	0	1	0	WBGene00015190
B0454.1	1	5	6	2	5	21	2	1	2	5	0	1	3	2	4	2	3	5	2	2	WBGene00002997
B0454.10	0	0	0	0	0	0	0	0	0	0	0	0	0	0	0	0	0	0	0	0	WBGene00005542
B0454.2	0	0	0	0	0	0	0	0	0	0	0	0	0	0	0	0	0	0	0	0	WBGene00005543
B0454.26	0	0	0	0	0	0	0	0	0	0	0	0	0	0	0	0	1	0	0	0	WBGene00206372
B0454.3	0	0	0	0	0	0	0	0	0	0	0	0	0	0	0	0	0	0	0	0	WBGene00005540
B0454.4	0	0	0	0	0	0	0	0	0	0	0	0	0	0	0	0	0	0	0	0	WBGene00005541
B0454.5	0	0	0	0	0	0	0	0	0	0	0	0	0	0	0	0	0	0	0	0	WBGene00015196
B0454.6	0	0	0	0	0	0	0	0	0	0	0	0	0	0	0	0	0	0	0	0	WBGene00015197
B0454.7	0	0	0	0	0	0	0	0	0	0	0	0	0	0	0	0	0	0	0	0	WBGene00015198
B0454.8	0	0	0	0	0	0	0	0	0	0	0	0	0	0	0	0	0	0	0	0	WBGene00015199
B0454.9	0	0	1	0	0	22	3	4	6	8	0	1	0	0	1	14	4	5	3	2	WBGene00015200
B0457.1	6	23	51	46	66	48	6	18	33	53	7	6	41	45	75	34	13	6	30	26	WBGene00002251
B0457.2	0	0	0	0	0	0	0	0	0	0	0	0	0	0	0	0	0	0	0	0	WBGene00007178
B0457.4	0	0	0	0	0	0	0	0	0	0	0	0	0	0	0	0	0	0	0	0	WBGene00007179
B0457.6	0	0	0	0	2	0	0	0	0	0	1	0	0	0	0	1	0	1	0	0	WBGene00007180
B0462.1	0	0	0	0	0	0	0	0	0	0	0	0	0	0	0	0	0	0	0	0	WBGene00007181
B0462.3	0	0	0	0	0	0	0	0	0	0	0	0	0	0	0	0	0	0	0	0	WBGene00007182
B0462.4	0	0	0	0	0	0	0	0	0	0	0	0	0	0	0	0	0	0	0	0	WBGene00007183
B0462.5	0	0	0	0	0	0	0	0	0	0	0	0	0	0	0	0	0	0	0	0	WBGene00194695
B0464.1	73	148	185	183	255	137	23	41	74	119	63	71	139	266	201	88	54	23	65	43	WBGene00001094
B0464.2	12	37	57	76	95	84	9	13	32	50	14	37	52	72	70	50	19	24	32	13	WBGene00007184
B0464.3	11	24	45	54	64	55	13	9	28	76	10	14	33	48	55	40	37	17	31	28	WBGene00007185
B0464.4	2	15	46	44	55	48	5	9	15	39	1	14	26	26	58	24	19	15	31	9	WBGene00000268
B0464.5	22	81	156	135	181	98	9	13	22	65	40	55	79	146	150	79	34	25	37	32	WBGene00004980
B0464.6	3	19	31	33	45	29	6	3	15	38	12	17	21	26	35	19	14	7	10	9	WBGene00007186
B0464.7	14	69	79	83	96	86	13	10	37	42	17	30	46	124	73	31	16	5	9	5	WBGene00000235
B0464.8	5	11	15	20	31	23	3	3	8	12	7	11	19	15	21	8	6	2	4	1	WBGene00007187
B0464.9	5	21	32	51	59	46	9	10	7	26	2	11	30	28	34	14	7	9	7	5	WBGene00007188
B0478.1	0	0	0	1	0	1	0	0	1	0	0	0	0	0	0	0	0	0	0	1	WBGene00002178
B0478.3	0	0	0	0	0	0	0	0	0	0	0	0	0	0	0	0	0	0	0	0	WBGene00015202
B0491.1	0	15	19	29	41	35	4	5	10	16	3	12	16	14	28	15	7	7	2	2	WBGene00007189
B0491.2	0	0	0	0	0	0	0	0	0	0	0	0	0	0	0	0	0	0	0	0	WBGene00005016
B0491.3	0	0	0	0	0	0	0	0	0	0	0	0	0	0	0	0	0	0	0	0	WBGene00007190
B0491.4	0	0	0	0	0	0	0	0	0	0	0	0	0	0	0	0	0	0	0	0	WBGene00007191
B0491.5	10	39	52	59	76	51	8	11	22	39	13	22	31	73	45	24	15	8	13	15	WBGene00007192
B0491.6	2	6	16	17	25	24	2	1	2	18	4	10	8	6	15	7	2	4	0	1	WBGene00007193
B0491.7	8	27	30	27	31	17	3	1	2	5	4	10	12	39	15	9	4	3	2	1	WBGene00007194
B0491.8	0	0	0	0	0	0	0	0	0	0	0	0	0	0	0	0	0	0	0	0	WBGene00000529
B0495.1	0	0	0	0	1	0	0	0	0	0	0	0	0	0	0	0	0	0	0	0	WBGene00005149
B0495.10	0	0	0	0	0	0	0	0	0	1	0	0	0	0	0	0	0	0	2	0	WBGene00007044
B0495.2	6	29	31	41	52	35	3	8	8	11	15	20	23	40	49	24	9	5	14	4	WBGene00015203
B0495.4	0	0	0	0	0	0	0	0	0	0	0	0	0	0	0	0	0	0	0	0	WBGene00003730
B0495.5	0	3	10	9	9	15	0	0	0	5	0	5	6	5	10	1	0	0	0	0	WBGene00015204
B0495.6	3	28	51	29	61	40	2	8	14	29	8	7	14	41	28	13	7	5	11	6	WBGene00015205
B0495.7	13	28	40	43	62	44	7	8	19	31	19	21	21	34	59	40	20	10	16	9	WBGene00015206
B0495.8	13	25	43	55	66	63	8	9	11	37	17	10	35	38	49	44	16	7	19	9	WBGene00015207
B0495.9	11	20	37	47	50	32	2	3	6	8	12	14	23	25	24	25	4	6	3	3	WBGene00015208
B0496.1	0	0	0	0	0	0	0	0	0	0	0	0	0	0	0	0	0	0	0	0	WBGene00015210
B0496.11	0	0	0	0	0	0	0	0	0	0	0	0	0	0	0	0	0	0	0	0	WBGene00194883
B0496.2	0	0	0	0	0	0	0	0	0	0	0	0	0	0	0	0	0	0	0	0	WBGene00015211
B0496.3	0	1	2	0	0	0	0	0	0	0	0	0	0	0	0	0	0	0	2	0	WBGene00006814
B0496.5	0	0	0	0	0	0	0	0	0	0	0	0	0	0	0	0	0	0	0	0	WBGene00015214
B0496.6	0	0	0	0	0	0	0	0	0	0	0	0	0	0	0	0	0	0	0	0	WBGene00015215
B0496.7	0	1	0	2	1	3	1	0	0	0	0	0	0	1	1	0	0	0	0	0	WBGene00015216
B0496.8	0	0	2	0	3	2	4	3	2	2	0	0	0	0	0	1	5	1	2	0	WBGene00015217
B0507.1	0	0	0	0	0	1	0	0	0	0	0	0	0	0	0	3	2	0	0	0	WBGene00015218
B0507.10	0	0	0	0	0	0	0	0	0	0	0	0	0	0	0	0	0	0	0	0	WBGene00015227
B0507.11	0	0	0	0	0	0	0	0	0	0	0	0	0	0	0	0	0	0	0	0	WBGene00006006
B0507.15	0	0	0	0	0	0	0	0	0	0	0	0	0	0	0	0	0	0	0	0	WBGene00202499
B0507.2	0	0	0	0	1	2	1	1	1	9	0	0	0	0	1	2	5	2	0	2	WBGene00015219
B0507.3	0	0	0	0	0	0	0	0	0	0	0	0	0	0	0	0	0	0	0	0	WBGene00015220
B0507.4	0	0	0	0	0	0	0	0	0	0	0	0	0	0	0	0	0	0	0	0	WBGene00015221
B0507.5	0	0	0	0	0	0	0	0	0	0	0	0	0	0	0	0	0	0	0	0	WBGene00015222
B0507.6	0	1	0	0	0	0	0	0	0	0	0	0	0	0	0	0	0	0	0	0	WBGene00015223
B0507.7	0	0	0	0	0	0	0	0	0	0	0	0	0	0	0	0	0	0	0	0	WBGene00015224
B0507.8	0	0	0	0	0	0	0	0	0	0	0	0	0	0	0	0	0	0	0	0	WBGene00015225
B0507.9	0	0	0	0	0	0	0	0	0	0	0	0	0	0	0	0	0	0	0	0	WBGene00015226
B0511.1	0	1	1	0	0	1	0	0	0	1	0	0	0	0	0	2	0	0	1	0	WBGene00001432
B0511.10	9	33	42	42	45	21	6	13	7	22	8	17	24	51	47	18	12	7	5	3	WBGene00001228
B0511.11	0	0	0	0	0	3	0	0	0	2	0	7	4	9	3	1	3	0	1	0	WBGene00015236
B0511.12	1	16	32	38	50	50	12	10	15	33	5	20	28	44	64	28	14	22	15	9	WBGene00015237
B0511.13	7	28	44	71	87	52	11	10	20	39	13	17	34	42	44	24	19	4	13	16	WBGene00015238
B0511.17	0	0	0	0	0	0	0	0	0	0	0	0	0	0	0	0	0	0	0	0	WBGene00219234
B0511.2	0	3	3	5	5	2	0	0	0	1	1	1	1	1	5	1	0	0	2	2	WBGene00015228
B0511.3	0	0	0	0	0	0	0	0	0	0	0	0	0	0	1	0	0	0	0	0	WBGene00015229
B0511.4	0	0	0	0	0	0	0	0	0	0	0	0	0	0	0	0	0	0	0	0	WBGene00015230
B0511.5	0	1	0	0	1	1	0	0	0	0	0	0	0	0	0	0	0	0	0	0	WBGene00015231
B0511.6	28	85	96	84	111	70	10	8	16	22	31	27	58	102	78	39	20	5	12	7	WBGene00015232
B0511.7	2	11	20	43	38	29	4	2	8	22	4	9	14	17	19	16	7	4	10	5	WBGene00015233
B0511.8	7	25	19	38	36	20	4	5	9	10	6	8	18	41	21	7	3	1	4	2	WBGene00044321
B0511.9	11	48	130	135	139	48	10	13	17	55	15	39	47	66	54	45	28	16	20	12	WBGene00015235
B0513.1	0	0	0	0	0	1	0	2	0	4	0	0	0	0	1	2	1	1	1	0	WBGene00001562
B0513.2	16	59	70	92	86	50	7	8	14	33	18	34	70	84	47	48	18	11	13	5	WBGene00007195
B0513.3	279	697	725	658	771	574	77	41	50	46	297	357	725	763	543	249	70	16	13	6	WBGene00004443
B0513.4	4	10	21	35	39	61	45	61	57	73	0	5	17	66	83	67	72	47	55	104	WBGene00007196
B0513.5	0	0	0	1	2	3	0	0	1	3	0	0	0	2	0	3	1	0	2	3	WBGene00007197
B0513.6	0	0	0	0	0	1	0	0	0	0	0	0	0	0	0	0	0	0	0	0	WBGene00007198
B0513.9	0	0	0	0	0	0	0	0	0	0	0	0	0	0	0	0	0	0	0	0	WBGene00007200
B0523.1	0	0	0	0	0	0	0	0	0	0	0	1	0	0	1	0	0	0	0	0	WBGene00002212
B0523.3	6	34	46	56	47	23	4	6	10	17	14	15	33	37	33	12	7	5	6	2	WBGene00003993
B0523.5	6	22	21	22	39	34	4	10	8	14	10	10	13	19	33	20	4	6	7	3	WBGene00001443
B0524.2	0	0	0	0	0	0	0	0	0	0	0	0	0	0	0	0	0	0	0	0	WBGene00015241
B0524.3	0	0	0	0	0	0	0	0	0	0	0	0	0	0	0	0	0	0	0	0	WBGene00015242
B0524.4	0	0	0	0	0	0	0	0	0	0	0	0	0	0	0	0	0	0	0	0	WBGene00015243
B0524.5	0	0	0	0	0	0	0	0	0	0	0	0	0	0	0	0	0	0	0	0	WBGene00015244
B0524.6	0	0	0	1	0	1	0	0	0	1	0	1	0	2	1	0	0	0	0	0	WBGene00015245
B0545.1	0	0	0	0	0	0	0	0	0	0	0	0	0	0	0	0	0	0	0	0	WBGene00006599
B0545.3	0	0	0	0	0	0	0	0	0	0	0	0	0	0	0	0	0	0	0	0	WBGene00015246
B0545.4	0	1	3	4	4	1	4	3	1	7	0	0	0	0	0	1	4	1	1	0	WBGene00015247
B0546.1	46	189	180	225	235	166	22	47	64	124	49	58	152	327	192	111	58	33	67	48	WBGene00015248
B0546.2	4	17	28	51	57	38	9	6	10	33	6	14	19	29	27	20	10	6	11	6	WBGene00015249
B0546.3	0	0	0	0	1	0	0	0	0	0	0	0	0	0	0	0	0	0	0	0	WBGene00015250
B0546.4	6	13	21	31	33	28	7	6	9	18	4	10	12	20	33	22	12	4	7	13	WBGene00015251
B0546.5	0	0	0	0	0	0	0	0	0	0	0	0	0	0	0	0	0	0	0	0	WBGene00015252
B0547.1	12	66	82	99	162	102	9	18	26	47	11	32	42	80	79	50	33	18	30	20	WBGene00000817
B0547.2	0	0	0	0	0	0	0	0	0	0	0	0	0	0	0	0	0	0	0	0	WBGene00015253
B0547.4	0	0	0	0	0	0	0	0	0	0	0	0	0	0	0	0	0	0	0	0	WBGene00005086
B0554.1	0	0	0	0	0	0	0	0	0	0	0	0	0	0	0	0	0	0	0	0	WBGene00015254
B0554.2	0	0	0	0	0	0	0	0	0	0	0	0	0	0	0	0	0	0	0	0	WBGene00015255
B0554.3	0	0	0	0	0	0	0	0	0	0	0	0	0	0	0	0	0	0	0	0	WBGene00015256
B0554.4	0	0	0	0	0	0	0	0	0	0	0	0	0	0	0	0	0	0	0	0	WBGene00015257
B0554.5	0	0	0	0	0	0	0	0	0	0	0	0	0	0	0	0	0	0	0	0	WBGene00015258
B0554.6	0	0	0	0	0	0	0	0	0	0	0	0	0	0	0	0	0	0	0	0	WBGene00015259
B0554.7	0	0	0	0	0	0	0	0	0	0	0	0	0	0	0	0	0	0	0	0	WBGene00015260
B0563.1	0	0	0	0	0	0	0	0	0	0	0	0	0	0	0	0	0	0	0	0	WBGene00015261
B0563.10	0	0	0	0	0	0	0	0	0	0	0	0	0	0	0	0	0	0	0	0	WBGene00077673
B0563.18	0	0	0	0	0	0	0	0	0	0	0	0	0	0	0	0	0	0	0	0	WBGene00206365
B0563.2	0	0	0	0	0	0	0	0	0	0	0	0	0	0	0	0	0	0	0	0	WBGene00006637
B0563.4	1	2	0	1	1	9	2	2	5	11	0	0	1	2	0	11	3	3	3	2	WBGene00006479
B0563.5	0	0	0	0	0	0	0	1	0	0	0	0	0	0	0	0	0	0	0	0	WBGene00015262
B0563.6	0	0	0	1	0	0	0	0	0	1	0	0	0	0	0	0	0	0	0	0	WBGene00015263
B0563.7	0	0	0	0	0	0	0	0	0	0	0	0	0	0	0	0	0	0	0	0	WBGene00015264
B0563.8	0	0	0	0	0	0	0	0	0	0	0	0	0	0	0	0	1	0	1	0	WBGene00015265
B0563.9	0	0	0	0	0	0	0	0	0	0	0	0	0	0	0	0	0	0	0	0	WBGene00044687
B0564.1	16	56	63	62	77	57	7	6	11	39	13	19	33	59	38	23	9	3	3	3	WBGene00007201
B0564.10	0	0	0	0	0	0	0	0	0	0	0	0	0	0	0	0	0	0	0	0	WBGene00006766
B0564.11	4	17	16	33	51	27	4	0	2	9	1	14	14	12	34	18	7	1	2	5	WBGene00023421
B0564.2	1	6	18	22	19	10	1	1	3	2	2	5	5	6	8	6	6	0	1	0	WBGene00007202
B0564.3	0	0	0	0	0	0	0	0	0	0	0	0	0	0	0	0	0	0	0	0	WBGene00007203
B0564.4	0	0	0	0	0	0	0	0	0	0	0	0	0	0	0	0	0	0	0	0	WBGene00007204
B0564.6	0	0	0	2	0	2	0	0	0	0	0	0	0	0	0	0	0	0	0	0	WBGene00007206
B0564.7	7	22	14	19	34	20	2	2	3	13	4	8	15	24	13	11	5	1	2	1	WBGene00007207
B0564.9	0	0	0	2	0	2	0	0	0	0	0	0	0	0	0	0	0	0	0	0	WBGene00007208
BE0003N10.1	2	13	19	18	11	8	1	4	6	15	4	5	10	21	25	10	4	2	9	4	WBGene00015266
BE0003N10.2	1	12	23	22	26	23	7	2	6	13	4	15	17	24	19	14	6	4	8	9	WBGene00015267
BE0003N10.3	1	6	5	3	3	8	1	0	1	6	0	1	2	8	2	4	2	2	1	1	WBGene00015268
BE10.1	0	0	0	0	0	0	0	0	0	0	0	0	0	0	0	0	0	0	0	0	WBGene00007209
BE10.2	0	0	0	0	1	0	0	0	0	0	0	0	0	0	0	0	0	0	0	0	WBGene00007210
BE10.3	0	0	0	0	0	0	0	0	0	0	0	0	0	0	0	0	0	0	0	0	WBGene00007211
BE10.4	1	0	0	0	0	0	0	0	0	1	0	1	0	0	0	0	0	0	0	0	WBGene00007212
BE10.5	0	0	0	0	0	0	0	0	0	0	0	0	0	0	0	0	0	0	0	0	WBGene00044127
C01A2.1	0	0	0	0	0	1	0	0	0	0	0	0	0	0	0	0	0	0	0	0	WBGene00007213
C01A2.2	0	1	0	0	0	0	0	0	0	0	0	0	0	0	0	0	0	0	0	0	WBGene00007214
C01A2.3	3	15	12	13	15	13	0	1	2	6	5	10	10	10	13	3	2	0	0	1	WBGene00007215
C01A2.4	5	18	42	47	55	51	9	5	7	31	3	16	28	32	51	23	12	7	12	7	WBGene00007216
C01A2.5	10	32	34	60	80	41	6	6	10	24	9	21	41	31	49	24	5	5	6	7	WBGene00007217
C01A2.6	0	0	0	1	0	0	0	0	0	0	0	0	0	0	0	0	0	0	0	0	WBGene00007218
C01A2.7	0	0	0	0	0	0	0	0	0	0	0	0	0	0	0	0	0	0	0	0	WBGene00007219
C01A2.9	0	0	0	0	0	0	0	0	0	0	0	0	0	0	0	0	0	0	0	0	WBGene00077546
C01B10.10	0	0	0	0	0	0	0	0	0	0	0	0	0	0	0	0	0	0	0	0	WBGene00015284
C01B10.11	0	0	1	0	0	0	0	0	0	0	0	0	0	0	0	0	0	0	0	0	WBGene00044294
C01B10.3	0	0	0	0	0	1	0	0	0	0	0	0	0	0	0	2	0	0	0	0	WBGene00015278
C01B10.4	0	0	0	0	0	0	0	0	0	0	0	0	0	0	0	0	0	0	0	0	WBGene00015279
C01B10.44	0	0	0	0	0	0	0	0	0	0	0	0	0	0	0	0	0	0	0	0	WBGene00194839
C01B10.5	0	1	6	1	2	0	0	0	0	0	0	0	0	1	1	1	0	0	0	0	WBGene00001858
C01B10.6	0	0	0	0	0	0	0	0	0	1	0	0	0	0	0	0	0	0	0	0	WBGene00015280
C01B10.7	0	0	0	0	0	0	0	0	0	0	0	0	0	0	0	0	0	0	0	0	WBGene00015281
C01B10.8	16	28	22	33	36	23	5	1	6	18	8	7	17	40	38	10	7	5	10	5	WBGene00015282
C01B10.9	5	8	27	34	49	58	1	8	19	33	5	6	19	15	32	27	7	6	16	7	WBGene00015283
C01B12.1	0	0	0	0	0	0	0	0	0	0	0	0	0	0	0	0	0	0	1	0	WBGene00005017
C01B12.2	0	1	2	1	3	49	4	3	6	18	1	1	1	0	10	18	9	7	4	3	WBGene00015285
C01B12.3	0	0	0	0	0	0	0	0	0	0	0	0	0	0	0	0	0	0	0	0	WBGene00015286
C01B12.4	0	0	0	0	0	0	0	0	0	0	0	0	0	0	0	0	0	0	0	0	WBGene00015287
C01B12.5	0	0	0	0	0	0	0	0	0	0	0	0	0	0	0	0	0	0	0	0	WBGene00015288
C01B12.8	0	13	16	24	33	20	2	5	6	12	3	6	18	17	18	15	7	4	4	3	WBGene00015291
C01B4.1	0	0	0	0	0	0	0	0	0	0	0	0	0	0	0	0	0	0	0	0	WBGene00006283
C01B4.10	0	0	0	0	0	0	0	0	0	0	0	0	0	0	0	0	0	0	0	0	WBGene00006136
C01B4.3	0	0	0	0	0	0	0	0	0	0	0	0	0	0	0	0	0	0	0	0	WBGene00006284
C01B4.5	0	0	0	0	0	0	0	0	0	0	0	0	0	0	0	0	0	0	0	0	WBGene00005138
C01B4.6	0	0	0	0	0	4	5	2	0	8	0	0	0	0	0	6	3	0	1	1	WBGene00015270
C01B4.7	0	0	1	1	0	1	0	0	0	0	1	0	0	0	0	1	0	0	0	0	WBGene00015271
C01B4.8	0	0	0	0	0	0	0	0	0	0	0	0	0	0	0	0	0	0	0	0	WBGene00015272
C01B4.9	0	0	0	0	0	1	0	0	0	0	0	1	0	0	0	0	0	0	0	0	WBGene00015273
C01B7.1	0	0	0	0	1	4	2	1	1	4	0	0	0	0	0	8	5	0	6	3	WBGene00015274
C01B7.3	0	0	0	0	0	0	0	0	0	0	0	0	0	0	0	0	0	0	0	0	WBGene00015275
C01B7.4	0	0	1	0	0	0	0	0	1	0	1	0	0	0	0	0	0	0	0	0	WBGene00006467
C01B7.5	0	0	0	0	0	0	0	0	0	0	0	0	0	0	0	0	0	0	0	0	WBGene00015276
C01B7.6	0	0	0	0	1	7	2	1	1	3	0	0	0	0	2	2	0	1	3	3	WBGene00004457
C01B7.7	0	0	0	0	0	0	0	0	0	0	0	0	0	0	1	0	0	0	0	0	WBGene00015277
C01B9.1	0	0	0	0	0	0	0	0	0	0	0	0	0	0	0	0	0	0	0	0	WBGene00007220
C01B9.4	0	0	0	0	0	0	0	0	0	0	0	0	0	0	0	0	0	0	0	0	WBGene00194890
C01C10.1	0	0	0	0	0	7	0	0	0	1	0	0	0	0	1	2	0	0	0	0	WBGene00000523
C01C10.2	0	0	0	0	0	0	0	0	0	0	0	0	0	0	0	0	0	0	0	0	WBGene00015294
C01C10.3	0	0	0	0	0	0	0	0	2	4	0	0	0	0	0	0	0	0	0	0	WBGene00015295
C01C10.4	0	0	0	1	0	0	0	0	1	0	0	0	0	0	0	0	0	0	0	0	WBGene00000526
C01C4.1	0	0	0	0	0	0	0	0	0	0	0	0	0	0	0	0	0	0	0	0	WBGene00003739
C01C4.2	0	0	0	0	0	0	0	0	0	0	0	0	0	0	0	0	0	0	0	0	WBGene00015292
C01C4.3	0	0	0	0	0	0	0	0	0	1	0	0	0	0	0	0	0	0	0	0	WBGene00015293
C01C7.1	2	4	31	35	42	44	8	9	22	33	2	10	12	28	51	36	32	11	25	5	WBGene00000186
C01F1.1	10	46	52	61	59	48	8	10	14	31	17	34	56	49	86	22	16	4	12	6	WBGene00015296
C01F1.2	2	24	42	47	43	21	5	6	7	20	7	15	24	38	30	14	4	3	3	2	WBGene00015297
C01F1.3	0	0	0	0	0	0	0	0	0	0	0	0	0	0	0	0	0	0	0	0	WBGene00015298
C01F1.4	0	0	0	1	0	2	0	0	1	0	0	0	0	0	0	0	0	0	2	0	WBGene00015299
C01F1.5	0	0	0	0	0	0	0	0	0	0	0	0	0	0	0	0	0	0	0	0	WBGene00015300
C01F1.6	1	1	9	6	14	16	3	4	2	9	0	0	13	17	20	13	8	7	7	3	WBGene00015301
C01F4.2	0	0	0	0	0	0	0	0	0	0	0	0	0	0	0	0	1	0	0	0	WBGene00015303
C01F6.1	2	11	25	43	63	41	3	10	17	33	3	12	15	21	56	29	17	7	17	3	WBGene00007221
C01F6.14	1	2	0	1	1	1	0	0	0	0	2	0	1	1	0	1	0	0	0	0	WBGene00219207
C01F6.2	0	1	1	0	3	1	0	0	0	0	0	0	0	0	0	0	1	0	0	0	WBGene00007222
C01F6.4	2	16	33	44	78	59	7	7	12	42	5	7	22	27	49	30	18	7	8	10	WBGene00001413
C01F6.5	0	1	3	0	0	2	3	2	6	10	0	0	0	0	1	5	2	3	7	3	WBGene00000120
C01F6.6	1	0	0	0	0	2	0	1	0	0	0	0	1	1	3	0	0	1	0	1	WBGene00006438
C01F6.8	23	112	112	174	192	145	19	19	29	73	33	56	92	155	111	59	19	19	29	12	WBGene00002046
C01F6.9	24	90	88	100	108	63	12	15	38	54	38	30	80	138	84	41	21	7	14	2	WBGene00007223
C01G10.1	0	0	0	0	0	0	0	0	0	0	0	0	0	0	0	0	0	0	0	0	WBGene00007230
C01G10.10	4	14	17	31	14	9	2	0	1	7	1	6	8	9	20	5	3	2	0	2	WBGene00007237
C01G10.11	6	29	55	85	103	90	4	19	29	66	4	21	34	52	85	35	21	20	18	16	WBGene00006808
C01G10.12	0	5	6	10	11	7	1	0	3	1	2	0	6	9	2	2	5	0	0	1	WBGene00001021
C01G10.14	0	0	0	0	0	0	0	0	0	0	0	0	0	0	0	0	0	0	0	0	WBGene00007239
C01G10.15	0	0	0	0	0	0	0	0	0	0	0	0	0	0	0	0	0	0	0	0	WBGene00007240
C01G10.16	0	0	0	0	0	0	0	0	0	0	0	0	0	0	0	0	0	0	0	0	WBGene00007241
C01G10.17	0	0	0	0	0	0	0	0	0	0	0	0	0	0	0	0	0	0	0	0	WBGene00044658
C01G10.18	0	0	0	0	0	0	0	0	0	0	0	0	0	0	0	0	0	0	0	0	WBGene00077583
C01G10.2	0	0	0	0	0	0	0	0	0	0	0	0	0	0	0	0	0	0	0	0	WBGene00005970
C01G10.3	0	0	0	0	0	0	0	0	0	0	0	0	0	0	0	0	0	0	0	0	WBGene00005969
C01G10.4	0	0	0	0	0	0	0	0	0	0	0	0	0	0	0	0	0	0	0	0	WBGene00007231
C01G10.5	0	0	0	0	0	0	0	0	0	0	0	0	0	0	0	0	0	0	0	0	WBGene00007232
C01G10.6	0	0	0	0	0	0	0	0	0	0	0	0	0	0	0	0	0	0	0	0	WBGene00007233
C01G10.7	3	5	20	39	46	30	6	4	9	28	1	9	15	20	32	11	6	1	6	2	WBGene00007234
C01G10.8	15	69	88	121	146	82	7	6	22	53	36	61	92	133	112	38	20	15	25	12	WBGene00007235
C01G10.9	0	1	1	0	0	3	0	0	0	0	0	0	0	2	2	0	1	0	0	0	WBGene00007236
C01G12.1	0	0	0	0	0	9	1	0	2	1	0	0	0	0	0	6	2	1	0	1	WBGene00007242
C01G12.10	0	0	0	0	0	0	0	0	0	0	0	0	0	0	0	0	0	0	0	0	WBGene00007250
C01G12.11	0	0	0	0	0	0	0	0	0	0	0	0	0	0	0	0	0	0	0	0	WBGene00007251
C01G12.13	0	0	0	0	0	0	0	0	0	0	0	0	0	0	0	0	0	0	0	0	WBGene00044333
C01G12.16	0	0	0	0	0	0	0	0	0	0	0	0	0	0	0	0	0	0	0	0	WBGene00219299
C01G12.2	0	0	0	0	0	0	0	0	0	0	0	0	0	0	0	0	0	0	0	0	WBGene00007243
C01G12.3	0	0	0	0	0	0	0	3	0	3	0	0	0	0	0	1	0	1	2	0	WBGene00007244
C01G12.5	0	0	0	0	0	0	0	0	0	0	0	0	0	0	0	0	0	0	0	0	WBGene00007245
C01G12.6	0	0	0	0	0	0	0	0	0	0	0	0	0	0	0	0	0	0	0	0	WBGene00007246
C01G12.7	0	0	0	0	0	0	0	0	0	0	0	0	0	0	0	0	0	0	0	0	WBGene00007247
C01G12.8	0	0	0	0	0	0	0	0	0	0	0	0	0	0	0	0	0	0	0	0	WBGene00007248
C01G12.9	0	0	0	0	0	0	0	0	0	0	0	0	0	0	0	0	0	0	0	0	WBGene00007249
C01G5.2	25	66	115	94	72	10	2	1	1	2	35	58	64	55	29	0	0	0	0	0	WBGene00004179
C01G5.3	0	0	0	0	0	0	0	0	0	1	0	0	0	0	0	0	0	0	0	0	WBGene00015305
C01G5.4	0	0	0	0	0	0	0	0	0	0	0	0	0	0	0	0	0	0	0	0	WBGene00015306
C01G5.5	0	13	27	25	41	27	3	2	7	24	0	8	16	10	28	11	4	5	8	4	WBGene00015307
C01G5.6	6	20	33	51	70	55	6	2	10	37	3	9	28	36	46	19	6	5	6	4	WBGene00015308
C01G5.7	0	0	0	0	0	0	0	0	0	0	0	0	0	0	0	0	0	0	0	0	WBGene00015309
C01G5.8	3	3	19	24	23	23	0	6	3	6	3	4	11	14	27	8	10	1	6	4	WBGene00015310
C01G5.9	0	0	1	0	0	1	0	0	0	0	0	0	0	0	0	0	0	0	0	0	WBGene00015311
C01G6.1	1	2	21	2	2	2	0	1	0	3	3	1	1	3	3	3	1	0	0	0	WBGene00000170
C01G6.2	0	0	0	0	0	0	0	0	0	0	0	0	0	0	0	0	0	0	0	0	WBGene00007224
C01G6.3	2	1	4	3	125	177	19	35	50	116	2	2	2	14	85	67	33	27	31	10	WBGene00007225
C01G6.4	2	11	27	44	47	40	10	15	21	33	7	8	28	14	24	23	18	14	16	6	WBGene00007226
C01G6.5	4	28	54	45	75	47	11	10	18	36	4	15	27	30	55	54	19	19	20	20	WBGene00007227
C01G6.6	9	33	55	79	75	64	7	8	22	29	10	22	39	46	87	31	16	17	22	12	WBGene00006510
C01G6.7	0	0	0	0	0	0	0	0	0	0	0	0	0	0	0	0	0	0	0	0	WBGene00007228
C01G6.8	0	0	0	0	9	42	5	4	12	23	0	0	0	3	21	34	19	8	9	11	WBGene00000289
C01G6.9	0	0	1	0	0	0	0	0	0	0	0	0	0	0	0	0	0	0	1	0	WBGene00007229
C01G8.1	4	12	29	145	344	257	40	28	48	97	5	6	45	93	187	134	93	43	44	31	WBGene00015312
C01G8.2	0	3	2	8	11	9	1	1	1	2	0	2	2	4	10	5	1	1	5	2	WBGene00000540
C01G8.3	0	19	20	53	62	52	2	1	5	25	5	9	33	27	30	15	11	11	17	10	WBGene00000965
C01G8.4	2	10	7	18	16	12	5	1	3	10	0	4	13	8	7	3	5	1	2	0	WBGene00001022
C01G8.5	11	74	80	96	103	80	14	9	10	48	14	30	48	95	83	41	15	7	15	5	WBGene00001333
C01G8.6	27	64	46	60	45	24	0	2	5	15	17	27	32	24	30	9	2	1	0	0	WBGene00015313
C01G8.9	0	0	3	1	2	4	0	0	1	1	0	1	0	3	2	1	0	1	0	0	WBGene00002717
C01H6.1	0	0	0	0	0	0	0	0	0	0	0	0	0	0	0	0	0	0	0	0	WBGene00000637
C01H6.2	0	0	0	0	0	1	0	0	0	1	0	0	0	0	0	0	0	0	0	0	WBGene00007252
C01H6.3	0	0	0	0	0	1	0	0	0	0	0	0	0	0	0	0	0	0	0	0	WBGene00007253
C01H6.4	0	0	0	0	0	0	0	0	0	1	0	0	0	0	0	0	0	0	0	0	WBGene00007254
C01H6.5	1	1	1	5	6	2	1	0	1	3	0	2	1	3	2	1	1	0	1	1	WBGene00003622
C01H6.6	0	1	0	0	0	0	0	0	0	0	0	0	1	0	0	0	0	0	0	0	WBGene00007255
C01H6.7	7	21	47	63	95	68	5	9	28	39	5	25	25	31	80	48	28	5	24	13	WBGene00007256
C01H6.8	0	0	1	0	0	0	0	0	0	0	0	0	0	0	0	0	0	0	0	0	WBGene00007257
C01H6.9	5	7	12	17	26	10	2	0	0	5	4	3	7	15	9	12	4	1	6	2	WBGene00007258
C02A12.1	0	0	0	0	0	0	0	0	0	0	0	0	0	0	0	0	0	0	0	0	WBGene00001781
C02A12.10	0	0	0	0	0	0	0	0	0	0	0	0	0	0	0	0	0	0	0	0	WBGene00044090
C02A12.2	0	0	0	0	0	0	0	0	0	0	0	0	0	0	0	0	0	0	0	0	WBGene00015315
C02A12.3	0	0	0	0	0	0	0	0	0	0	0	0	0	0	0	0	0	0	0	0	WBGene00015316
C02A12.4	0	0	0	0	0	0	0	0	0	1	0	0	0	0	0	0	0	0	0	0	WBGene00003096
C02A12.5	0	0	0	0	0	0	0	0	0	0	0	0	0	0	0	1	0	0	0	0	WBGene00015317
C02A12.6	0	0	0	0	0	0	0	0	0	0	0	0	0	0	0	0	0	0	0	0	WBGene00015318
C02A12.8	0	0	0	0	0	0	0	0	0	0	0	0	0	0	0	0	0	0	0	0	WBGene00044088
C02A12.9	0	0	0	0	0	0	0	0	0	0	0	0	0	0	0	0	0	0	0	0	WBGene00044089
C02B10.1	21	61	59	84	90	54	11	11	16	41	23	16	39	70	78	33	19	7	20	8	WBGene00015326
C02B10.2	4	19	50	49	66	38	3	8	23	38	6	13	29	38	31	23	12	9	17	10	WBGene00015327
C02B10.3	0	0	0	5	5	1	1	0	0	0	0	0	1	5	1	2	3	0	0	1	WBGene00015328
C02B10.4	51	140	178	269	349	246	39	41	106	198	38	87	147	180	241	124	74	63	63	40	WBGene00015329
C02B10.5	4	12	54	62	60	47	7	9	7	19	4	20	32	36	56	34	11	6	13	3	WBGene00015330
C02B10.6	0	0	0	0	0	0	0	0	0	0	0	0	0	0	0	0	0	0	0	0	WBGene00015331
C02B4.1	0	0	0	0	0	0	0	0	0	0	0	0	0	0	0	0	0	0	0	0	WBGene00000082
C02B4.2	0	0	0	0	0	6	0	2	2	5	0	0	0	0	0	6	1	0	3	2	WBGene00003616
C02B4.3	0	0	0	0	0	0	0	0	0	0	0	0	0	0	0	0	0	0	0	0	WBGene00007259
C02B4.4	0	0	0	0	0	0	0	0	0	0	0	0	0	0	0	0	0	0	0	0	WBGene00045386
C02B8.1	0	1	0	0	1	0	0	0	0	0	1	0	0	0	4	1	0	0	0	0	WBGene00015320
C02B8.2	0	0	0	0	0	0	0	0	0	0	0	0	0	0	0	0	0	0	0	0	WBGene00015321
C02B8.3	0	0	0	0	0	0	0	0	0	0	0	0	0	0	0	0	0	0	0	0	WBGene00015322
C02B8.4	0	0	0	0	0	0	0	0	0	0	0	0	0	0	0	0	0	0	0	0	WBGene00001953
C02B8.5	0	0	0	0	0	0	0	0	0	0	0	0	0	0	0	0	0	0	0	0	WBGene00015323
C02B8.6	0	0	0	0	0	0	1	0	0	0	0	0	0	0	0	0	0	0	0	0	WBGene00015324
C02B8.7	0	0	0	0	0	0	0	0	0	0	0	0	0	0	0	0	0	0	0	0	WBGene00015325
C02C2.1	0	0	0	0	0	1	0	0	0	0	0	0	0	0	0	0	0	0	0	0	WBGene00015332
C02C2.3	0	0	0	0	0	0	0	0	0	0	0	0	0	0	0	0	0	0	0	0	WBGene00000845
C02C2.4	0	0	0	0	0	0	0	0	0	0	0	0	0	0	0	0	0	0	0	0	WBGene00015333
C02C2.5	0	0	0	0	0	0	0	0	0	0	0	0	0	0	0	0	0	0	0	0	WBGene00015334
C02C6.1	0	0	0	0	1	23	1	3	9	12	0	0	0	0	13	9	2	5	8	7	WBGene00001130
C02C6.2	0	0	0	0	0	0	0	0	0	0	0	0	0	0	0	0	0	0	0	0	WBGene00007260
C02C6.3	0	0	4	1	0	2	0	1	2	5	0	0	0	0	0	4	2	1	4	1	WBGene00007261
C02D4.1	0	0	0	0	0	0	0	0	0	0	0	0	0	0	0	0	0	0	0	0	WBGene00007262
C02D4.2	0	0	0	0	0	0	0	0	0	0	0	0	0	0	0	0	0	0	0	0	WBGene00004777
C02D5.1	0	0	0	0	0	0	0	0	0	0	0	0	0	0	0	0	0	0	0	0	WBGene00015335
C02D5.2	0	0	1	0	0	0	0	0	1	0	0	0	0	0	0	0	0	0	0	0	WBGene00015336
C02D5.3	0	0	0	0	0	0	0	0	0	0	0	0	0	0	0	0	0	0	0	0	WBGene00015337
C02D5.4	1	0	0	1	0	40	3	4	12	26	0	0	0	0	25	27	13	5	14	8	WBGene00043097
C02E11.1	0	0	4	2	6	125	28	16	23	49	2	3	1	2	31	70	26	31	38	12	WBGene00015344
C02E7.1	0	0	0	0	0	0	0	0	0	0	0	0	0	0	0	0	0	0	0	0	WBGene00015338
C02E7.10	0	0	0	0	0	0	0	0	0	0	0	0	0	0	0	0	0	0	0	0	WBGene00015342
C02E7.13	0	0	0	0	0	0	0	0	0	0	0	0	0	0	0	0	0	0	0	0	WBGene00006244
C02E7.2	0	0	0	0	0	0	0	0	0	0	0	0	0	0	0	0	0	0	0	0	WBGene00005246
C02E7.3	0	0	0	0	0	0	0	0	0	0	0	0	0	0	0	0	0	0	0	0	WBGene00005245
C02E7.4	0	0	0	0	0	0	0	0	0	0	0	0	0	0	0	0	0	0	0	0	WBGene00005247
C02E7.5	0	0	0	0	0	0	0	0	0	0	0	0	0	0	0	0	0	0	0	0	WBGene00005248
C02E7.6	0	0	0	0	0	0	0	0	0	0	0	0	0	0	0	0	0	0	0	0	WBGene00015339
C02E7.7	0	0	0	0	0	0	0	0	0	0	0	0	0	0	0	0	0	0	0	0	WBGene00015340
C02E7.8	0	0	0	0	0	0	0	1	0	0	0	0	0	0	0	0	0	0	0	0	WBGene00015341
C02E7.9	0	0	0	0	0	0	0	0	0	0	0	0	0	0	0	0	0	0	0	0	WBGene00006238
C02F12.1	0	0	0	0	0	0	0	0	0	0	0	0	0	0	0	0	0	0	0	0	WBGene00006643
C02F12.10	0	0	0	0	0	0	0	0	0	0	0	0	0	0	0	1	0	0	0	0	WBGene00045215
C02F12.3	0	0	0	0	0	0	0	0	0	0	0	0	0	0	0	0	0	0	0	0	WBGene00015354
C02F12.4	1	0	0	0	1	8	2	3	6	12	0	0	0	0	3	9	9	3	4	2	WBGene00006431
C02F12.5	0	0	0	0	0	0	0	0	0	0	0	0	0	0	0	0	0	0	0	0	WBGene00015355
C02F12.7	0	0	0	0	0	0	0	0	0	1	0	0	0	0	0	0	1	0	0	0	WBGene00015356
C02F12.8	1	0	1	0	5	30	2	0	9	16	0	0	0	0	9	13	8	1	8	3	WBGene00015357
C02F12.9	0	0	0	0	0	0	0	0	0	0	0	0	0	0	0	0	0	0	0	0	WBGene00015358
C02F4.1	3	14	41	52	76	44	7	12	13	34	4	6	34	30	54	31	18	8	11	8	WBGene00000419
C02F4.2	0	0	0	0	0	1	1	1	0	2	0	0	0	0	1	6	0	0	0	0	WBGene00006527
C02F4.4	0	0	0	0	0	0	0	0	0	0	0	0	0	0	0	0	0	0	0	0	WBGene00007264
C02F4.5	0	0	0	0	0	0	0	0	0	0	0	0	0	0	0	0	0	0	0	0	WBGene00007265
C02F5.1	6	7	4	22	34	16	6	3	7	11	0	2	6	14	18	10	1	2	5	4	WBGene00002231
C02F5.10	1	2	0	0	0	2	0	0	0	0	1	1	1	0	0	0	0	0	0	0	WBGene00015351
C02F5.11	0	0	1	0	0	0	0	0	0	0	0	0	0	0	0	0	0	0	0	0	WBGene00006628
C02F5.12	0	1	1	1	1	26	9	3	2	11	1	0	0	3	6	11	5	1	5	5	WBGene00015352
C02F5.13	6	22	20	41	53	41	8	4	14	56	5	11	17	18	33	24	8	8	5	8	WBGene00015353
C02F5.14	0	0	0	0	0	0	0	0	0	0	0	0	0	0	0	0	0	0	0	0	WBGene00044445
C02F5.2	0	0	0	0	0	0	0	0	0	0	0	0	0	0	0	0	0	0	0	0	WBGene00015345
C02F5.3	7	29	29	37	65	28	8	6	6	26	12	7	25	67	53	24	10	1	10	2	WBGene00015346
C02F5.4	2	28	39	40	57	41	6	5	6	21	7	6	10	25	31	12	5	4	4	1	WBGene00015347
C02F5.5	0	0	0	0	0	0	0	0	0	0	0	0	0	0	0	0	0	0	0	0	WBGene00015348
C02F5.6	0	7	6	7	15	9	0	0	3	7	2	4	5	8	8	7	1	1	3	1	WBGene00015349
C02F5.7	0	9	12	9	10	6	2	0	4	1	1	0	8	6	6	1	1	0	2	0	WBGene00015350
C02F5.8	0	0	0	0	0	0	0	0	0	0	0	0	0	0	0	0	0	0	0	0	WBGene00006627
C02F5.9	27	108	177	232	268	168	20	52	89	140	41	68	99	197	175	109	77	28	86	47	WBGene00003952
C02G6.1	0	0	0	0	0	0	0	0	0	0	0	0	0	0	0	0	0	0	0	0	WBGene00015359
C02G6.2	0	0	0	0	0	0	0	0	0	0	0	0	0	0	0	0	0	0	0	0	WBGene00015360
C02G6.3	0	0	0	0	0	0	0	0	0	0	0	0	0	0	0	0	0	0	0	0	WBGene00044803
C02H6.1	0	0	0	0	0	0	0	0	0	0	0	0	0	0	0	0	0	0	0	0	WBGene00015361
C02H6.2	0	0	0	0	0	0	0	0	0	0	0	0	0	0	0	0	0	0	0	0	WBGene00015362
C02H7.1	0	0	0	0	0	0	0	1	0	0	0	0	0	0	0	0	0	0	0	0	WBGene00001127
C02H7.2	0	0	0	0	0	0	0	0	0	0	0	0	0	0	0	0	0	0	0	0	WBGene00015364
C02H7.3	0	0	0	0	0	0	0	0	0	0	0	0	0	0	0	0	0	0	0	0	WBGene00000086
C03A3.1	0	0	0	0	0	0	0	0	0	0	0	0	0	0	0	0	0	0	0	0	WBGene00007266
C03A3.2	0	0	0	4	1	28	7	9	13	20	1	0	0	5	5	17	20	8	15	6	WBGene00007267
C03A3.3	0	0	0	0	0	0	0	0	0	0	0	0	0	0	0	0	0	0	0	0	WBGene00007268
C03A7.10	0	0	0	0	0	0	0	0	0	0	0	0	0	0	0	0	0	0	0	0	WBGene00015368
C03A7.11	0	0	0	0	0	0	0	0	0	0	0	0	0	0	0	0	0	0	0	0	WBGene00015369
C03A7.12	0	0	0	0	1	0	0	0	0	0	0	0	0	0	0	0	0	0	0	0	WBGene00015370
C03A7.13	0	0	0	0	0	0	0	0	0	0	0	0	0	0	0	0	0	0	0	0	WBGene00015371
C03A7.14	0	0	0	0	0	0	0	0	0	0	0	0	0	0	0	0	0	0	0	0	WBGene00000031
C03A7.2	0	1	0	0	1	0	0	0	0	0	0	0	0	0	0	0	0	0	0	0	WBGene00015366
C03A7.3	0	0	0	0	0	0	0	0	0	0	0	0	0	0	0	0	0	0	0	0	WBGene00005887
C03A7.4	0	0	0	0	0	0	0	0	0	0	0	0	0	0	0	0	0	0	0	0	WBGene00004099
C03A7.5	0	0	0	0	0	0	0	0	0	0	0	0	0	0	0	0	0	0	0	0	WBGene00005929
C03A7.6	0	0	0	0	0	0	0	0	0	0	0	0	0	0	0	0	0	0	0	0	WBGene00005930
C03A7.7	0	0	0	0	0	0	0	0	0	0	0	0	0	0	0	0	0	0	0	0	WBGene00000029
C03A7.8	0	0	0	0	0	0	0	0	0	0	0	0	0	0	0	0	0	0	0	0	WBGene00000030
C03A7.9	0	0	0	0	0	0	0	0	0	0	0	0	0	0	0	0	0	0	0	0	WBGene00015367
C03B1.1	0	0	0	0	0	0	0	0	0	0	0	0	0	0	0	0	0	0	0	0	WBGene00015372
C03B1.10	0	0	0	0	0	0	0	0	0	0	0	0	0	0	0	0	0	0	0	0	WBGene00015380
C03B1.12	3	3	16	13	13	188	28	37	60	121	0	1	1	4	64	143	62	51	46	31	WBGene00003053
C03B1.13	0	0	0	0	0	0	0	0	0	0	0	0	0	0	0	0	0	0	0	0	WBGene00015381
C03B1.14	0	0	0	0	0	0	0	0	0	0	0	0	0	0	0	0	0	0	0	0	WBGene00015382
C03B1.2	0	0	0	0	0	0	0	0	0	0	0	0	0	0	0	0	0	0	0	0	WBGene00015373
C03B1.3	0	0	0	0	0	0	0	0	0	0	0	0	0	0	0	0	0	0	0	0	WBGene00015374
C03B1.4	0	0	0	0	0	0	0	0	0	0	0	0	0	0	0	0	0	0	0	0	WBGene00015375
C03B1.5	0	0	0	0	0	0	0	0	0	0	0	0	0	0	0	0	0	0	0	0	WBGene00015376
C03B1.6	0	0	0	0	0	0	0	0	0	0	0	0	0	0	0	0	0	0	0	0	WBGene00015377
C03B1.7	0	0	0	0	0	5	0	0	0	0	0	0	0	0	1	3	1	0	0	0	WBGene00015378
C03B1.9	0	0	0	0	0	0	0	0	0	0	0	0	0	0	0	0	0	0	0	0	WBGene00015379
C03B8.2	0	2	5	5	7	3	0	0	0	0	2	3	2	2	2	1	0	0	0	0	WBGene00015385
C03B8.3	0	0	0	0	0	0	0	0	0	0	0	0	0	0	0	0	0	0	0	0	WBGene00015386
C03B8.4	7	15	43	49	59	54	5	8	10	19	12	13	26	42	73	24	7	7	14	5	WBGene00003002
C03C10.1	9	36	48	67	89	54	9	10	20	25	12	31	29	86	75	22	10	9	23	15	WBGene00002202
C03C10.2	0	0	0	0	0	0	0	0	0	0	0	0	0	0	0	0	0	0	0	0	WBGene00007269
C03C10.3	15	59	75	112	408	414	92	81	188	296	21	39	58	119	226	202	119	56	73	48	WBGene00004392
C03C10.4	9	21	38	74	100	67	13	12	16	49	8	15	34	45	47	27	23	7	13	6	WBGene00007270
C03C10.5	0	0	0	0	0	0	0	0	0	0	0	0	0	0	0	0	0	0	0	0	WBGene00007271
C03C10.7	0	1	0	0	0	0	0	0	1	0	0	0	0	0	0	0	0	0	0	0	WBGene00007273
C03C10.9	0	0	0	0	0	0	0	0	0	0	0	0	0	0	0	0	0	0	0	0	WBGene00185075
C03C11.1	0	0	0	0	0	0	0	0	0	0	0	0	0	0	0	0	0	0	0	0	WBGene00007274
C03C11.2	0	0	0	0	0	3	1	1	0	0	0	0	0	1	0	0	1	0	0	0	WBGene00001483
C03D6.1	0	0	1	0	1	1	0	0	0	0	0	0	0	0	0	0	0	0	0	0	WBGene00007275
C03D6.3	3	20	28	27	21	24	2	2	7	13	3	8	7	9	27	12	4	3	7	1	WBGene00000466
C03D6.4	14	62	90	116	155	116	20	25	34	81	21	33	75	108	149	74	38	22	51	27	WBGene00003800
C03D6.5	3	31	29	51	78	28	2	4	14	20	11	25	24	24	51	22	6	5	11	6	WBGene00007277
C03D6.6	0	4	12	30	113	79	4	8	10	21	1	1	5	22	56	27	8	1	15	8	WBGene00007278
C03D6.8	32	72	100	74	65	55	6	5	7	22	28	45	50	85	52	19	4	3	10	2	WBGene00004437
C03E10.1	0	0	0	0	0	0	0	0	0	0	0	0	0	0	0	0	0	0	0	0	WBGene00007279
C03E10.3	0	0	0	0	0	0	0	0	0	0	0	0	0	0	0	0	0	0	0	1	WBGene00007281
C03E10.4	13	24	44	83	117	83	8	17	33	94	6	28	48	53	81	47	36	15	23	19	WBGene00001645
C03E10.5	0	0	0	0	0	0	0	0	0	0	0	0	0	0	0	0	0	0	2	0	WBGene00007282
C03E10.6	0	0	0	0	0	0	0	0	0	0	0	0	0	0	0	1	0	0	0	2	WBGene00007283
C03F11.1	0	0	0	0	0	0	0	0	0	0	0	0	0	0	0	0	0	0	0	0	WBGene00015387
C03F11.2	0	0	0	0	0	0	0	0	0	0	0	0	0	0	0	0	0	0	0	0	WBGene00015388
C03F11.3	0	0	0	0	1	0	0	0	0	0	0	0	0	0	0	0	0	0	0	0	WBGene00015389
C03F11.4	0	0	0	0	1	1	1	0	0	0	1	0	0	0	0	1	0	2	2	0	WBGene00015390
C03G5.1	0	0	1	1	0	14	6	4	4	13	1	0	0	2	7	18	16	8	10	7	WBGene00015391
C03G5.10	0	0	0	0	0	0	0	0	0	0	0	0	0	0	0	0	0	0	0	0	WBGene00044338
C03G5.11	0	0	0	0	0	0	0	0	0	0	0	0	0	0	0	0	0	0	0	0	WBGene00044339
C03G5.12	0	0	0	0	0	0	0	0	0	0	0	0	0	0	0	0	0	0	0	0	WBGene00044340
C03G5.13	0	0	0	0	0	0	0	0	0	0	0	0	0	0	0	0	0	0	0	0	WBGene00044357
C03G5.2	0	0	1	0	0	0	0	0	0	0	0	0	0	0	0	0	0	0	0	0	WBGene00015392
C03G5.7	0	0	0	0	0	0	0	0	0	0	0	0	0	0	0	0	0	0	0	0	WBGene00001448
C03G5.8	0	0	0	0	0	0	0	0	0	0	0	0	0	0	1	0	0	0	0	0	WBGene00023477
C03G5.9	0	0	0	0	0	0	0	0	0	0	0	0	0	0	0	0	0	0	0	0	WBGene00044337
C03G6.10	0	0	0	0	0	0	0	0	0	0	0	0	0	0	0	0	0	0	0	0	WBGene00015396
C03G6.11	0	0	0	0	0	0	0	0	0	0	0	0	0	0	0	0	0	0	0	0	WBGene00005439
C03G6.12	0	0	0	0	0	0	0	0	0	0	0	0	0	0	0	0	0	0	0	0	WBGene00015397
C03G6.13	0	0	0	0	0	0	0	0	0	0	0	0	0	0	0	0	0	0	0	0	WBGene00015398
C03G6.14	0	0	0	0	0	0	0	0	0	0	0	0	0	0	0	0	0	0	0	0	WBGene00015399
C03G6.15	0	0	0	0	0	0	0	0	0	0	0	0	0	0	0	0	0	0	0	0	WBGene00015400
C03G6.16	0	0	0	0	0	0	0	0	0	0	0	0	0	0	0	0	0	0	0	0	WBGene00015401
C03G6.17	0	0	0	0	0	0	0	0	0	0	0	0	0	0	0	0	0	0	0	0	WBGene00015402
C03G6.18	0	0	0	0	0	0	0	0	0	0	0	0	0	0	0	0	0	0	0	0	WBGene00005646
C03G6.19	0	0	0	1	0	0	0	0	0	1	0	0	0	1	0	0	0	1	0	0	WBGene00005647
C03G6.2	0	0	0	0	0	0	0	0	0	0	0	0	0	0	0	0	0	0	0	0	WBGene00005947
C03G6.3	0	0	0	0	0	0	0	0	0	0	0	0	0	0	0	0	0	0	0	0	WBGene00005602
C03G6.5	0	0	0	0	0	0	0	0	0	0	0	0	0	0	0	0	0	0	0	0	WBGene00015393
C03G6.6	0	0	0	0	0	0	0	0	0	0	0	0	0	0	0	0	0	0	0	0	WBGene00015394
C03G6.7	0	0	0	0	0	0	0	0	0	0	0	0	0	0	0	0	0	0	0	0	WBGene00005480
C03G6.8	0	0	0	0	0	0	0	0	0	0	0	0	0	0	0	0	0	0	0	0	WBGene00015395
C03G6.9	0	0	0	0	0	0	0	0	0	0	0	0	0	0	0	0	0	0	0	0	WBGene00005450
C03H12.1	0	0	1	0	0	3	0	2	2	10	0	0	0	0	0	10	1	1	1	2	WBGene00007284
C03H5.1	0	0	0	0	0	0	0	0	0	0	0	0	0	0	0	0	0	0	0	0	WBGene00015403
C03H5.2	7	17	17	20	39	24	3	7	8	13	5	17	20	18	28	12	7	4	10	2	WBGene00015404
C03H5.3	11	23	27	20	25	16	1	3	3	12	6	6	11	19	15	8	5	3	5	0	WBGene00015405
C03H5.4	0	0	0	0	0	0	0	0	0	0	0	0	0	0	0	0	0	0	0	0	WBGene00015406
C03H5.5	0	0	0	1	0	1	2	0	2	0	0	0	0	0	3	1	0	3	1	1	WBGene00015407
C03H5.6	0	0	0	0	0	0	0	0	0	0	0	0	0	0	0	0	0	0	0	0	WBGene00015408
C03H5.7	0	0	0	0	0	0	0	0	0	0	0	0	0	0	0	0	0	0	0	0	WBGene00015409
C03H5.9	0	0	0	0	0	0	0	0	0	0	0	0	0	0	0	0	0	0	0	0	WBGene00206366
C04A11.1	0	0	0	0	0	0	0	0	0	0	0	1	0	0	0	0	0	0	0	0	WBGene00007285
C04A11.2	0	0	1	0	0	4	0	0	5	3	0	0	0	0	0	0	3	1	0	0	WBGene00007286
C04A11.3	0	0	0	0	0	0	0	0	0	0	0	0	0	0	1	1	0	0	0	1	WBGene00007287
C04A11.4	1	0	1	1	4	26	2	4	6	15	0	0	0	0	8	24	7	10	13	3	WBGene00000074
C04A11.5	0	0	0	0	0	0	0	0	0	0	0	0	0	0	0	0	0	0	0	0	WBGene00007288
C04A2.1	0	0	3	0	1	2	1	0	1	0	0	0	0	1	0	2	0	0	0	0	WBGene00015410
C04A2.15	0	0	0	0	0	0	0	0	0	0	0	0	0	0	0	0	0	0	0	0	WBGene00206529
C04A2.3	12	49	50	72	143	159	29	29	40	90	17	20	36	72	157	64	39	23	39	36	WBGene00001194
C04A2.7	3	55	93	151	192	157	21	36	49	128	8	31	80	94	161	87	68	45	51	38	WBGene00001023
C04B4.1	0	0	0	0	0	0	0	0	0	0	0	0	0	0	0	0	0	0	0	0	WBGene00007289
C04B4.2	0	0	2	2	11	125	11	23	35	87	1	0	0	2	72	56	19	9	25	26	WBGene00007290
C04B4.3	0	0	0	0	0	0	0	0	0	0	0	0	0	0	0	0	0	0	0	0	WBGene00007291
C04B4.4	0	0	0	0	0	0	0	0	0	0	0	0	0	0	0	0	0	0	0	0	WBGene00007292
C04B4.5	0	0	0	0	0	0	0	0	0	0	0	0	0	0	0	0	0	0	0	0	WBGene00007293
C04B4.6	0	0	0	0	0	0	0	0	0	0	0	0	0	0	0	0	0	0	0	0	WBGene00007294
C04C11.1	0	0	0	0	0	0	0	0	0	0	0	0	0	0	0	0	0	0	0	0	WBGene00007295
C04C11.2	1	0	1	0	0	4	1	5	1	11	0	1	0	0	1	2	1	2	1	4	WBGene00007296
C04C3.1	0	0	0	0	0	0	0	0	0	0	0	0	0	0	0	0	0	0	0	0	WBGene00015411
C04C3.2	0	0	0	0	0	0	0	0	0	0	0	0	0	0	1	1	0	0	0	0	WBGene00015412
C04C3.3	27	63	88	77	110	56	4	9	28	49	19	26	38	96	73	27	27	18	34	15	WBGene00015413
C04C3.4	0	1	4	2	3	1	0	0	0	0	1	2	1	1	0	1	0	0	0	0	WBGene00015414
C04C3.5	0	1	1	0	0	1	0	0	0	0	2	1	1	0	1	0	0	0	0	0	WBGene00001119
C04C3.6	0	0	0	0	0	0	0	0	0	0	0	0	0	0	0	0	0	0	0	0	WBGene00015416
C04C3.7	0	0	0	0	0	0	0	0	0	0	0	0	0	0	0	0	0	0	0	0	WBGene00015417
C04C3.9	0	0	0	0	0	0	0	0	0	0	0	0	0	0	0	0	0	0	0	0	WBGene00195067
C04D8.1	4	14	40	40	72	39	5	10	15	26	3	9	31	45	41	50	13	13	23	8	WBGene00015418
C04E12.10	0	0	0	0	0	0	0	0	0	0	0	0	0	0	0	0	0	0	0	0	WBGene00015439
C04E12.11	0	0	0	0	0	0	0	0	0	0	0	0	0	0	0	0	0	0	0	0	WBGene00015440
C04E12.12	0	0	0	0	0	0	0	0	0	1	0	0	0	0	0	0	0	0	0	0	WBGene00015441
C04E12.2	0	0	0	0	0	0	0	0	0	0	0	0	0	0	0	0	0	0	0	0	WBGene00015433
C04E12.4	0	0	0	0	0	0	0	0	0	0	0	0	0	0	0	0	0	0	0	0	WBGene00015434
C04E12.5	0	0	0	0	0	0	0	0	0	0	0	0	0	0	0	0	0	0	0	0	WBGene00015435
C04E12.6	0	0	0	0	0	0	0	0	0	0	0	0	0	0	0	0	0	0	0	0	WBGene00015436
C04E12.7	0	0	0	0	0	0	0	0	0	0	1	0	0	0	0	0	0	0	1	0	WBGene00015437
C04E12.8	0	0	0	0	0	0	0	0	0	0	0	0	0	0	0	0	0	0	0	0	WBGene00006012
C04E12.9	0	0	0	0	0	0	0	0	0	0	0	0	0	0	0	0	0	0	0	0	WBGene00015438
C04E6.10	0	0	0	0	0	0	0	0	0	0	0	0	0	0	0	0	0	0	0	0	WBGene00005093
C04E6.11	6	34	23	46	52	33	3	7	13	19	11	19	13	28	34	24	11	10	16	6	WBGene00015425
C04E6.13	0	0	0	0	0	0	0	0	0	0	0	0	0	0	0	0	0	0	0	0	WBGene00015427
C04E6.2	0	0	0	0	0	0	0	0	0	0	0	0	0	0	0	0	0	0	0	0	WBGene00015419
C04E6.3	0	0	0	0	0	0	0	0	0	0	0	0	0	0	0	0	0	0	0	0	WBGene00015420
C04E6.4	0	0	0	0	0	0	0	0	0	0	0	0	0	0	0	0	0	0	0	0	WBGene00015421
C04E6.5	0	0	0	0	0	0	0	0	0	0	0	0	0	0	0	0	0	0	0	0	WBGene00015422
C04E6.6	0	0	0	0	0	0	0	0	0	0	0	0	0	0	0	0	0	0	0	0	WBGene00001698
C04E6.7	0	0	0	0	0	0	0	0	0	0	0	0	0	1	0	0	0	2	5	1	WBGene00015423
C04E6.8	0	0	0	0	0	0	0	0	0	0	0	0	0	0	0	0	0	0	0	0	WBGene00015424
C04E6.9	0	0	0	0	0	0	0	0	0	0	0	0	0	0	0	0	0	0	0	0	WBGene00005094
C04E7.1	0	0	0	0	0	0	0	0	0	0	0	0	0	0	0	0	0	0	0	0	WBGene00015428
C04E7.2	0	0	0	0	0	7	1	0	2	12	0	0	0	0	1	6	0	0	1	2	WBGene00015429
C04E7.3	0	0	0	0	0	0	0	0	0	0	0	1	0	0	0	0	0	0	0	0	WBGene00015430
C04E7.4	0	0	0	0	0	1	0	0	1	1	0	0	0	0	0	2	0	1	0	0	WBGene00015431
C04E7.5	0	0	0	0	0	0	0	1	0	0	0	0	0	0	1	0	0	1	0	0	WBGene00045270
C04F1.1	0	0	0	0	0	0	0	0	0	0	0	0	0	0	0	0	0	0	0	0	WBGene00015442
C04F1.3	0	0	2	0	0	0	0	0	0	0	0	0	0	0	0	0	0	0	0	0	WBGene00002989
C04F12.1	0	1	4	0	5	31	7	3	8	24	0	0	1	0	17	10	12	5	10	9	WBGene00007297
C04F12.10	4	13	32	45	63	40	6	12	10	40	8	11	29	24	45	21	11	4	4	6	WBGene00001405
C04F12.12	0	0	0	0	0	0	0	0	0	0	0	0	0	0	0	0	0	0	0	0	WBGene00077685
C04F12.16	0	0	0	0	0	0	0	0	0	0	0	0	0	0	0	0	0	0	0	0	WBGene00219286
C04F12.3	0	0	0	0	0	1	0	0	0	0	0	0	0	0	0	0	0	0	1	0	WBGene00002069
C04F12.4	450	852	917	945	939	797	126	71	84	51	478	586	784	936	733	374	98	25	24	10	WBGene00004426
C04F12.5	5	23	26	27	36	19	3	4	6	12	14	22	18	26	16	12	6	10	2	0	WBGene00007299
C04F12.6	0	0	0	0	0	0	0	0	0	0	0	0	0	0	0	0	0	0	0	0	WBGene00007300
C04F12.7	0	0	0	0	0	0	0	0	0	0	0	0	0	0	0	0	0	0	0	0	WBGene00007301
C04F12.8	0	0	0	0	0	0	0	0	0	0	0	0	0	0	0	0	0	0	0	0	WBGene00007302
C04F12.9	2	0	1	3	7	3	1	1	3	2	0	0	0	2	6	7	3	1	3	5	WBGene00007303
C04F2.1	0	0	0	0	0	0	0	0	0	0	0	0	0	0	0	0	0	0	0	0	WBGene00005300
C04F2.4	0	0	0	0	0	0	0	0	0	0	0	0	0	0	0	0	0	0	0	0	WBGene00005437
C04F5.1	4	23	29	53	60	46	10	11	11	28	8	11	26	22	58	42	11	9	8	14	WBGene00004795
C04F5.2	0	0	0	0	0	0	0	0	0	0	0	0	0	0	0	0	0	0	0	0	WBGene00015444
C04F5.3	0	0	0	0	0	0	0	0	0	0	0	0	0	0	0	0	0	0	0	0	WBGene00006782
C04F5.4	0	0	0	0	0	0	0	0	0	0	0	0	0	0	0	0	0	0	0	0	WBGene00015446
C04F5.5	0	0	0	0	0	0	0	0	0	0	0	0	0	0	0	0	0	0	0	0	WBGene00015447
C04F5.6	0	0	0	0	0	0	0	0	0	0	0	0	0	0	0	0	0	0	0	0	WBGene00015448
C04F5.7	0	0	0	0	0	0	0	0	0	0	0	0	0	0	0	0	0	0	0	0	WBGene00015449
C04F5.8	9	25	33	37	49	27	3	4	9	9	15	14	25	40	25	12	3	2	5	4	WBGene00015450
C04F5.9	2	2	4	17	20	20	1	4	3	5	2	1	6	10	16	7	5	1	2	3	WBGene00015451
C04F6.1	11	2	16	1	0	1	0	0	0	2	0	2	0	0	0	1	0	0	0	0	WBGene00006929
C04F6.3	0	1	10	1	3	2	0	2	2	10	0	0	1	1	3	2	3	3	8	1	WBGene00000503
C04F6.4	0	0	0	1	1	11	3	5	10	13	0	0	1	0	2	13	11	2	6	7	WBGene00006810
C04F6.5	1	0	0	0	0	5	0	0	2	2	0	0	0	0	1	1	2	1	2	0	WBGene00000990
C04F6.7	0	0	0	0	0	0	0	0	0	0	0	0	0	0	0	0	0	0	0	0	WBGene00195081
C04G2.1	0	0	0	0	0	0	0	0	0	1	0	0	0	0	0	0	0	0	0	0	WBGene00007304
C04G2.10	0	3	3	0	2	0	0	1	0	0	0	0	0	0	1	0	0	0	0	0	WBGene00007309
C04G2.11	0	0	0	0	0	0	0	0	0	0	0	0	0	0	0	0	0	0	0	0	WBGene00007310
C04G2.2	0	0	0	0	0	0	0	0	0	0	0	0	0	0	0	0	0	0	0	0	WBGene00007305
C04G2.4	0	0	0	0	0	0	0	0	0	0	0	0	0	0	0	0	0	0	0	0	WBGene00003432
C04G2.5	0	0	0	0	0	0	0	0	0	0	0	0	0	0	0	0	0	0	0	0	WBGene00007306
C04G2.6	14	41	41	53	55	40	5	9	17	34	11	14	27	44	60	32	20	12	27	6	WBGene00001001
C04G2.7	0	0	0	0	0	0	0	0	0	0	0	0	0	0	0	0	0	0	0	0	WBGene00001204
C04G2.8	0	0	0	0	0	0	0	0	0	0	0	0	0	0	0	0	0	0	0	0	WBGene00007307
C04G2.9	0	0	0	0	0	0	0	0	0	0	0	0	0	0	0	0	0	0	0	0	WBGene00007308
C04G6.1	0	0	0	0	0	0	0	0	0	0	0	0	0	0	0	0	0	0	0	0	WBGene00003402
C04G6.10	0	0	0	0	0	0	0	0	0	0	0	0	0	0	0	0	0	0	0	0	WBGene00015458
C04G6.11	0	0	0	0	0	0	0	0	0	0	0	0	0	0	0	0	0	0	0	0	WBGene00015459
C04G6.13	0	0	0	0	0	0	0	0	0	0	0	0	0	0	0	0	0	0	0	0	WBGene00077489
C04G6.2	0	0	0	0	0	1	0	0	0	0	0	0	0	0	0	0	0	0	0	0	WBGene00015453
C04G6.3	6	21	25	40	33	18	3	2	5	12	5	16	28	24	43	13	4	2	7	6	WBGene00004040
C04G6.4	2	5	7	23	13	18	3	1	3	6	2	0	11	6	9	14	10	2	3	2	WBGene00015454
C04G6.5	0	0	0	0	0	0	0	0	0	0	0	0	0	0	0	0	0	0	0	0	WBGene00015455
C04G6.6	0	1	3	1	0	1	0	0	0	0	0	3	1	3	2	0	0	0	0	0	WBGene00015456
C04G6.7	0	0	0	0	0	1	0	0	0	0	0	0	0	0	0	0	0	0	0	0	WBGene00015457
C04H4.1	0	0	0	0	0	0	0	0	0	0	0	0	0	0	0	0	0	0	0	0	WBGene00007311
C04H5.1	1	2	3	0	0	1	0	0	0	0	0	1	0	1	0	0	0	0	0	0	WBGene00007312
C04H5.2	0	0	0	0	0	0	0	0	0	1	0	0	0	0	0	0	0	0	0	0	WBGene00007313
C04H5.3	0	0	0	0	0	0	0	0	0	0	0	0	0	0	0	0	0	0	0	0	WBGene00007314
C04H5.6	4	21	29	28	26	30	3	2	6	23	6	19	17	39	37	24	6	2	13	6	WBGene00003392
C04H5.7	0	0	0	0	0	0	0	0	0	0	0	0	0	0	0	0	0	0	0	0	WBGene00007315
C04H5.8	0	0	0	0	0	0	0	0	0	0	0	0	0	0	0	0	0	0	0	0	WBGene00007316
C05A2.1	0	0	0	0	0	0	0	0	0	1	0	0	0	0	0	0	0	0	0	0	WBGene00004083
C05A9.1	0	0	0	0	0	0	0	0	0	0	0	0	0	0	0	0	0	0	0	0	WBGene00003999
C05A9.2	0	0	0	0	0	0	0	1	0	0	0	0	0	0	0	0	0	0	0	0	WBGene00007317
C05B10.1	0	0	0	0	1	1	0	0	0	1	0	0	0	1	0	0	0	0	0	0	WBGene00003043
C05B5.1	0	0	0	0	0	0	0	0	0	0	0	0	0	0	0	0	0	0	0	0	WBGene00007319
C05B5.11	0	0	0	0	0	0	0	0	0	0	0	0	0	0	0	0	0	0	0	0	WBGene00045242
C05B5.12	0	0	0	0	0	0	0	0	0	0	0	0	0	0	0	0	0	0	0	0	WBGene00194886
C05B5.16	0	0	1	0	0	0	0	0	0	0	0	0	0	0	0	0	0	0	0	0	WBGene00219280
C05B5.17	0	0	0	0	0	0	0	0	0	0	0	0	0	0	0	0	0	0	0	0	WBGene00219314
C05B5.2	0	0	0	0	0	0	0	0	0	0	0	0	0	0	0	0	0	0	0	0	WBGene00007320
C05B5.3	0	0	0	0	0	0	0	0	0	0	2	0	0	0	0	0	0	0	1	0	WBGene00004100
C05B5.4	0	0	0	0	0	0	0	0	0	2	0	0	0	0	0	0	0	2	1	2	WBGene00007321
C05B5.5	0	0	0	0	0	0	0	0	0	0	0	0	0	0	0	0	0	0	0	0	WBGene00007322
C05B5.6	0	0	0	0	0	0	0	0	0	0	0	0	0	0	0	0	0	0	0	0	WBGene00007323
C05B5.7	0	0	0	0	0	0	0	0	0	0	0	0	0	0	0	0	0	0	0	0	WBGene00004344
C05B5.8	0	0	0	0	0	0	0	0	0	2	0	0	0	0	0	0	0	0	0	0	WBGene00007324
C05C10.1	0	0	0	0	0	0	0	0	0	0	0	0	0	0	0	0	0	0	0	0	WBGene00007328
C05C10.2	4	16	16	37	58	33	7	10	9	22	3	6	18	28	25	18	15	6	7	13	WBGene00007329
C05C10.3	2	16	17	32	34	23	4	4	3	18	2	10	14	23	28	22	9	4	7	14	WBGene00007330
C05C10.4	0	0	0	0	0	0	0	0	0	0	0	0	0	0	0	0	1	0	0	0	WBGene00007331
C05C10.5	6	20	47	112	391	330	57	55	126	227	5	10	44	84	246	159	86	53	82	50	WBGene00007332
C05C10.6	5	44	62	81	133	75	13	16	29	62	12	28	54	68	92	65	25	16	16	25	WBGene00007333
C05C10.7	4	18	24	29	35	27	2	0	1	1	4	6	19	19	14	3	1	0	0	0	WBGene00007334
C05C10.8	0	0	0	0	0	0	0	0	0	0	0	0	0	0	0	0	0	0	0	0	WBGene00086567
C05C12.1	0	0	0	0	0	0	0	0	0	0	0	0	0	0	0	0	0	0	0	0	WBGene00007335
C05C12.3	0	0	0	0	0	0	0	0	0	0	0	0	0	0	0	0	0	0	0	0	WBGene00001795
C05C12.4	0	0	1	0	0	0	0	0	0	0	0	0	0	0	0	0	0	0	0	0	WBGene00007336
C05C12.5	0	0	0	0	0	0	0	0	0	0	0	0	0	0	0	0	0	0	0	0	WBGene00007337
C05C12.6	0	0	0	0	0	1	1	0	0	0	0	0	0	0	0	0	1	0	0	1	WBGene00007338
C05C8.1	4	13	12	19	41	26	4	3	6	14	3	5	16	28	27	13	10	4	9	1	WBGene00015460
C05C8.2	14	50	47	43	52	36	5	6	11	32	15	38	45	49	43	35	7	4	11	5	WBGene00015461
C05C8.3	0	0	2	0	0	0	0	0	0	0	0	0	1	0	0	0	0	0	0	0	WBGene00001428
C05C8.4	5	24	34	46	50	38	1	4	13	26	6	9	25	38	46	18	12	4	18	7	WBGene00001563
C05C8.5	4	25	32	86	103	67	11	12	22	47	2	15	42	35	39	35	11	15	15	4	WBGene00015462
C05C8.6	26	95	126	219	263	180	24	23	68	128	22	61	103	137	163	61	53	32	42	27	WBGene00015463
C05C8.7	0	0	0	0	0	0	0	0	0	0	0	0	2	0	1	1	0	0	0	0	WBGene00015464
C05C8.8	0	0	0	0	0	0	0	0	0	0	0	0	0	0	0	0	0	0	0	0	WBGene00015465
C05C8.9	1	17	10	30	35	27	1	6	2	16	2	5	14	13	14	10	7	0	6	5	WBGene00015466
C05C9.1	0	0	0	0	0	0	0	0	0	0	0	0	0	0	0	0	0	0	0	0	WBGene00007325
C05C9.2	0	0	0	0	0	0	0	0	0	0	0	0	0	0	0	0	0	0	0	0	WBGene00007326
C05C9.3	1	0	0	0	1	0	0	0	0	0	0	0	0	1	0	0	0	0	0	0	WBGene00007327
C05D10.1	0	0	0	0	0	3	0	4	2	8	0	1	0	0	0	1	7	1	3	5	WBGene00015477
C05D10.2	0	0	0	1	0	0	0	0	0	0	0	0	0	0	0	0	0	0	0	0	WBGene00015478
C05D10.3	0	0	0	0	0	0	0	0	0	0	0	0	0	0	0	0	0	0	0	0	WBGene00015479
C05D10.4	0	0	1	0	2	0	1	0	1	1	0	2	0	0	2	3	0	0	2	0	WBGene00015480
C05D11.1	18	72	95	65	90	70	5	20	17	47	19	40	34	100	91	29	29	4	19	11	WBGene00015481
C05D11.10	3	18	17	30	21	19	2	3	3	11	8	6	12	21	20	7	1	0	5	0	WBGene00015487
C05D11.11	16	51	66	143	257	142	17	20	69	132	20	41	63	147	175	64	61	35	61	46	WBGene00003214
C05D11.12	3	22	42	48	85	69	10	11	21	42	4	14	27	38	63	36	28	7	29	18	WBGene00002855
C05D11.13	1	6	2	6	1	17	2	4	1	8	0	3	1	5	13	10	4	3	3	1	WBGene00015488
C05D11.2	0	8	29	22	21	16	1	3	3	5	2	6	12	18	31	13	6	7	6	5	WBGene00006516
C05D11.3	12	24	47	54	92	48	8	8	17	40	10	6	22	75	73	29	16	9	13	14	WBGene00006515
C05D11.4	0	0	0	0	0	0	0	0	0	0	0	0	0	0	0	0	0	0	0	0	WBGene00002881
C05D11.5	0	0	0	0	0	0	0	0	0	0	0	0	0	0	0	1	2	0	0	0	WBGene00015483
C05D11.6	0	0	0	0	1	1	0	0	0	0	0	0	1	0	0	0	0	0	0	0	WBGene00003523
C05D11.7	5	14	19	31	40	37	0	4	14	27	2	16	13	14	38	23	11	10	10	3	WBGene00015484
C05D11.8	0	2	1	3	4	1	0	0	0	0	0	2	1	3	4	0	0	0	0	0	WBGene00015485
C05D11.9	6	20	17	25	25	19	3	3	5	24	6	10	16	20	21	12	4	2	6	1	WBGene00015486
C05D12.1	0	0	0	0	0	0	0	0	0	0	0	0	0	1	0	0	0	0	0	0	WBGene00007339
C05D12.2	0	0	0	0	0	0	0	0	0	0	0	0	0	0	0	0	0	0	0	0	WBGene00007340
C05D12.3	0	0	0	0	0	0	0	0	0	0	0	0	0	0	0	0	0	0	0	0	WBGene00014666
C05D12.4	0	0	0	0	0	0	0	0	0	0	0	0	0	0	0	0	0	0	0	0	WBGene00007341
C05D12.5	0	0	0	0	0	0	0	0	0	0	0	0	0	0	0	0	0	0	0	0	WBGene00007342
C05D12.7	0	0	0	0	0	0	0	0	0	0	0	0	0	0	0	0	0	0	0	0	WBGene00044029
C05D2.1	0	0	1	0	2	20	6	4	14	22	0	0	0	0	8	7	6	6	13	5	WBGene00000900
C05D2.10	12	41	66	80	123	108	9	16	32	45	11	27	58	79	112	57	22	17	39	13	WBGene00015470
C05D2.3	0	0	0	0	0	0	0	0	0	0	0	0	0	0	0	0	0	0	0	0	WBGene00015467
C05D2.4	0	0	0	0	0	0	0	0	0	0	0	0	0	0	0	0	0	0	0	0	WBGene00000239
C05D2.5	11	51	70	111	112	68	6	16	27	50	12	28	53	74	76	41	10	11	19	14	WBGene00001514
C05D2.6	4	10	26	28	29	41	6	6	6	28	2	6	15	14	29	12	7	4	5	3	WBGene00015468
C05D2.8	0	2	0	0	2	2	0	1	1	0	2	1	1	0	1	2	1	2	0	0	WBGene00015469
C05D9.1	0	0	2	0	1	15	5	5	9	14	0	1	0	0	5	22	10	6	3	6	WBGene00004927
C05D9.2	0	0	0	0	0	0	0	0	0	0	0	0	0	0	0	0	0	0	0	0	WBGene00015471
C05D9.3	0	0	0	0	0	0	0	0	0	0	0	0	0	0	0	0	0	0	0	0	WBGene00015472
C05D9.4	0	0	0	0	0	0	0	0	0	0	0	0	0	0	0	0	0	0	0	0	WBGene00015473
C05D9.5	0	0	0	0	0	6	2	0	1	3	0	0	0	0	1	9	3	2	4	4	WBGene00002062
C05D9.7	0	0	1	0	0	7	0	0	2	7	0	0	0	0	0	11	4	3	2	1	WBGene00015474
C05D9.9	0	0	0	0	0	0	0	0	0	0	0	0	0	0	0	0	0	0	0	0	WBGene00015476
C05E11.1	0	0	0	2	0	17	9	0	4	10	0	0	0	0	9	15	11	3	5	4	WBGene00015492
C05E11.2	0	0	0	0	0	0	0	0	0	0	0	0	0	0	0	0	0	0	0	0	WBGene00015493
C05E11.3	0	0	0	0	0	1	0	0	1	1	0	0	0	0	0	3	0	0	0	0	WBGene00015494
C05E11.4	0	0	0	0	0	0	0	0	0	0	0	0	0	0	0	0	0	0	0	0	WBGene00000133
C05E11.5	0	0	0	0	0	0	1	0	0	0	0	0	0	0	0	0	0	0	0	0	WBGene00000136
C05E11.6	0	0	0	0	0	0	0	0	0	0	0	0	0	0	0	0	0	0	0	0	WBGene00015495
C05E11.7	0	0	0	0	0	0	0	0	0	0	0	0	0	0	0	0	0	0	1	0	WBGene00015496
C05E11.8	0	0	0	0	0	0	0	0	0	0	0	0	0	0	0	0	0	0	0	0	WBGene00001455
C05E4.1	0	0	0	0	0	0	0	0	0	0	0	0	0	0	0	0	1	0	0	1	WBGene00005643
C05E4.10	0	0	0	0	0	0	0	0	0	0	0	0	0	0	0	0	0	0	0	0	WBGene00005613
C05E4.11	0	0	0	0	0	0	0	0	0	0	0	0	0	0	0	0	0	0	0	0	WBGene00005612
C05E4.12	0	0	0	0	0	0	0	0	0	0	0	0	0	0	0	0	0	0	0	0	WBGene00015491
C05E4.13	0	0	0	0	0	0	0	0	0	0	0	0	0	0	0	0	0	0	0	0	WBGene00006288
C05E4.14	0	0	0	0	0	0	0	0	0	0	0	0	0	0	0	0	0	0	0	0	WBGene00005228
C05E4.15	0	0	0	0	0	0	0	0	0	0	0	0	0	0	0	0	0	0	0	0	WBGene00206359
C05E4.2	0	0	0	0	0	0	0	0	0	0	0	0	0	0	0	0	0	0	0	0	WBGene00006087
C05E4.3	0	0	0	0	0	0	0	0	0	0	0	0	0	0	0	0	0	0	0	0	WBGene00005642
C05E4.4	0	0	0	0	0	0	0	0	0	0	0	0	0	0	0	0	0	0	0	0	WBGene00005516
C05E4.6	0	0	0	0	0	0	0	0	0	0	0	0	0	0	0	0	0	0	0	0	WBGene00006182
C05E4.7	0	0	0	0	0	0	0	0	0	0	0	0	0	0	0	0	0	0	0	0	WBGene00015489
C05E4.9	0	0	3	0	0	0	0	0	0	0	0	0	0	0	0	0	0	0	0	0	WBGene00001564
C05E7.1	0	0	0	0	0	0	0	0	0	0	0	0	0	0	0	0	0	0	0	0	WBGene00007343
C05E7.2	0	0	0	0	0	0	0	0	0	0	0	0	0	0	0	0	0	0	0	0	WBGene00007344
C05E7.3	0	0	0	0	0	0	0	0	0	0	0	0	0	0	0	0	0	0	0	0	WBGene00007345
C05E7.4	0	0	0	0	0	0	0	0	0	0	0	0	0	0	0	0	0	0	0	0	WBGene00007346
C05G5.1	0	0	0	0	0	0	0	0	0	0	0	0	0	0	0	0	0	0	0	0	WBGene00007347
C05G5.2	0	0	0	0	0	3	0	2	1	4	0	0	0	1	7	2	4	1	2	0	WBGene00007348
C05G5.3	0	0	0	0	0	1	1	0	1	6	0	0	0	1	1	0	3	0	2	2	WBGene00007349
C05G5.4	0	1	3	3	2	24	1	1	9	25	0	0	0	3	4	19	16	8	12	8	WBGene00007350
C05G5.5	0	0	0	0	0	0	0	0	0	0	0	0	0	0	0	0	0	0	0	0	WBGene00007351
C05G5.7	0	0	0	0	0	0	0	0	0	0	0	0	0	0	0	0	0	0	0	0	WBGene00050939
C05G6.1	0	0	0	0	0	1	0	0	1	0	0	0	0	0	1	0	1	0	2	0	WBGene00015497
C05H8.1	0	0	1	0	0	0	0	0	0	2	0	1	0	0	1	0	1	0	0	0	WBGene00000518
C06A1.1	38	122	279	332	440	331	36	68	106	243	46	100	222	317	322	177	95	81	136	93	WBGene00007352
C06A1.2	0	0	0	0	0	0	0	0	0	0	0	0	0	0	0	0	0	0	0	0	WBGene00007353
C06A1.3	0	0	0	0	0	1	0	0	0	0	1	0	0	0	0	0	0	0	0	0	WBGene00007354
C06A1.5	18	86	122	102	143	75	15	11	19	64	27	36	88	102	95	27	38	12	21	15	WBGene00007355
C06A1.6	0	0	0	0	0	0	0	0	0	0	0	0	0	0	0	0	0	0	0	0	WBGene00007356
C06A1.7	0	0	0	0	0	0	0	0	0	0	0	0	0	0	0	0	0	0	0	0	WBGene00044235
C06A12.3	0	0	0	0	0	1	0	0	0	1	0	0	0	0	0	0	0	1	2	2	WBGene00007357
C06A12.4	0	0	0	0	0	0	0	0	0	0	0	0	0	0	0	0	0	0	0	0	WBGene00001550
C06A12.5	0	0	0	0	0	0	0	0	0	0	0	0	0	0	0	0	0	0	0	0	WBGene00007358
C06A12.8	0	0	0	0	0	0	0	0	0	0	0	0	0	0	0	0	0	0	0	0	WBGene00007359
C06A5.1	1	4	4	4	7	1	1	2	0	2	0	0	2	3	4	3	1	1	1	0	WBGene00015499
C06A5.10	0	1	2	1	2	3	0	1	1	2	0	0	1	1	4	0	1	0	0	0	WBGene00015506
C06A5.11	4	6	19	33	29	28	1	3	8	19	3	9	14	13	17	11	3	1	4	1	WBGene00004803
C06A5.12	0	0	6	8	9	9	2	0	2	6	0	2	3	5	6	3	1	1	0	1	WBGene00044414
C06A5.2	1	0	0	0	1	0	0	0	0	0	0	0	0	0	0	2	0	0	1	0	WBGene00015500
C06A5.3	6	42	39	67	80	65	7	11	15	42	4	19	35	49	72	33	18	11	18	16	WBGene00015501
C06A5.4	4	11	19	5	9	1	1	1	1	1	2	7	0	7	3	2	0	0	0	0	WBGene00015502
C06A5.5	1	3	6	9	16	6	1	0	0	0	1	6	5	8	9	1	1	0	0	0	WBGene00015503
C06A5.6	23	54	122	118	176	109	18	18	31	69	27	56	63	100	165	46	28	31	38	20	WBGene00015504
C06A5.7	2	3	36	36	44	27	4	6	13	34	5	6	23	20	34	19	13	5	8	3	WBGene00006823
C06A5.8	2	1	15	22	29	21	2	2	2	8	1	5	10	11	18	10	2	9	4	3	WBGene00015505
C06A5.9	4	45	52	61	54	27	7	3	16	20	4	11	42	37	58	26	11	6	7	4	WBGene00004380
C06A6.2	0	0	1	0	0	4	2	0	2	7	0	0	0	0	2	6	3	1	2	2	WBGene00015507
C06A6.3	7	18	16	38	38	49	11	7	11	26	3	13	15	22	28	14	15	1	5	2	WBGene00015508
C06A6.4	10	27	33	71	144	99	3	12	16	55	7	16	35	56	89	41	26	22	26	11	WBGene00015509
C06A6.5	0	0	0	1	0	11	5	0	4	18	0	0	1	1	3	12	4	1	6	2	WBGene00015510
C06A6.7	0	0	0	0	0	0	0	0	0	0	0	0	0	0	0	0	0	0	0	0	WBGene00015511
C06A8.1	26	77	70	105	106	88	5	10	31	72	36	45	75	77	94	47	25	14	14	20	WBGene00015512
C06A8.2	1	13	15	25	22	18	2	3	6	16	1	8	18	12	22	8	4	1	1	2	WBGene00015513
C06A8.3	0	1	3	1	1	8	0	2	7	7	0	0	0	0	5	9	5	2	3	1	WBGene00015514
C06A8.4	2	25	35	38	58	23	5	6	7	29	4	6	16	29	39	15	10	6	7	14	WBGene00004823
C06A8.5	8	58	68	70	91	71	9	9	16	38	14	23	56	85	83	27	14	4	12	4	WBGene00015515
C06A8.6	0	0	0	0	0	0	0	0	0	0	0	0	0	0	0	0	0	0	0	0	WBGene00015516
C06A8.7	0	0	0	0	0	0	0	0	0	0	0	0	0	0	0	0	0	0	0	0	WBGene00005262
C06A8.8	0	0	1	0	0	0	0	0	0	0	0	0	0	0	0	1	0	0	0	0	WBGene00015517
C06A8.9	0	0	0	0	0	0	0	0	0	0	0	0	0	0	0	0	0	0	0	0	WBGene00001615
C06B3.1	0	0	0	0	0	0	0	0	0	0	0	0	0	0	0	0	0	0	0	0	WBGene00007360
C06B3.10	0	0	0	0	0	0	0	0	0	0	0	0	0	0	0	0	0	0	0	0	WBGene00006277
C06B3.11	0	0	0	0	0	0	0	0	0	0	0	0	0	0	0	0	0	0	0	0	WBGene00005933
C06B3.12	0	0	0	0	0	0	0	0	0	0	0	0	0	0	0	0	0	0	0	0	WBGene00044114
C06B3.13	0	0	0	0	0	0	0	0	0	0	0	0	0	0	0	0	0	0	0	0	WBGene00044115
C06B3.14	0	0	0	0	0	0	0	0	0	0	0	0	0	0	0	0	0	0	0	0	WBGene00044116
C06B3.16	0	0	0	0	0	0	0	0	0	0	0	0	0	0	0	0	0	0	0	0	WBGene00189947
C06B3.2	0	0	0	0	0	0	0	0	0	0	0	0	0	0	0	0	0	0	0	0	WBGene00007361
C06B3.3	1	0	0	0	0	0	0	0	0	0	0	0	0	0	0	0	0	0	0	0	WBGene00007362
C06B3.4	0	0	0	0	0	9	2	2	5	9	1	0	0	0	3	19	3	2	2	2	WBGene00007363
C06B3.5	0	0	0	0	0	0	0	0	0	0	0	0	0	0	0	0	0	0	0	0	WBGene00007364
C06B3.6	1	0	0	0	0	1	2	1	0	0	0	0	0	0	0	1	0	0	0	0	WBGene00007365
C06B3.7	0	0	0	0	0	0	0	0	0	0	0	0	0	0	0	0	0	0	0	0	WBGene00007366
C06B3.8	0	0	0	0	0	0	0	0	0	0	0	0	0	0	0	0	0	0	0	0	WBGene00001552
C06B3.9	0	0	0	0	0	0	0	0	0	0	0	0	0	0	0	0	0	0	0	0	WBGene00006278
C06B8.1	0	0	0	0	0	0	0	0	0	0	0	0	0	0	0	0	0	0	0	0	WBGene00007367
C06B8.10	0	0	0	0	0	0	0	0	0	0	0	0	0	0	0	0	0	0	0	0	WBGene00005428
C06B8.11	0	0	0	0	0	0	0	0	0	0	0	0	0	0	0	0	0	0	0	0	WBGene00007373
C06B8.2	0	0	0	0	0	0	0	0	0	0	0	0	0	0	0	0	0	0	0	0	WBGene00007368
C06B8.3	0	0	0	0	0	0	0	0	0	0	0	0	0	0	0	0	0	0	0	0	WBGene00007369
C06B8.4	0	0	0	0	0	0	0	0	0	0	0	0	0	0	0	0	0	0	0	0	WBGene00007370
C06B8.6	0	0	0	0	0	0	0	0	0	0	0	0	0	0	0	0	0	0	0	0	WBGene00005429
C06B8.7	0	0	0	0	0	0	0	0	0	1	0	0	0	0	0	0	0	0	0	1	WBGene00007372
C06B8.8	259	628	762	669	743	574	94	38	40	36	298	320	586	780	454	202	50	3	8	3	WBGene00004452
C06B8.9	0	0	0	0	0	0	0	0	0	0	0	0	0	0	0	0	0	0	0	0	WBGene00005768
C06C3.1	5	22	31	41	58	61	9	12	12	37	6	18	31	53	47	46	19	9	16	14	WBGene00003196
C06C3.10	0	0	0	0	0	0	0	0	0	0	0	0	0	0	1	0	0	0	0	0	WBGene00044169
C06C3.12	0	0	0	0	0	0	0	0	0	0	0	0	0	0	0	0	0	0	0	0	WBGene00175031
C06C3.3	0	0	0	0	0	0	0	0	0	0	0	0	0	0	0	0	0	0	0	0	WBGene00007374
C06C3.4	0	0	0	0	0	0	0	0	0	0	0	0	0	0	0	0	0	0	0	0	WBGene00007375
C06C3.6	0	0	0	0	0	0	0	0	2	0	0	0	0	0	0	0	0	0	0	0	WBGene00005271
C06C3.7	0	0	0	0	0	0	0	0	0	0	0	0	0	0	0	0	0	0	0	0	WBGene00007377
C06C3.8	0	0	0	0	0	0	0	0	0	0	0	0	0	0	1	0	0	0	0	0	WBGene00007378
C06C3.9	0	0	0	0	0	0	0	0	0	0	0	0	0	0	0	0	0	0	0	0	WBGene00014668
C06C6.1	0	0	0	0	0	0	0	0	0	0	0	0	0	0	0	0	0	0	0	0	WBGene00007379
C06C6.2	0	0	0	0	0	0	0	0	0	0	0	0	0	0	0	0	0	0	0	0	WBGene00006264
C06C6.3	0	0	0	0	0	0	0	0	0	0	0	0	0	0	0	0	0	0	0	0	WBGene00006262
C06C6.4	0	0	0	0	0	0	0	0	0	0	0	0	0	0	0	0	0	0	0	0	WBGene00003653
C06C6.5	0	0	0	0	0	0	0	0	0	0	0	0	0	0	0	0	0	0	0	0	WBGene00003640
C06C6.6	0	0	0	0	0	0	0	0	0	0	0	0	0	0	0	0	0	0	0	0	WBGene00007380
C06C6.7	0	0	0	0	0	0	0	0	0	0	0	0	0	0	0	0	0	0	0	0	WBGene00007381
C06C6.8	0	0	0	0	0	0	0	0	0	0	0	0	0	0	0	0	0	0	0	0	WBGene00007382
C06C6.9	0	0	0	0	0	0	0	0	0	0	0	0	0	0	0	0	0	0	0	0	WBGene00007383
C06E1.1	0	0	0	1	0	0	0	0	1	4	0	0	0	0	0	2	0	1	1	2	WBGene00015518
C06E1.10	2	26	18	19	16	19	2	4	3	10	3	3	10	23	12	10	6	1	10	4	WBGene00015525
C06E1.11	1	3	2	2	2	0	0	0	1	0	0	0	0	2	1	0	0	0	0	0	WBGene00015526
C06E1.3	0	0	0	0	0	0	0	0	0	0	0	0	0	0	0	0	0	0	0	0	WBGene00015519
C06E1.4	0	0	0	0	0	0	0	0	0	0	0	0	0	0	0	0	0	0	0	0	WBGene00001612
C06E1.5	0	0	0	0	0	0	0	0	0	0	0	0	0	0	0	0	0	0	0	0	WBGene00015520
C06E1.6	0	0	0	0	0	0	0	0	0	0	0	0	0	0	0	0	0	0	0	2	WBGene00015521
C06E1.7	0	0	0	0	0	0	0	0	0	0	0	0	0	0	0	0	0	0	0	0	WBGene00015522
C06E1.8	0	0	0	0	0	0	0	0	0	0	0	0	0	0	0	0	0	0	0	0	WBGene00015523
C06E1.9	8	26	30	66	51	40	6	4	4	26	3	20	31	31	47	28	11	12	12	9	WBGene00015524
C06E2.1	0	0	0	0	1	0	0	0	0	0	0	0	0	0	0	0	0	0	0	0	WBGene00015527
C06E2.2	0	0	0	0	0	0	0	0	0	0	0	0	0	0	0	0	0	0	0	0	WBGene00015528
C06E2.3	0	0	0	0	0	0	0	0	0	0	0	0	0	0	0	0	0	0	0	0	WBGene00006716
C06E2.5	0	0	0	0	0	8	2	1	5	12	0	0	0	0	1	9	2	1	0	2	WBGene00015529
C06E2.7	0	0	0	0	0	0	0	0	0	0	0	0	0	0	0	0	0	0	0	0	WBGene00006717
C06E2.8	0	0	0	0	0	0	0	0	0	0	0	0	0	0	0	0	0	0	0	0	WBGene00002092
C06E2.9	0	0	0	0	0	0	0	0	0	0	0	0	0	0	0	0	0	0	0	0	WBGene00044579
C06E4.1	0	0	0	0	0	0	0	0	0	0	0	0	0	0	0	0	0	0	0	0	WBGene00015530
C06E4.2	0	0	0	0	0	0	1	0	0	1	0	0	0	0	0	1	0	0	0	1	WBGene00015531
C06E4.3	0	0	0	0	0	0	0	0	0	0	0	0	0	0	0	0	0	0	0	0	WBGene00015532
C06E4.4	0	0	0	0	0	0	0	0	0	0	0	0	0	0	0	0	0	0	0	0	WBGene00015533
C06E4.5	0	0	0	0	0	0	0	0	0	0	0	0	0	0	0	0	0	0	0	0	WBGene00015534
C06E4.6	0	0	0	0	0	0	0	0	0	0	0	0	0	0	0	0	0	0	0	0	WBGene00015535
C06E4.7	0	0	0	0	0	0	0	0	0	0	0	0	0	0	0	0	0	0	0	0	WBGene00015536
C06E4.8	0	0	0	0	0	0	0	0	0	0	0	0	0	0	0	0	0	0	0	0	WBGene00015537
C06E7.1	72	183	260	321	332	182	29	39	78	143	92	138	157	186	194	105	46	40	34	23	WBGene00015538
C06E7.2	0	0	0	0	0	0	0	0	0	0	0	0	0	0	0	0	0	0	0	0	WBGene00015539
C06E7.3	53	115	156	247	312	249	51	52	118	182	35	56	95	143	158	79	84	80	94	33	WBGene00015540
C06E7.4	0	1	0	0	1	3	0	0	0	3	0	0	1	0	1	4	1	0	0	0	WBGene00015541
C06E7.6	0	0	0	0	0	0	0	0	0	0	0	0	0	0	0	0	0	0	0	0	WBGene00004973
C06E7.7	0	0	0	0	0	0	0	0	0	0	0	0	0	0	0	0	0	0	0	0	WBGene00005728
C06E7.88	0	0	0	0	0	0	0	0	0	0	0	0	0	0	0	0	0	0	0	0	WBGene00189995
C06E8.3	0	0	0	0	2	11	3	0	0	5	0	0	0	0	6	5	3	1	0	1	WBGene00004182
C06E8.5	0	0	0	0	0	0	0	0	0	0	0	0	0	0	0	0	0	0	0	0	WBGene00015544
C06G1.1	0	0	0	0	0	0	0	0	0	0	0	0	0	0	0	0	0	0	0	0	WBGene00015545
C06G1.2	0	0	1	0	0	0	0	0	0	0	0	0	0	0	0	0	0	0	0	0	WBGene00015546
C06G1.4	0	0	2	2	2	17	5	7	7	18	0	0	0	1	9	21	8	6	11	10	WBGene00015547
C06G1.5	0	0	2	0	0	1	0	1	0	0	0	0	0	0	0	0	2	0	0	3	WBGene00015548
C06G1.6	0	0	0	0	0	0	0	0	0	0	0	0	0	0	0	0	0	0	0	0	WBGene00077591
C06G3.1	0	0	0	0	0	0	0	1	0	1	0	0	0	0	0	0	0	0	0	0	WBGene00003695
C06G3.10	1	14	15	31	47	42	5	3	5	20	3	17	20	18	42	13	3	3	10	4	WBGene00000585
C06G3.11	5	33	51	34	34	20	1	4	1	10	12	13	16	28	17	9	5	1	2	0	WBGene00006572
C06G3.2	2	11	42	38	53	19	4	5	5	12	12	14	31	28	39	15	7	4	6	6	WBGene00002228
C06G3.3	0	0	0	0	0	0	0	1	0	0	0	0	0	0	0	0	0	0	0	0	WBGene00015549
C06G3.4	1	0	0	0	0	0	0	0	0	0	0	0	0	0	0	0	0	0	0	0	WBGene00015550
C06G3.5	0	0	0	1	1	3	1	4	2	2	0	0	0	2	1	4	1	5	5	0	WBGene00015551
C06G3.6	0	3	3	1	1	13	2	2	3	12	0	3	0	0	4	9	2	3	3	5	WBGene00015552
C06G3.7	10	21	38	27	40	26	2	6	8	12	8	11	24	25	24	15	6	6	5	1	WBGene00015553
C06G3.8	1	14	16	20	26	12	1	3	6	18	6	8	15	17	13	16	8	9	2	2	WBGene00015554
C06G3.9	4	18	31	74	75	68	9	6	18	38	11	30	29	41	71	31	17	9	11	12	WBGene00015555
C06G4.1	3	11	13	25	33	19	3	4	10	16	6	9	16	17	30	12	5	6	3	4	WBGene00015557
C06G4.2	10	23	45	68	101	55	4	5	21	37	8	24	27	41	65	28	24	18	19	8	WBGene00000542
C06G4.4	0	0	1	0	0	0	0	0	0	0	0	0	0	0	0	0	0	0	0	0	WBGene00015558
C06G4.5	0	0	0	0	0	0	0	0	0	2	0	0	0	0	0	0	0	0	0	0	WBGene00015559
C06G4.6	0	0	0	0	0	0	0	0	0	0	0	0	0	0	0	0	0	0	0	0	WBGene00044446
C06G8.1	0	0	1	0	0	0	0	0	0	0	0	0	0	1	0	0	0	0	0	0	WBGene00007384
C06G8.2	0	0	0	0	0	0	0	0	0	0	0	0	0	0	0	0	0	0	0	0	WBGene00003876
C06G8.3	0	0	0	0	0	0	0	0	0	0	0	0	0	0	0	0	0	0	0	0	WBGene00014669
C06G8.4	0	0	0	0	0	0	0	0	0	0	0	0	0	0	0	0	0	0	0	0	WBGene00005085
C06H2.1	40	186	207	233	220	168	14	39	58	110	53	87	129	250	192	66	61	24	78	50	WBGene00007385
C06H2.2	0	15	19	20	20	13	4	1	6	7	3	4	10	17	22	13	3	5	1	1	WBGene00007386
C06H2.3	3	3	16	17	23	16	3	0	8	10	4	3	12	7	17	6	2	1	3	3	WBGene00007387
C06H2.4	0	0	1	0	1	3	0	2	0	0	0	0	0	1	0	1	2	0	1	1	WBGene00007388
C06H2.5	0	0	0	0	0	0	0	0	0	0	0	0	0	0	0	0	0	0	0	0	WBGene00007389
C06H2.6	8	34	115	150	168	109	22	20	46	101	24	17	56	76	100	49	38	17	29	32	WBGene00007390
C06H2.7	0	0	0	1	17	59	9	8	14	36	0	0	0	1	22	34	18	6	8	6	WBGene00007391
C06H5.1	0	0	0	0	0	0	0	0	0	0	0	0	0	0	0	0	0	0	0	0	WBGene00007392
C06H5.11	0	0	0	0	0	0	0	0	0	0	0	0	0	0	0	0	0	0	0	0	WBGene00206499
C06H5.2	0	0	0	0	0	0	0	0	0	0	0	0	0	0	0	0	0	0	0	0	WBGene00007393
C06H5.6	0	0	0	0	0	1	0	0	0	0	0	0	0	0	0	1	0	0	0	0	WBGene00007394
C06H5.7	0	1	0	1	0	1	0	0	0	0	0	0	0	1	0	0	0	0	0	0	WBGene00007395
C06H5.8	0	0	0	0	0	3	0	0	0	1	0	0	0	0	2	0	0	0	0	0	WBGene00044795
C07A12.1	0	0	0	0	0	0	0	0	0	0	0	0	0	0	0	0	0	0	0	0	WBGene00001821
C07A12.18	0	0	0	0	0	0	0	0	0	0	0	0	0	0	0	0	0	0	0	0	WBGene00206364
C07A12.2	0	0	0	0	0	0	0	0	0	0	0	0	0	0	0	0	0	0	0	0	WBGene00015560
C07A12.3	0	0	0	1	0	0	1	1	2	5	0	0	0	0	0	5	3	0	2	2	WBGene00003628
C07A12.4	1	5	19	19	30	155	36	48	66	117	0	2	2	23	50	106	102	54	96	36	WBGene00003963
C07A12.5	0	0	0	1	0	15	1	0	6	17	0	0	0	0	0	14	2	2	10	4	WBGene00005008
C07A12.7	0	0	0	0	0	7	2	0	3	3	0	0	0	0	1	7	2	2	2	2	WBGene00015561
C07A4.1	0	0	0	0	0	0	0	0	0	0	0	0	0	0	0	0	0	0	0	0	WBGene00007396
C07A4.2	0	0	0	0	0	0	0	0	0	0	0	0	0	0	0	0	0	0	0	0	WBGene00007397
C07A4.3	0	0	0	0	0	0	0	0	0	0	0	0	0	0	0	0	0	0	0	0	WBGene00007398
C07A9.1	0	0	0	0	0	0	0	0	0	0	0	0	0	0	0	0	0	0	0	0	WBGene00007399
C07A9.10	0	0	0	0	0	0	0	0	0	0	0	0	0	0	0	0	0	0	0	0	WBGene00007406
C07A9.11	0	0	1	0	1	0	0	0	1	0	0	0	0	0	1	0	0	0	0	0	WBGene00003572
C07A9.12	0	0	0	0	0	0	0	0	0	0	0	0	0	0	0	0	0	0	0	0	WBGene00043994
C07A9.13	0	0	0	0	0	0	0	0	0	0	0	0	0	0	0	0	0	0	0	0	WBGene00044227
C07A9.2	4	25	42	77	60	43	9	12	20	38	5	23	34	31	37	24	20	4	16	9	WBGene00007400
C07A9.3	2	14	13	39	46	40	4	6	5	28	8	7	10	20	44	24	16	12	11	7	WBGene00006579
C07A9.4	0	0	0	0	0	0	0	0	0	0	0	0	0	0	0	0	0	0	0	0	WBGene00003571
C07A9.5	0	0	0	0	0	0	0	0	0	0	0	0	0	0	0	0	0	0	0	0	WBGene00007401
C07A9.6	0	0	0	0	0	0	0	0	0	0	0	0	0	2	0	0	0	0	0	0	WBGene00007402
C07A9.7	4	14	22	36	30	30	7	0	4	6	1	6	20	25	39	13	9	5	1	5	WBGene00007403
C07A9.8	0	0	0	0	0	0	0	0	0	0	0	0	0	0	0	0	0	0	0	0	WBGene00007404
C07A9.9	0	0	0	0	0	21	2	2	2	6	2	0	0	0	5	5	1	3	0	0	WBGene00007405
C07B5.2	0	0	0	0	0	0	0	0	0	0	0	0	0	0	0	0	0	0	0	0	WBGene00007407
C07B5.3	0	0	0	0	0	0	0	0	0	0	0	0	0	0	0	0	0	0	0	0	WBGene00007408
C07B5.4	0	0	0	0	0	0	0	0	0	0	0	0	0	0	0	0	0	0	0	0	WBGene00007409
C07B5.5	0	0	2	0	0	0	0	0	0	0	0	0	0	2	0	0	0	0	0	0	WBGene00003828
C07B5.6	0	0	0	0	0	0	0	0	0	0	0	0	0	0	0	0	0	0	0	0	WBGene00007410
C07B5.8	0	0	0	0	0	0	0	0	0	0	0	0	0	0	0	0	0	0	0	0	WBGene00195209
C07C7.1	0	0	0	0	0	0	0	0	0	0	0	0	0	0	0	0	0	0	0	0	WBGene00007411
C07D10.1	0	0	0	0	0	0	0	0	0	0	0	0	0	0	0	0	1	0	0	0	WBGene00015566
C07D10.2	6	30	38	63	91	79	7	8	31	43	8	17	34	41	66	38	19	16	21	18	WBGene00015567
C07D10.3	0	0	0	0	0	0	0	0	0	0	0	0	0	0	0	0	0	0	0	0	WBGene00015568
C07D10.4	0	0	0	0	0	0	0	0	0	0	0	0	0	0	0	0	0	0	0	0	WBGene00003526
C07D10.5	0	1	3	2	0	5	1	4	1	16	0	0	1	0	3	6	2	2	4	0	WBGene00015569
C07D10.6	0	0	0	0	0	0	0	0	0	0	0	0	0	0	0	0	0	0	0	0	WBGene00044673
C07D8.5	0	0	0	0	0	0	0	0	0	0	0	0	0	0	0	0	0	0	0	0	WBGene00015564
C07D8.6	0	7	6	9	15	342	44	82	108	254	2	3	1	5	133	199	122	74	160	114	WBGene00015565
C07E3.1	1	12	12	55	37	39	4	0	7	13	15	11	16	11	55	18	4	5	12	5	WBGene00007412
C07E3.10	0	0	0	0	0	0	0	0	0	0	0	0	0	0	0	0	0	0	0	0	WBGene00007420
C07E3.2	5	41	44	50	38	27	4	4	3	25	17	20	22	50	39	15	12	7	10	5	WBGene00007413
C07E3.3	0	0	0	0	0	0	0	0	0	0	0	0	0	0	0	0	0	0	0	0	WBGene00007414
C07E3.4	0	0	0	0	0	0	0	0	0	0	0	0	0	0	0	0	0	0	0	0	WBGene00007415
C07E3.5	0	0	0	0	0	0	0	0	0	0	0	0	0	0	0	0	0	0	0	0	WBGene00007416
C07E3.6	0	0	0	0	7	32	1	0	5	12	0	0	0	0	14	4	2	4	0	0	WBGene00007417
C07E3.8	0	0	0	0	0	0	0	0	0	0	0	0	0	0	0	0	0	0	0	0	WBGene00007418
C07E3.9	0	1	1	0	1	2	1	2	10	6	0	0	0	1	0	2	4	5	15	6	WBGene00007419
C07F11.1	1	12	38	36	63	40	9	9	11	45	3	7	23	34	35	32	31	14	12	12	WBGene00006593
C07F11.2	0	0	0	0	0	0	0	0	0	0	0	0	0	0	0	0	0	0	0	0	WBGene00015570
C07G1.1	0	0	0	0	0	0	0	0	0	0	0	0	0	0	0	0	0	0	1	0	WBGene00006620
C07G1.2	0	0	0	0	0	0	0	0	0	0	0	0	0	0	0	0	0	0	0	0	WBGene00015571
C07G1.3	12	67	97	119	145	113	25	22	32	77	14	46	58	62	116	73	35	25	35	27	WBGene00003961
C07G1.4	18	47	73	125	142	92	8	15	31	76	13	35	61	75	108	45	19	25	24	30	WBGene00006957
C07G1.5	3	13	20	33	26	19	2	4	10	13	4	3	15	18	35	24	13	9	6	6	WBGene00004101
C07G1.6	0	0	0	0	0	0	0	0	0	0	0	0	0	0	0	0	0	0	0	0	WBGene00015572
C07G1.7	0	0	0	0	0	0	0	0	0	0	0	0	0	0	0	0	0	0	0	0	WBGene00015573
C07G1.8	10	19	26	27	27	28	3	5	14	16	5	15	23	29	26	17	9	6	11	3	WBGene00044608
C07G2.1	22	45	196	647	908	815	258	241	495	704	25	93	387	567	796	558	487	475	558	277	WBGene00000465
C07G2.2	13	42	72	67	88	67	4	17	26	47	6	30	39	52	90	34	19	10	25	13	WBGene00000223
C07G2.3	54	181	236	229	319	207	32	36	65	153	71	64	118	251	224	104	54	40	71	42	WBGene00000380
C07G3.10	0	0	1	0	0	1	0	0	0	0	0	0	0	2	0	0	0	0	1	0	WBGene00015578
C07G3.2	0	0	0	0	0	0	0	0	0	1	0	0	0	0	0	1	0	0	0	0	WBGene00015574
C07G3.3	0	0	0	0	0	0	0	0	0	0	0	0	0	0	0	0	0	0	0	0	WBGene00006258
C07G3.4	0	0	0	0	0	0	0	0	0	0	0	0	0	0	0	0	0	0	0	0	WBGene00006257
C07G3.5	0	0	0	0	0	0	0	0	0	0	0	0	0	0	0	0	0	0	0	0	WBGene00006259
C07G3.6	0	0	0	0	0	0	0	0	0	0	0	0	0	0	0	0	0	0	0	0	WBGene00006256
C07G3.8	0	0	0	0	3	1	0	0	0	0	0	1	0	0	0	0	0	0	0	0	WBGene00015576
C07G3.9	4	12	18	23	26	22	2	0	8	13	3	6	8	9	19	11	11	5	6	1	WBGene00015577
C07H4.1	0	0	0	0	0	0	0	0	0	0	0	0	0	0	0	0	0	1	0	2	WBGene00007421
C07H4.2	11	28	63	89	107	77	10	15	21	42	10	34	42	59	89	43	32	31	45	15	WBGene00000532
C07H6.1	2	3	5	15	28	10	4	2	5	6	2	1	9	16	31	7	4	5	2	0	WBGene00002986
C07H6.2	6	22	50	58	72	46	10	6	12	28	6	8	22	49	43	15	8	7	19	4	WBGene00015579
C07H6.3	0	1	0	0	0	1	0	1	0	0	0	0	0	0	0	0	0	0	0	0	WBGene00015580
C07H6.4	6	32	39	68	43	37	12	8	13	17	10	28	31	35	65	28	6	7	18	8	WBGene00015581
C07H6.5	8	29	48	62	64	34	3	12	7	20	3	16	15	41	31	11	5	4	6	6	WBGene00000479
C07H6.6	13	59	64	130	126	79	11	19	25	64	8	18	60	95	122	61	35	25	35	16	WBGene00000537
C07H6.7	0	0	2	0	0	5	0	1	2	3	0	0	0	1	2	1	0	0	1	0	WBGene00003024
C07H6.8	5	8	13	27	26	11	1	3	3	9	4	13	17	14	18	18	3	2	8	0	WBGene00000854
C07H6.9	0	0	1	1	0	0	0	0	0	0	0	0	0	0	2	0	0	0	0	0	WBGene00015582
C08A9.1	0	0	0	0	0	0	0	0	0	0	0	0	0	0	0	0	0	0	0	0	WBGene00004932
C08A9.10	0	0	0	0	0	0	0	0	0	0	0	0	0	0	0	0	0	0	0	0	WBGene00044773
C08A9.3	0	0	0	0	0	0	0	0	0	0	0	0	0	0	0	0	0	0	0	0	WBGene00015583
C08A9.6	0	0	0	0	0	4	1	1	1	5	0	0	0	0	0	5	4	0	1	0	WBGene00015586
C08A9.7	0	0	0	0	0	0	0	0	0	0	0	0	0	0	0	0	0	0	0	0	WBGene00015587
C08A9.8	0	0	0	0	0	2	0	0	0	0	0	0	0	0	1	0	1	0	0	0	WBGene00015588
C08A9.9	0	0	0	0	0	3	0	0	0	0	0	0	0	0	1	1	0	0	0	0	WBGene00015589
C08B11.1	1	19	61	101	186	146	33	35	41	112	4	15	30	64	148	94	73	55	50	45	WBGene00006996
C08B11.2	6	15	18	50	64	33	5	3	10	26	6	11	36	30	46	32	13	11	12	8	WBGene00001835
C08B11.3	10	44	74	119	145	120	13	30	50	84	11	28	66	83	135	91	46	47	39	27	WBGene00007433
C08B11.4	0	0	0	0	0	0	0	0	0	1	0	0	0	0	0	0	0	0	0	1	WBGene00003813
C08B11.5	5	22	38	50	43	29	4	6	7	18	13	14	17	35	36	28	11	9	9	8	WBGene00004723
C08B11.6	2	17	16	27	36	30	6	2	6	18	3	5	14	29	24	14	7	3	7	5	WBGene00007434
C08B11.7	9	42	55	78	97	70	5	6	30	48	17	34	46	73	87	16	12	7	17	8	WBGene00006724
C08B11.8	3	12	17	29	30	31	1	2	13	18	3	8	14	11	14	13	5	3	6	4	WBGene00007435
C08B11.9	10	32	32	58	89	62	4	9	7	29	14	16	26	64	74	30	22	13	10	5	WBGene00007436
C08B6.1	0	0	0	0	0	0	0	0	0	0	0	0	0	0	0	0	0	0	0	0	WBGene00007422
C08B6.10	0	0	0	0	0	0	0	0	0	0	0	0	0	0	1	0	0	0	0	0	WBGene00007430
C08B6.11	0	0	0	0	0	0	0	0	0	0	0	0	0	0	0	0	0	0	0	0	WBGene00007431
C08B6.12	0	0	0	0	0	0	0	0	0	0	0	0	0	0	0	0	0	0	0	0	WBGene00007432
C08B6.13	0	0	0	0	0	0	0	0	0	0	0	0	0	0	0	0	0	0	0	0	WBGene00044012
C08B6.14	0	0	0	0	0	0	0	0	0	0	0	0	0	0	0	0	0	0	0	0	WBGene00044044
C08B6.2	0	0	0	0	0	0	0	0	0	0	0	0	0	0	0	0	0	0	0	0	WBGene00007423
C08B6.3	0	0	0	0	0	0	0	0	0	0	0	0	0	0	0	0	0	0	0	0	WBGene00007424
C08B6.4	0	0	0	0	0	1	0	0	0	0	0	0	0	0	0	0	0	0	0	0	WBGene00007425
C08B6.5	0	0	0	0	0	0	0	0	0	0	0	0	0	0	0	0	0	0	0	0	WBGene00007426
C08B6.6	0	0	0	0	0	0	0	0	0	0	0	0	0	0	0	0	0	0	0	0	WBGene00007427
C08B6.7	15	65	108	121	214	159	25	20	30	109	17	47	65	137	175	103	59	40	50	29	WBGene00007428
C08B6.8	15	15	24	34	34	31	3	5	10	24	5	9	21	27	24	5	4	6	1	2	WBGene00007429
C08B6.9	18	67	67	100	111	79	13	20	23	69	19	29	71	60	86	50	34	8	18	20	WBGene00000142
C08C3.1	0	0	0	0	0	0	0	0	0	0	0	0	0	0	0	0	0	0	0	0	WBGene00001174
C08C3.2	4	5	13	20	34	30	3	4	7	17	4	6	16	14	31	11	10	1	5	6	WBGene00015590
C08C3.3	0	0	0	0	0	1	0	0	0	0	0	0	0	0	0	0	0	0	0	0	WBGene00003102
C08C3.4	17	57	81	96	105	71	5	10	18	55	17	38	57	42	69	23	18	5	14	3	WBGene00015591
C08D8.1	0	0	0	0	0	0	0	0	0	0	0	0	0	0	0	0	0	0	0	0	WBGene00015592
C08D8.2	0	0	0	1	0	0	0	0	2	2	0	0	0	1	1	0	1	0	1	1	WBGene00006582
C08E3.1	0	0	0	0	0	0	0	0	0	0	0	0	0	0	0	0	0	0	0	0	WBGene00015593
C08E3.10	0	0	0	0	0	0	0	0	0	0	0	0	0	0	0	0	0	0	0	0	WBGene00015602
C08E3.11	0	0	0	0	0	0	0	0	0	0	0	0	0	0	0	0	0	0	0	0	WBGene00015603
C08E3.12	0	0	0	0	0	0	0	0	0	0	0	0	0	0	0	0	0	0	0	0	WBGene00015604
C08E3.13	0	0	0	0	0	0	0	0	0	0	0	0	0	0	0	0	0	0	0	0	WBGene00015605
C08E3.14	0	0	0	0	0	0	0	0	0	0	0	0	0	0	0	0	0	0	0	0	WBGene00044415
C08E3.15	0	0	0	0	0	0	0	0	0	0	0	0	0	0	0	0	0	0	0	0	WBGene00044416
C08E3.2	0	0	0	0	0	0	0	0	0	0	0	0	0	0	0	0	0	0	0	0	WBGene00015594
C08E3.3	0	0	0	0	0	0	0	0	0	0	0	0	0	0	0	0	0	0	0	0	WBGene00015595
C08E3.4	0	0	0	0	0	0	0	0	0	0	0	0	0	0	0	0	0	0	0	0	WBGene00015596
C08E3.5	0	0	0	0	0	0	0	0	0	0	0	0	0	0	0	0	0	0	0	0	WBGene00015597
C08E3.6	0	0	0	0	0	0	0	0	0	0	0	0	0	0	0	0	0	0	0	0	WBGene00015598
C08E3.7	0	0	0	0	0	0	0	0	0	0	0	0	0	0	0	0	0	0	0	0	WBGene00015599
C08E3.8	0	0	0	0	0	0	0	0	0	0	0	0	0	0	0	0	0	0	0	0	WBGene00015600
C08E3.9	0	0	0	0	0	0	0	0	0	0	0	0	0	0	0	0	0	0	0	0	WBGene00015601
C08E8.1	0	0	0	0	0	0	0	0	0	0	0	0	0	0	0	0	0	0	0	0	WBGene00007437
C08E8.10	0	0	0	0	0	0	0	0	0	1	0	0	0	0	0	0	0	0	0	0	WBGene00077692
C08E8.11	0	0	0	0	0	0	0	0	0	0	0	0	0	0	0	0	0	0	0	0	WBGene00119201
C08E8.2	0	0	0	0	0	0	0	0	0	0	0	0	0	0	0	0	0	0	0	0	WBGene00007438
C08E8.3	0	0	0	0	0	0	0	0	0	0	0	0	0	0	0	0	0	0	0	0	WBGene00007439
C08E8.4	0	0	0	0	0	0	0	0	0	0	0	0	0	0	0	0	0	0	0	0	WBGene00007440
C08E8.5	0	0	0	0	0	0	0	0	0	0	0	0	0	0	0	0	0	0	0	0	WBGene00007441
C08E8.6	0	0	0	0	0	0	0	0	0	0	0	0	0	0	0	0	0	0	0	0	WBGene00007442
C08E8.9	0	0	0	0	0	0	0	0	0	0	0	0	0	0	0	0	0	0	0	0	WBGene00050891
C08F1.1	0	0	0	0	0	0	0	0	0	0	0	0	0	0	0	0	0	0	0	0	WBGene00015606
C08F1.10	0	0	1	1	1	1	0	0	0	1	0	0	0	0	0	0	0	1	0	0	WBGene00015613
C08F1.11	0	0	1	0	1	0	0	0	1	0	0	0	0	0	0	0	0	0	0	0	WBGene00044417
C08F1.3	0	0	0	0	0	0	0	0	0	0	0	0	0	0	0	0	0	0	0	0	WBGene00015607
C08F1.4	0	0	0	0	0	0	0	0	0	0	0	0	0	0	0	0	0	0	0	0	WBGene00015608
C08F1.5	0	0	0	0	0	0	0	0	0	0	0	0	0	0	0	0	0	0	0	0	WBGene00015609
C08F1.6	0	1	2	0	0	0	0	0	0	0	0	0	0	1	0	0	0	0	1	0	WBGene00015610
C08F1.8	0	0	0	0	0	0	0	0	0	0	0	0	0	0	0	0	0	0	0	0	WBGene00015611
C08F11.1	0	0	0	0	0	0	0	0	0	0	0	0	0	0	0	0	0	0	0	0	WBGene00007450
C08F11.10	0	0	0	0	0	0	0	0	0	0	0	0	0	0	0	0	0	0	0	0	WBGene00007457
C08F11.11	0	0	0	0	0	0	0	0	0	0	0	0	0	0	0	0	0	0	0	0	WBGene00007458
C08F11.12	0	0	0	0	0	0	0	0	0	0	0	0	0	0	0	0	0	0	0	0	WBGene00007459
C08F11.13	0	0	0	0	0	0	0	0	0	0	0	0	0	0	0	0	0	0	0	0	WBGene00007460
C08F11.17	0	0	0	0	0	0	0	0	0	0	0	0	0	0	0	0	0	0	0	0	WBGene00045069
C08F11.2	0	0	0	0	0	0	0	0	0	0	0	0	0	0	0	0	0	0	0	0	WBGene00007451
C08F11.3	0	0	0	0	0	0	0	0	0	0	0	0	0	0	0	0	0	0	0	0	WBGene00007452
C08F11.4	0	0	0	0	0	0	0	0	0	0	0	0	0	0	0	0	0	0	0	0	WBGene00005684
C08F11.5	0	0	0	0	0	0	0	0	0	0	0	0	0	0	0	0	0	0	0	0	WBGene00007453
C08F11.7	0	1	0	0	1	0	0	0	0	0	0	0	0	0	0	0	0	0	0	0	WBGene00007454
C08F11.8	0	0	0	0	0	0	0	0	0	0	0	0	0	0	0	0	0	0	0	0	WBGene00007455
C08F11.9	0	0	0	0	0	0	0	0	0	0	0	0	0	0	0	0	0	0	0	0	WBGene00007456
C08F8.1	23	123	130	181	188	133	9	13	26	55	41	73	79	166	132	69	25	13	15	14	WBGene00007443
C08F8.15	0	0	0	0	0	0	0	0	0	0	0	0	0	0	0	0	0	0	0	0	WBGene00219217
C08F8.2	3	21	12	30	27	12	1	2	8	9	3	4	9	19	22	9	7	4	6	1	WBGene00007444
C08F8.3	4	10	23	39	92	63	3	15	16	52	6	10	21	43	80	20	16	7	14	5	WBGene00007445
C08F8.4	0	0	0	0	0	0	0	0	0	0	0	0	0	0	0	0	0	0	0	0	WBGene00007446
C08F8.5	0	0	0	0	0	0	0	0	0	0	0	0	0	0	0	0	0	0	0	0	WBGene00007447
C08F8.6	0	0	0	0	0	0	0	0	0	0	0	0	0	0	0	0	0	0	0	0	WBGene00007448
C08F8.7	0	0	0	0	0	0	0	0	0	0	0	0	1	1	0	0	0	0	0	0	WBGene00004309
C08F8.8	0	0	1	0	0	0	0	0	0	0	0	0	0	0	2	0	0	0	0	0	WBGene00003657
C08F8.9	14	36	37	35	39	30	3	1	1	7	3	10	10	48	21	9	3	2	1	2	WBGene00007449
C08G5.1	0	0	0	0	0	0	0	0	0	0	0	0	0	0	0	0	0	0	0	0	WBGene00015614
C08G5.2	0	0	0	0	0	0	0	0	0	0	0	0	0	0	0	0	0	0	0	0	WBGene00015615
C08G5.3	0	0	0	0	0	0	0	0	0	0	0	0	0	0	0	0	0	0	0	0	WBGene00015616
C08G5.4	0	1	0	0	0	1	0	0	0	0	0	0	0	0	0	0	0	0	0	0	WBGene00004926
C08G5.6	0	0	0	0	0	0	0	0	0	0	0	0	0	0	0	0	0	0	0	0	WBGene00015618
C08G5.7	0	0	0	0	0	0	0	0	0	0	0	0	0	0	0	0	0	0	0	1	WBGene00044418
C08G9.1	0	0	0	0	0	0	0	0	0	1	0	0	0	0	0	0	0	0	1	0	WBGene00015619
C08G9.2	0	0	0	0	0	0	0	0	0	1	0	0	0	0	0	0	0	0	0	1	WBGene00015620
C08H9.1	0	0	0	0	0	0	0	0	0	0	0	0	0	0	0	0	0	0	0	0	WBGene00007462
C08H9.10	0	0	0	0	0	0	0	0	0	0	0	0	0	0	0	0	0	0	0	0	WBGene00007469
C08H9.11	0	0	0	0	0	0	0	0	0	0	0	0	0	0	0	0	0	0	0	0	WBGene00007470
C08H9.12	0	0	0	0	0	0	0	0	0	0	0	0	0	0	0	0	0	0	0	0	WBGene00007471
C08H9.13	0	0	0	0	0	0	0	0	0	0	0	0	0	0	0	0	0	0	0	0	WBGene00007472
C08H9.14	0	0	0	0	0	0	0	0	0	0	0	0	0	0	0	0	0	0	0	0	WBGene00007473
C08H9.15	0	0	0	0	0	0	0	0	1	0	0	0	0	0	0	0	0	0	0	0	WBGene00007474
C08H9.16	0	13	18	27	23	19	4	4	8	16	6	8	24	13	16	20	9	4	2	4	WBGene00086566
C08H9.18	0	0	0	0	0	0	0	0	0	0	0	0	0	0	0	0	0	0	0	0	WBGene00206395
C08H9.2	10	74	151	246	251	185	37	43	75	127	8	46	96	194	204	94	54	39	66	66	WBGene00007463
C08H9.3	1	19	13	35	25	19	2	2	3	7	6	7	13	16	42	16	9	5	11	1	WBGene00007464
C08H9.4	0	0	0	0	0	0	0	0	0	0	0	0	0	0	0	0	0	0	0	0	WBGene00007465
C08H9.5	0	0	0	0	0	0	0	0	0	0	0	0	0	0	0	0	0	0	0	0	WBGene00003862
C08H9.6	0	0	0	0	0	0	0	0	0	0	0	0	0	0	0	0	0	0	0	0	WBGene00007466
C08H9.7	0	0	0	0	0	0	0	0	0	0	0	0	0	1	0	0	0	0	0	0	WBGene00007467
C09B7.1	0	0	0	0	0	0	0	1	3	2	0	0	0	0	0	1	1	2	0	0	WBGene00004780
C09B7.2	0	1	0	2	5	8	4	3	2	14	0	0	2	5	4	10	9	5	6	3	WBGene00015621
C09B8.1	0	0	0	0	0	0	0	0	1	0	0	0	0	0	0	0	0	0	1	2	WBGene00002146
C09B8.3	0	0	0	0	0	0	0	0	0	0	0	0	0	0	0	0	0	0	0	0	WBGene00015622
C09B8.4	0	1	1	2	2	10	2	5	3	3	0	0	0	4	2	4	7	3	2	2	WBGene00015623
C09B8.5	0	0	0	0	0	1	1	0	1	7	0	0	0	0	0	0	0	5	1	1	WBGene00015624
C09B8.6	0	0	0	0	3	0	2	1	1	2	1	0	0	0	0	1	3	1	3	1	WBGene00002023
C09B8.7	0	1	2	0	1	5	2	7	5	12	0	0	0	2	6	13	2	1	7	3	WBGene00003911
C09B8.8	0	0	0	0	0	1	0	0	0	0	0	0	0	0	0	0	0	0	0	0	WBGene00015625
C09B9.1	0	0	0	0	0	0	0	0	0	0	0	0	0	0	0	0	0	0	0	0	WBGene00015626
C09B9.2	0	0	0	0	0	0	0	0	0	0	0	0	0	0	0	0	0	0	0	0	WBGene00015627
C09B9.3	0	0	0	0	0	0	0	0	0	0	0	0	0	0	0	0	0	0	0	0	WBGene00015628
C09B9.4	0	0	0	0	0	0	0	0	0	0	0	0	0	0	0	0	0	0	0	0	WBGene00015629
C09B9.6	0	0	0	0	0	0	0	0	0	0	0	0	0	0	0	0	0	0	0	0	WBGene00003448
C09B9.7	0	0	0	0	0	0	0	0	0	0	0	0	0	0	0	0	0	0	0	0	WBGene00015630
C09B9.8	0	0	0	0	0	0	0	0	0	0	0	0	0	0	0	0	0	0	0	0	WBGene00044484
C09C7.1	0	0	0	0	0	0	0	0	0	0	0	0	0	0	0	0	0	0	0	0	WBGene00006981
C09D1.1	0	0	3	1	0	0	0	0	0	2	0	0	0	0	0	0	0	0	0	0	WBGene00006820
C09D1.2	0	0	0	0	0	0	0	0	0	0	0	0	0	0	0	0	0	0	0	0	WBGene00015631
C09D4.1	0	0	0	0	0	1	0	0	0	1	0	0	0	0	0	1	0	0	0	0	WBGene00015632
C09D4.2	0	0	1	0	0	0	0	0	0	1	0	0	0	0	0	0	0	0	0	0	WBGene00015633
C09D4.3	0	0	0	0	0	0	0	0	0	0	0	0	0	0	0	0	0	0	0	0	WBGene00015634
C09D4.4	9	72	68	96	133	67	12	14	31	65	19	43	38	57	68	45	20	23	28	20	WBGene00015635
C09D4.5	229	584	679	647	706	472	56	31	43	32	313	368	557	705	586	328	104	11	14	10	WBGene00004431
C09D4.6	0	0	0	0	0	0	0	0	0	0	0	0	0	0	0	0	0	0	0	0	WBGene00015636
C09D4.9	1	0	0	0	0	0	0	0	0	0	0	0	0	0	0	0	0	0	0	0	WBGene00206357
C09D8.1	1	0	2	0	2	17	3	3	6	14	0	0	0	0	11	14	12	7	8	1	WBGene00004215
C09E10.2	0	0	0	0	0	0	0	0	0	0	0	0	0	0	2	0	0	0	0	0	WBGene00000958
C09E7.1	0	0	0	0	0	0	0	0	0	0	0	0	0	0	0	0	0	0	0	0	WBGene00015637
C09E7.10	0	0	0	0	0	0	0	0	0	0	0	0	0	0	0	0	0	0	0	0	WBGene00044295
C09E7.2	0	0	0	0	0	0	0	0	0	0	0	0	0	0	0	0	0	0	0	0	WBGene00004102
C09E7.3	0	0	0	0	0	0	0	0	0	0	0	0	0	0	0	0	0	0	0	0	WBGene00003859
C09E7.4	1	3	0	1	0	18	4	1	4	4	0	0	0	1	7	12	5	4	3	3	WBGene00015638
C09E7.5	0	0	0	0	1	0	0	0	0	0	0	0	0	0	0	0	0	0	0	0	WBGene00015639
C09E7.6	0	0	1	0	0	0	0	0	0	0	0	0	1	1	1	0	0	0	0	0	WBGene00015640
C09E7.7	2	11	13	19	33	10	2	3	0	4	1	7	18	20	33	9	2	1	1	1	WBGene00015641
C09E7.8	3	3	6	15	26	20	1	2	2	11	2	4	10	15	27	6	4	3	3	2	WBGene00015642
C09E7.9	0	3	4	2	4	7	1	2	0	3	2	4	5	1	4	3	0	0	1	0	WBGene00015643
C09E8.1	0	0	0	0	0	6	2	0	0	0	0	0	0	0	0	2	0	0	1	0	WBGene00015644
C09E8.2	0	0	0	0	0	0	0	0	0	0	0	0	0	0	0	0	0	0	0	0	WBGene00015645
C09E8.3	0	0	0	0	0	0	1	1	2	4	0	0	0	0	1	2	3	2	1	2	WBGene00015646
C09E8.4	0	0	0	0	3	1	0	0	0	0	0	0	0	0	3	2	0	0	0	0	WBGene00206410
C09E9.1	1	6	14	19	18	28	5	4	7	13	0	2	7	7	12	13	6	4	3	4	WBGene00007476
C09F12.1	0	0	0	0	0	0	0	0	0	0	0	0	0	0	0	0	0	0	0	0	WBGene00000522
C09F12.2	0	0	0	0	0	0	0	0	0	0	0	0	0	0	0	0	0	0	0	0	WBGene00007482
C09F12.3	0	0	0	0	0	0	0	0	0	0	0	0	0	0	0	0	0	0	0	0	WBGene00007483
C09F5.1	0	1	0	0	0	27	3	0	11	11	0	1	0	0	12	19	5	3	11	5	WBGene00015647
C09F5.2	1	4	6	10	6	14	3	1	5	20	4	4	1	4	18	10	6	1	4	3	WBGene00015648
C09F5.3	0	0	0	0	0	0	0	0	0	0	0	0	0	0	0	0	0	0	0	0	WBGene00015649
C09F9.1	0	0	0	0	0	0	0	0	0	0	0	0	0	0	0	0	0	0	0	0	WBGene00007478
C09F9.2	0	0	0	0	0	0	0	0	0	0	0	0	0	0	0	0	0	0	0	0	WBGene00007479
C09F9.3	0	0	0	0	0	0	0	0	0	0	0	0	0	0	0	0	0	1	0	2	WBGene00007480
C09G1.1	0	0	0	0	0	0	0	0	0	0	0	0	0	0	0	0	0	0	0	0	WBGene00004103
C09G1.2	0	0	0	0	0	0	0	0	0	0	0	0	0	0	0	0	0	0	0	0	WBGene00007484
C09G1.3	0	0	0	0	0	0	0	0	1	0	0	1	0	0	0	0	0	0	0	0	WBGene00007485
C09G1.4	0	1	0	0	0	1	0	0	0	1	0	0	0	0	0	0	0	0	1	0	WBGene00007486
C09G1.5	0	0	1	0	0	0	0	0	2	1	0	0	0	0	0	1	0	0	0	0	WBGene00007487
C09G12.1	0	0	0	0	0	0	0	0	0	0	0	0	0	0	0	0	0	0	0	0	WBGene00015651
C09G12.10	0	0	0	0	0	0	0	0	0	0	0	0	0	0	0	0	0	0	0	0	WBGene00023462
C09G12.11	0	0	0	0	0	0	0	0	0	0	0	0	0	0	0	0	0	0	0	0	WBGene00023463
C09G12.16	0	0	0	0	0	0	0	0	0	0	0	0	0	0	0	0	0	0	0	0	WBGene00023474
C09G12.17	0	0	0	0	0	0	0	0	0	0	0	0	0	0	0	0	0	0	0	0	WBGene00044470
C09G12.2	0	0	0	0	0	0	0	0	0	0	0	0	0	0	0	0	0	0	0	0	WBGene00015652
C09G12.3	0	0	0	0	0	0	0	0	0	0	0	0	0	0	0	0	0	0	0	0	WBGene00015653
C09G12.5	0	0	0	0	0	0	0	0	0	0	0	0	0	0	0	0	0	0	0	0	WBGene00015655
C09G12.6	0	0	0	0	0	0	0	0	0	0	0	0	0	0	0	0	0	0	0	0	WBGene00015656
C09G12.8	2	14	20	20	26	25	5	3	8	21	2	7	9	11	21	14	1	2	8	8	WBGene00000424
C09G12.9	0	0	0	1	0	0	0	0	0	0	0	0	1	0	0	0	0	0	0	0	WBGene00015658
C09G4.1	3	12	14	40	34	19	1	5	3	10	0	7	7	4	15	11	6	3	1	1	WBGene00002043
C09G4.2	1	0	3	6	10	3	5	3	7	4	2	0	0	4	3	3	8	4	10	6	WBGene00015650
C09G4.3	19	49	88	145	221	164	20	39	63	150	20	47	97	105	170	109	71	44	80	56	WBGene00001051
C09G4.4	9	41	45	53	135	71	11	6	18	43	9	20	39	50	84	52	19	16	13	5	WBGene00044001
C09G4.5	0	0	0	0	0	0	0	0	0	0	0	0	0	1	0	0	0	0	0	0	WBGene00003224
C09G5.1	0	0	0	0	0	0	0	0	0	0	0	0	0	0	0	0	0	0	0	0	WBGene00001586
C09G5.13	0	0	0	0	0	0	0	0	0	0	0	0	0	0	0	0	0	0	0	0	WBGene00206538
C09G5.2	10	40	35	63	47	42	3	14	10	31	16	19	41	48	43	21	13	11	13	4	WBGene00007488
C09G5.3	0	0	0	0	0	0	0	0	0	0	0	0	0	0	0	0	0	0	0	0	WBGene00000655
C09G5.4	0	0	0	0	0	0	0	0	0	0	0	0	0	0	0	0	0	0	0	0	WBGene00000616
C09G5.5	0	1	1	2	0	0	0	0	0	0	0	0	0	0	0	0	0	0	0	0	WBGene00000656
C09G5.6	0	0	0	0	0	0	0	0	0	0	0	0	0	0	0	0	0	0	0	0	WBGene00000251
C09G5.7	0	0	0	0	0	1	0	0	0	0	0	0	0	0	1	1	2	0	0	0	WBGene00007489
C09G5.8	0	0	0	0	0	0	0	0	0	0	0	0	0	0	0	0	0	0	0	0	WBGene00007490
C09G9.1	3	14	33	40	70	44	6	5	22	24	7	14	13	19	43	14	10	5	21	5	WBGene00007492
C09G9.2	5	26	55	54	82	56	6	14	17	38	11	16	35	45	60	26	13	12	20	11	WBGene00007493
C09G9.3	0	0	0	0	0	0	0	0	0	0	0	0	0	0	0	0	0	0	0	0	WBGene00007494
C09G9.4	0	0	0	0	0	0	0	0	0	0	0	0	0	0	0	0	0	0	0	0	WBGene00006409
C09G9.5	0	0	0	0	0	0	0	0	0	0	0	0	0	0	0	0	0	0	0	0	WBGene00007495
C09G9.6	16	56	144	254	405	309	45	62	109	196	11	73	113	141	267	164	90	66	136	92	WBGene00003864
C09G9.7	0	0	0	0	0	0	0	0	0	0	0	0	0	0	0	0	0	0	0	0	WBGene00007496
C09G9.8	0	0	0	0	0	0	0	0	0	0	0	0	0	0	0	0	0	0	0	0	WBGene00007497
C09H10.1	0	0	0	0	0	0	0	0	0	0	0	0	0	0	0	0	0	0	0	0	WBGene00004455
C09H10.10	4	19	27	35	40	28	2	1	5	19	6	8	26	18	34	16	2	4	3	8	WBGene00007504
C09H10.2	188	506	564	538	631	474	67	32	27	21	222	253	479	663	384	176	43	9	7	5	WBGene00004454
C09H10.3	15	76	91	72	80	43	5	9	17	40	18	22	40	61	67	38	20	5	15	12	WBGene00003831
C09H10.4	1	0	1	0	0	1	0	0	0	0	0	0	0	0	0	0	0	0	0	0	WBGene00043120
C09H10.5	1	0	0	0	0	0	0	0	0	0	0	0	0	0	0	0	0	0	0	0	WBGene00007499
C09H10.6	3	30	45	77	79	62	8	10	14	58	19	22	50	45	74	43	27	12	21	11	WBGene00007500
C09H10.7	0	0	0	0	1	0	0	0	0	0	0	1	1	2	0	0	1	0	0	0	WBGene00007501
C09H10.8	0	0	0	0	0	0	0	0	0	0	0	0	0	0	0	0	0	0	0	0	WBGene00007502
C09H10.9	0	0	0	0	0	0	0	0	0	0	0	0	0	0	0	0	0	0	0	0	WBGene00007503
C09H5.1	0	0	0	0	0	0	0	0	0	0	0	0	0	0	0	0	0	0	0	0	WBGene00015659
C09H5.2	1	0	0	0	0	0	0	0	0	0	0	0	0	0	0	0	0	0	0	0	WBGene00015660
C09H5.3	0	0	0	0	0	0	0	0	0	0	0	0	0	0	0	0	0	0	0	0	WBGene00006188
C09H5.4	0	0	0	0	0	0	0	0	0	0	0	0	0	0	0	0	0	0	0	0	WBGene00006190
C09H5.5	0	0	0	0	0	0	0	0	0	0	0	0	0	0	0	0	0	0	0	0	WBGene00006191
C09H5.6	0	0	0	0	0	0	0	0	0	0	0	0	0	0	0	0	0	0	0	0	WBGene00006180
C09H5.7	0	0	0	0	0	0	0	0	0	0	0	0	0	0	0	0	0	0	0	0	WBGene00015661
C09H5.9	0	0	0	0	0	0	0	0	0	0	0	0	0	0	0	0	0	0	0	0	WBGene00006179
C09H6.1	0	11	28	40	54	46	6	5	12	18	4	3	20	32	37	31	17	19	25	5	WBGene00005009
C09H6.2	0	0	4	0	0	2	0	3	2	8	0	0	1	1	1	3	1	1	0	0	WBGene00002999
C09H6.3	7	22	27	37	38	30	3	6	10	29	1	11	14	29	36	20	2	2	6	2	WBGene00003136
C10A4.1	0	0	0	0	0	3	1	0	0	1	0	0	0	0	0	2	0	0	0	0	WBGene00015662
C10A4.10	0	0	0	0	0	0	0	0	0	0	0	0	0	0	0	0	0	0	0	0	WBGene00050957
C10A4.13	0	0	0	0	0	0	0	0	0	0	0	0	0	0	0	0	0	0	0	0	WBGene00206485
C10A4.2	0	0	0	0	0	0	0	0	0	0	0	0	0	0	0	0	0	0	0	0	WBGene00015663
C10A4.3	0	0	0	0	0	0	0	0	0	0	1	0	0	0	0	0	0	0	0	0	WBGene00015664
C10A4.4	0	0	0	0	0	0	0	0	0	0	0	0	0	0	0	0	0	0	0	0	WBGene00015665
C10A4.5	0	0	0	0	1	0	0	0	0	1	0	0	0	0	0	0	2	1	0	0	WBGene00015666
C10A4.6	0	0	0	0	1	0	1	0	0	1	0	0	0	0	0	0	0	0	2	0	WBGene00015667
C10A4.7	0	0	0	0	0	0	1	0	0	0	0	0	0	0	0	0	0	0	0	0	WBGene00015668
C10A4.8	0	0	1	0	0	0	0	0	0	0	0	0	0	2	1	0	0	0	0	0	WBGene00003380
C10A4.9	0	0	0	0	0	0	0	0	0	0	0	0	0	0	0	0	0	0	0	0	WBGene00045456
C10B5.1	3	7	9	14	13	9	1	0	3	3	2	7	10	7	10	0	4	1	3	3	WBGene00015670
C10B5.3	0	0	0	0	0	0	0	0	0	0	0	0	0	0	0	0	0	0	0	0	WBGene00015671
C10C5.1	0	1	0	0	1	0	0	0	0	0	0	0	0	0	0	0	0	0	0	0	WBGene00007505
C10C5.2	0	0	0	0	0	0	0	0	0	0	0	0	0	0	0	0	0	0	0	0	WBGene00007506
C10C5.3	0	0	1	0	0	0	0	0	0	0	0	0	0	0	0	0	0	0	0	0	WBGene00007507
C10C5.4	0	0	0	0	0	0	0	0	0	0	0	0	0	0	0	0	0	0	0	0	WBGene00007508
C10C5.5	0	0	0	0	0	0	0	0	0	0	0	0	0	0	0	0	0	0	0	0	WBGene00007509
C10C5.6	8	40	51	68	96	62	9	21	19	43	11	20	37	49	71	54	22	16	32	14	WBGene00000911
C10C5.7	0	0	0	0	0	0	0	0	0	0	0	0	0	0	0	0	0	0	0	0	WBGene00007511
C10C6.1	8	62	88	154	154	118	26	20	53	93	12	48	81	94	127	81	52	55	45	33	WBGene00002192
C10C6.2	0	0	0	0	0	0	0	0	0	0	0	0	0	0	0	0	0	0	0	0	WBGene00007006
C10C6.3	0	0	0	0	0	0	0	0	0	0	0	0	0	0	0	0	0	0	0	0	WBGene00007512
C10C6.5	2	15	22	32	41	29	0	3	6	19	5	5	15	20	44	9	9	5	14	6	WBGene00007513
C10C6.6	6	19	47	42	50	60	12	6	10	40	7	17	40	35	39	33	12	17	26	7	WBGene00007514
C10C6.7	0	0	0	1	1	2	0	0	0	0	0	1	0	1	3	0	0	0	1	0	WBGene00007515
C10E2.1	0	0	0	0	0	0	0	0	0	0	0	0	0	0	0	0	0	0	0	0	WBGene00015672
C10E2.2	0	0	0	0	0	0	0	0	0	0	0	0	0	0	0	0	0	1	1	1	WBGene00015673
C10E2.3	0	0	0	0	0	0	0	0	0	0	0	0	0	0	0	0	0	0	0	0	WBGene00001837
C10E2.4	0	0	0	0	0	0	0	0	0	1	0	0	0	0	0	0	0	1	0	0	WBGene00015674
C10E2.5	0	0	0	0	0	0	0	0	0	0	0	0	0	0	0	0	0	0	0	0	WBGene00015675
C10E2.6	0	0	2	3	1	11	8	23	18	24	2	0	0	3	6	15	19	10	21	7	WBGene00015676
C10F3.1	0	15	35	57	99	81	11	15	19	57	4	18	35	48	94	45	25	18	30	7	WBGene00015677
C10F3.2	0	0	0	0	0	0	0	0	0	0	0	0	0	0	0	0	0	0	0	0	WBGene00000979
C10F3.3	0	0	0	0	0	0	0	0	0	0	0	0	0	0	0	0	0	0	0	0	WBGene00000069
C10F3.4	0	0	0	0	0	2	0	0	0	0	0	0	0	0	0	1	0	0	1	0	WBGene00015678
C10F3.5	1	0	1	0	0	5	1	1	1	6	0	0	0	0	3	5	3	1	3	0	WBGene00003954
C10F3.6	0	0	0	0	0	0	0	0	0	0	0	0	0	0	0	0	0	0	0	0	WBGene00001508
C10F3.7	0	0	0	0	0	0	0	0	0	0	0	0	0	0	0	0	0	0	0	0	WBGene00015679
C10G11.1	0	0	0	0	0	0	0	0	0	0	0	0	0	0	0	0	0	0	0	0	WBGene00015685
C10G11.10	0	0	0	0	0	0	0	0	0	0	0	0	0	0	0	0	0	0	0	0	WBGene00015690
C10G11.2	0	0	0	0	0	0	0	0	0	0	0	0	0	0	0	0	0	0	0	0	WBGene00005273
C10G11.3	0	0	0	0	0	0	0	0	0	0	0	0	0	0	0	0	0	0	0	0	WBGene00005274
C10G11.4	0	0	0	0	0	0	0	0	0	0	0	0	0	0	0	0	0	0	0	0	WBGene00005272
C10G11.5	9	24	41	45	77	46	3	9	18	35	5	14	24	36	41	19	7	9	10	7	WBGene00004068
C10G11.6	0	0	0	0	0	1	0	0	0	0	0	0	0	0	0	0	0	0	0	0	WBGene00015686
C10G11.7	21	42	98	103	185	165	23	40	56	127	17	31	60	77	149	74	51	36	57	30	WBGene00015687
C10G11.8	0	0	0	0	0	0	0	0	0	0	0	0	0	0	0	0	0	0	0	0	WBGene00015688
C10G11.9	0	0	0	0	0	0	0	0	0	0	0	0	0	0	0	0	0	0	0	0	WBGene00015689
C10G6.1	0	0	1	0	1	1	1	2	2	6	0	0	0	0	0	2	1	3	1	0	WBGene00015680
C10G8.1	0	0	0	0	0	0	0	0	0	0	0	0	0	0	0	0	0	0	0	0	WBGene00005183
C10G8.2	0	0	0	0	0	0	0	0	0	0	0	0	0	0	0	0	0	0	0	0	WBGene00015681
C10G8.3	0	0	0	0	0	0	0	0	0	0	0	0	0	0	0	0	0	0	0	0	WBGene00015682
C10G8.4	0	0	2	0	0	0	0	0	0	0	0	0	0	0	0	0	0	0	0	0	WBGene00015683
C10G8.5	0	0	1	1	0	0	0	0	0	0	1	0	0	0	1	1	0	0	0	0	WBGene00003567
C10G8.6	0	0	0	0	0	0	0	0	0	0	0	0	0	0	0	0	0	0	0	0	WBGene00000455
C10G8.7	0	0	0	0	0	0	0	0	0	0	0	0	0	0	0	0	0	0	0	0	WBGene00000454
C10G8.8	2	0	0	0	0	4	0	5	2	1	0	1	0	0	0	5	1	2	2	4	WBGene00015684
C10H11.1	3	10	15	21	22	17	3	7	8	15	2	5	7	7	43	38	12	9	14	5	WBGene00015691
C10H11.10	22	53	130	292	394	317	40	37	61	81	14	46	146	182	322	170	46	49	48	21	WBGene00015698
C10H11.3	0	0	0	0	0	0	0	0	0	0	0	0	0	0	0	0	0	0	0	0	WBGene00015692
C10H11.4	1	0	0	0	0	7	4	0	1	4	0	0	0	0	5	4	3	0	1	0	WBGene00015693
C10H11.5	0	0	0	0	0	0	0	0	0	0	0	0	0	0	0	0	0	0	0	0	WBGene00015694
C10H11.6	0	0	0	1	0	0	0	1	0	0	0	0	0	0	0	0	0	0	0	0	WBGene00015695
C10H11.7	0	0	0	0	0	0	0	0	0	0	0	0	0	0	0	0	0	0	0	0	WBGene00015696
C10H11.8	0	0	0	0	2	0	0	0	0	0	1	0	0	0	1	0	0	0	0	0	WBGene00015697
C10H11.9	14	70	74	90	124	67	17	18	17	41	11	23	52	87	100	38	23	25	30	12	WBGene00002694
C11D2.1	0	0	0	0	0	0	0	0	0	0	0	0	0	0	0	0	0	0	0	0	WBGene00015699
C11D2.2	0	0	0	0	0	0	0	0	0	0	0	0	0	0	0	0	0	0	0	0	WBGene00015700
C11D2.3	1	0	1	0	1	0	0	1	1	0	0	0	0	0	2	0	0	0	0	0	WBGene00015701
C11D2.4	10	21	58	68	71	58	9	10	15	47	8	15	22	39	66	27	16	6	13	11	WBGene00015702
C11D2.6	0	0	0	0	0	0	0	0	0	0	0	0	0	0	0	0	0	0	0	0	WBGene00006809
C11D2.7	9	35	39	50	46	26	2	3	4	21	5	19	18	47	42	22	9	3	4	3	WBGene00015703
C11D9.1	0	0	0	0	0	5	0	0	0	0	0	0	0	0	0	0	2	0	1	0	WBGene00015704
C11E4.1	0	0	0	0	0	0	0	0	0	0	0	0	0	0	0	0	0	0	0	0	WBGene00007516
C11E4.2	0	0	0	0	0	0	0	0	0	0	0	0	0	0	0	0	0	0	0	0	WBGene00007517
C11E4.3	0	0	0	0	0	0	0	0	0	0	0	0	0	0	0	0	0	0	0	0	WBGene00007518
C11E4.6	0	0	0	0	0	0	1	0	0	1	0	0	0	0	0	3	1	0	0	1	WBGene00007520
C11E4.7	0	0	0	0	0	0	0	0	0	0	0	0	0	0	0	0	0	0	0	0	WBGene00007521
C11E4.8	0	0	0	0	0	0	0	0	0	0	0	0	0	0	0	0	0	0	0	0	WBGene00007522
C11G10.1	0	0	0	0	0	0	0	0	0	0	0	0	0	0	0	0	0	0	0	0	WBGene00007525
C11G10.2	0	0	0	0	0	0	0	0	0	0	0	0	0	0	0	0	0	0	0	0	WBGene00007526
C11G6.1	0	0	2	0	0	11	1	5	5	15	1	1	0	2	14	18	8	7	9	6	WBGene00006384
C11G6.2	0	0	0	0	0	0	0	0	0	0	0	0	0	0	0	0	0	0	0	0	WBGene00007523
C11G6.4	0	0	0	0	0	0	1	0	0	1	0	0	0	0	0	0	0	0	1	0	WBGene00003624
C11H1.2	0	0	0	0	0	5	2	2	2	3	0	0	0	0	1	1	0	0	0	1	WBGene00007528
C11H1.3	0	0	0	0	1	4	2	4	0	15	0	0	0	0	2	5	4	5	5	0	WBGene00007529
C11H1.4	0	0	0	0	0	0	0	0	0	1	0	0	0	0	0	0	0	0	0	0	WBGene00004191
C11H1.5	0	0	0	0	0	0	0	0	0	0	0	0	0	0	0	0	0	0	0	0	WBGene00007530
C11H1.7	0	1	0	0	0	0	0	0	0	0	0	0	0	0	0	2	1	0	0	0	WBGene00007531
C11H1.8	0	0	0	0	0	4	2	0	0	0	0	0	0	0	2	2	0	0	0	0	WBGene00007532
C11H1.9	0	0	0	0	0	0	0	0	0	2	0	0	0	0	0	0	0	0	0	2	WBGene00023500
C12C8.1	0	0	0	0	0	0	0	0	0	1	0	0	0	1	0	2	1	0	0	0	WBGene00002026
C12C8.2	0	0	0	0	0	0	0	0	0	0	0	0	0	0	0	0	0	0	0	0	WBGene00007533
C12C8.3	0	0	1	0	6	2	0	0	1	0	0	0	0	1	2	0	0	0	0	0	WBGene00003026
C12D12.1	0	0	0	0	0	0	1	0	0	0	0	0	0	0	0	0	0	0	0	0	WBGene00015713
C12D12.2	0	0	0	2	4	1	1	0	0	1	0	0	0	0	0	0	0	0	0	0	WBGene00001620
C12D12.3	0	0	0	0	0	0	0	0	0	0	0	0	0	0	0	0	0	0	0	0	WBGene00015714
C12D12.4	0	0	0	0	0	0	0	0	0	0	0	0	0	0	0	0	0	0	0	0	WBGene00015715
C12D12.5	0	0	0	0	0	0	1	0	0	0	0	0	0	0	0	0	1	0	0	0	WBGene00015716
C12D5.10	0	0	0	0	0	0	0	0	0	0	0	0	0	0	0	0	0	0	0	0	WBGene00015711
C12D5.11	0	0	0	0	0	0	0	0	0	0	0	0	0	0	0	0	0	0	0	0	WBGene00015712
C12D5.2	0	0	0	0	0	0	0	0	0	0	0	0	0	0	0	0	0	0	0	0	WBGene00015705
C12D5.3	0	0	0	0	0	0	0	0	0	0	0	0	0	0	0	0	0	0	0	0	WBGene00015706
C12D5.4	0	0	0	0	0	0	0	0	0	0	0	0	0	0	0	0	0	0	0	0	WBGene00015707
C12D5.5	0	0	0	0	0	0	0	0	0	0	0	0	0	0	0	0	0	0	0	0	WBGene00015708
C12D5.7	0	0	0	0	0	0	0	0	0	0	0	0	0	0	0	1	0	0	0	0	WBGene00015709
C12D5.8	0	0	0	0	0	0	0	0	0	0	0	0	0	0	0	0	0	0	0	0	WBGene00003684
C12D5.9	0	0	0	0	0	0	0	0	0	0	0	0	0	0	0	0	0	0	0	0	WBGene00015710
C12D8.1	12	40	50	77	128	106	13	12	26	51	10	21	47	63	99	59	27	11	16	14	WBGene00007534
C12D8.10	9	41	105	186	268	207	25	53	61	147	18	56	83	88	179	101	59	50	46	38	WBGene00000102
C12D8.11	5	32	34	57	48	24	8	7	16	22	4	19	18	41	36	10	9	7	11	2	WBGene00004405
C12D8.12	0	0	0	0	0	0	0	0	0	0	0	0	0	0	0	0	0	0	0	0	WBGene00006226
C12D8.13	0	0	0	0	0	0	0	0	0	0	0	0	0	0	0	0	0	0	0	0	WBGene00007540
C12D8.14	0	0	0	0	0	0	0	0	0	0	0	0	0	0	0	0	0	0	0	0	WBGene00007541
C12D8.15	0	0	0	0	0	0	0	0	0	0	0	0	0	0	0	0	0	0	0	0	WBGene00007542
C12D8.16	0	0	0	0	0	0	0	0	0	0	0	0	0	0	0	0	0	0	0	0	WBGene00007543
C12D8.17	0	0	0	0	0	0	0	0	0	0	0	0	0	0	0	0	0	0	0	0	WBGene00007544
C12D8.18	0	0	0	0	0	0	0	0	0	0	0	0	1	0	0	0	0	0	0	0	WBGene00044174
C12D8.19	0	0	0	0	0	0	0	0	0	0	0	0	0	0	0	0	0	0	0	0	WBGene00044175
C12D8.20	0	0	0	0	0	0	0	0	0	0	0	0	0	0	0	0	0	0	0	0	WBGene00194780
C12D8.21	0	0	0	0	0	0	0	0	0	0	0	0	0	0	0	0	0	0	0	0	WBGene00195157
C12D8.4	0	0	0	0	0	0	0	0	0	0	0	0	0	0	0	0	0	0	0	0	WBGene00007535
C12D8.5	0	0	0	0	0	0	0	0	0	0	0	0	0	0	0	0	0	0	0	0	WBGene00007536
C12D8.6	0	0	0	0	0	0	0	0	0	0	0	0	0	0	0	0	0	0	0	0	WBGene00007537
C12D8.8	0	0	0	0	0	0	0	0	0	0	0	0	0	0	0	0	0	0	0	0	WBGene00000721
C12D8.9	0	0	0	0	0	0	0	0	0	0	0	0	0	0	0	0	0	0	0	0	WBGene00007538
C13A10.1	0	0	0	0	0	1	0	0	0	0	0	0	0	0	0	1	0	0	0	0	WBGene00015728
C13A10.2	0	0	0	0	0	0	0	0	1	0	0	0	0	0	0	1	0	0	0	0	WBGene00015729
C13A2.1	0	0	0	0	0	0	0	0	0	0	0	0	0	0	0	0	0	0	0	0	WBGene00015718
C13A2.10	0	0	0	0	0	0	0	0	0	0	0	0	0	0	0	0	0	0	0	0	WBGene00015726
C13A2.11	0	0	0	0	0	0	0	0	0	0	0	0	0	0	0	0	0	0	0	0	WBGene00015727
C13A2.12	0	0	0	0	0	0	0	0	0	0	0	0	0	0	0	0	0	0	0	0	WBGene00044547
C13A2.2	0	0	0	0	0	0	0	0	0	0	0	0	0	0	0	0	0	0	0	0	WBGene00015719
C13A2.3	0	0	0	0	0	0	0	0	0	0	0	0	0	0	0	0	0	0	0	0	WBGene00015720
C13A2.4	0	0	0	0	0	0	0	0	0	0	0	0	0	0	0	0	0	0	0	0	WBGene00015721
C13A2.5	0	0	0	0	0	0	0	0	0	0	0	0	0	0	0	0	0	0	0	0	WBGene00015722
C13A2.6	0	0	0	0	0	0	0	0	0	0	0	0	0	0	0	0	0	0	0	0	WBGene00015723
C13A2.7	0	0	0	0	0	0	0	0	0	0	0	0	0	0	0	0	0	0	0	0	WBGene00015724
C13A2.9	0	0	0	0	0	0	0	0	0	0	0	0	0	0	0	0	0	0	0	0	WBGene00015725
C13B4.1	1	7	32	29	57	48	4	4	10	31	6	7	21	23	42	27	9	5	10	3	WBGene00007545
C13B4.2	25	71	91	171	217	174	30	27	51	93	35	25	76	104	174	79	42	32	49	47	WBGene00006856
C13B7.1	0	0	0	0	0	0	0	0	0	0	0	0	0	0	0	0	0	0	0	0	WBGene00015730
C13B7.2	0	0	0	0	0	0	0	0	0	0	0	0	0	0	0	0	0	0	0	0	WBGene00006171
C13B7.3	0	0	0	0	0	0	0	0	0	0	0	0	0	0	0	0	0	0	0	0	WBGene00005137
C13B7.4	0	0	0	0	1	0	0	0	0	0	0	0	0	0	0	0	0	0	0	0	WBGene00005148
C13B7.5	0	0	0	0	0	0	0	0	0	0	0	0	0	0	0	0	0	0	0	0	WBGene00006170
C13B7.6	0	1	1	0	0	0	0	0	0	0	1	0	1	1	0	1	0	0	0	0	WBGene00015731
C13B9.2	0	0	4	4	15	6	0	3	0	0	0	0	4	2	6	3	2	0	0	0	WBGene00015733
C13B9.3	8	23	28	28	52	47	4	13	11	28	7	11	23	48	47	21	8	4	13	10	WBGene00015734
C13B9.4	0	2	2	2	4	4	0	2	0	0	1	0	0	1	4	1	0	0	1	0	WBGene00015735
C13C12.1	0	0	0	0	1	0	0	0	0	0	0	0	0	0	0	1	0	0	2	0	WBGene00000285
C13C12.2	0	0	0	0	0	0	0	0	0	0	0	0	0	0	0	0	0	0	0	0	WBGene00007552
C13C4.1	0	0	0	0	0	0	0	0	0	0	0	0	0	0	0	0	0	0	0	0	WBGene00007546
C13C4.2	0	0	0	0	0	2	0	0	0	4	0	0	0	0	0	3	3	1	3	0	WBGene00007547
C13C4.3	0	0	0	0	0	0	0	1	0	0	0	0	0	0	0	0	0	0	0	0	WBGene00003726
C13C4.4	0	0	0	0	0	1	6	2	0	15	0	0	0	0	3	3	2	2	4	3	WBGene00007548
C13C4.5	0	0	1	0	0	0	0	0	0	0	0	0	0	0	0	0	0	0	0	0	WBGene00007549
C13C4.6	0	0	0	0	0	0	0	0	0	0	0	0	0	0	0	0	0	0	0	0	WBGene00007550
C13C4.7	0	0	0	0	0	0	0	0	0	0	0	0	0	0	0	0	0	0	0	0	WBGene00007551
C13C4.8	0	0	0	0	0	0	0	0	0	0	0	0	0	0	0	0	0	0	0	0	WBGene00195250
C13D9.1	0	0	0	0	0	0	0	0	0	0	0	0	0	0	0	0	0	0	0	0	WBGene00005657
C13D9.2	0	0	0	0	0	0	0	0	0	0	0	0	0	0	0	0	0	0	0	0	WBGene00005656
C13D9.3	0	0	0	0	0	0	0	0	0	0	0	0	0	0	0	0	0	0	0	0	WBGene00005659
C13D9.4	0	0	0	0	0	0	0	0	0	0	0	0	0	0	0	0	0	0	0	0	WBGene00015736
C13D9.5	0	0	0	0	0	0	0	0	0	0	0	0	0	0	0	0	0	0	0	0	WBGene00015737
C13D9.6	0	0	0	0	0	0	0	0	0	0	0	0	0	0	0	0	0	0	0	0	WBGene00015738
C13D9.7	0	0	0	0	0	1	0	0	0	2	0	0	0	0	1	1	0	0	0	1	WBGene00003573
C13D9.8	0	0	0	0	0	0	0	0	0	0	0	0	0	0	0	0	0	0	0	0	WBGene00003574
C13D9.9	0	0	0	0	0	0	0	0	0	0	0	0	0	0	0	0	0	0	0	0	WBGene00015739
C13E3.1	0	0	0	0	0	0	0	0	0	0	0	0	0	0	0	0	0	0	0	0	WBGene00015740
C13F10.1	0	0	0	0	0	0	0	0	2	0	0	0	0	1	0	2	0	0	0	1	WBGene00015741
C13F10.2	0	1	4	19	30	19	0	2	5	11	0	2	3	5	11	5	2	0	0	1	WBGene00015742
C13F10.4	5	28	66	73	88	65	16	22	24	58	6	15	43	49	74	47	27	26	28	21	WBGene00015743
C13F10.5	3	20	35	38	36	35	3	0	4	19	4	8	17	22	27	14	7	1	3	4	WBGene00015744
C13F10.6	8	25	30	36	53	51	6	10	14	19	2	12	17	16	31	14	7	7	6	2	WBGene00015745
C13F10.7	5	26	64	88	106	63	16	22	32	46	5	11	24	47	41	39	30	23	21	20	WBGene00015746
C13G3.1	0	0	0	3	0	0	0	0	1	0	0	0	0	1	1	1	1	1	3	4	WBGene00007553
C13G3.2	0	0	0	0	0	0	0	0	0	0	0	0	0	0	0	0	0	0	0	0	WBGene00001991
C13G3.3	16	50	120	213	280	209	16	29	36	109	21	54	90	125	174	102	47	54	39	33	WBGene00007554
C13G5.1	0	0	0	0	0	0	0	0	0	0	0	0	0	0	0	0	0	0	0	0	WBGene00000439
C13G5.2	7	28	42	54	81	47	4	5	13	40	13	15	29	23	33	22	10	3	7	3	WBGene00015747
C14A11.2	0	0	0	0	0	0	0	0	0	0	0	0	0	0	0	0	0	0	0	0	WBGene00015748
C14A11.3	0	0	1	0	1	8	1	0	4	21	0	0	0	1	2	11	10	5	4	4	WBGene00006496
C14A11.5	0	0	0	0	0	0	0	0	0	0	0	0	0	0	0	0	0	0	0	0	WBGene00015750
C14A11.6	0	0	0	0	0	0	0	0	0	0	0	0	0	0	0	0	0	0	0	0	WBGene00015751
C14A11.7	0	0	0	0	0	0	1	0	0	0	0	0	0	0	0	0	0	0	0	0	WBGene00006055
C14A11.9	0	0	0	0	3	32	8	6	12	25	0	0	0	0	5	21	15	7	5	4	WBGene00050944
C14A4.1	15	62	65	68	67	20	3	4	6	13	16	24	56	79	50	5	3	1	1	1	WBGene00007555
C14A4.10	9	36	52	67	52	51	2	3	11	38	11	16	27	61	41	22	6	11	19	11	WBGene00006397
C14A4.11	7	18	24	53	40	29	8	6	16	35	4	5	7	24	32	26	8	3	10	5	WBGene00007561
C14A4.12	0	0	0	0	0	0	0	0	1	0	0	0	0	0	0	0	0	0	0	0	WBGene00007562
C14A4.13	0	0	0	0	0	0	0	0	0	0	0	0	0	0	0	0	0	0	0	0	WBGene00007563
C14A4.14	27	66	77	60	96	48	7	7	9	43	14	40	49	81	80	33	21	11	11	10	WBGene00007564
C14A4.15	0	0	0	0	0	0	0	0	0	0	0	0	0	0	0	0	0	0	0	0	WBGene00005713
C14A4.2	6	37	32	32	47	19	1	1	6	13	8	11	17	30	25	12	2	1	2	1	WBGene00000933
C14A4.3	4	14	24	32	31	34	5	5	18	20	1	13	19	23	42	20	9	10	12	7	WBGene00007556
C14A4.4	15	56	75	92	110	69	16	6	25	54	19	40	48	86	98	40	17	16	26	9	WBGene00000796
C14A4.5	10	12	19	25	17	18	8	0	3	12	5	10	14	23	32	10	8	2	7	2	WBGene00000798
C14A4.6	0	0	0	0	0	0	0	0	0	0	0	0	0	0	0	0	0	0	0	0	WBGene00007557
C14A4.7	0	0	0	0	0	0	0	0	0	0	0	0	0	0	0	0	0	0	0	0	WBGene00007558
C14A4.8	0	0	0	0	0	0	0	0	0	0	0	0	0	0	0	0	0	0	0	0	WBGene00007559
C14A4.9	0	0	0	0	0	0	0	0	0	0	0	0	0	0	0	0	0	0	0	0	WBGene00007560
C14A6.1	0	0	0	0	0	0	0	0	0	0	0	0	0	0	0	0	0	0	0	0	WBGene00007565
C14A6.12	0	0	0	0	0	0	0	0	0	0	0	0	0	0	0	0	0	0	0	0	WBGene00050955
C14A6.13	0	0	0	0	0	0	0	0	0	0	0	0	0	0	0	0	0	0	0	0	WBGene00050956
C14A6.16	0	0	0	0	0	0	0	0	0	0	0	0	0	0	0	0	0	0	0	0	WBGene00206536
C14A6.2	0	0	0	0	0	0	0	0	0	0	0	0	0	0	0	0	0	0	0	0	WBGene00007566
C14A6.3	0	0	0	0	0	0	0	0	0	0	0	0	0	0	0	0	0	0	0	0	WBGene00007567
C14A6.5	0	0	0	0	0	0	0	0	0	0	0	0	0	0	0	0	0	0	0	0	WBGene00007569
C14A6.6	0	0	0	0	0	0	0	0	0	0	0	0	0	0	0	0	0	0	0	0	WBGene00007570
C14A6.7	0	0	0	0	0	0	0	0	0	0	0	0	0	0	0	0	0	0	0	0	WBGene00007571
C14A6.8	0	0	0	0	0	0	0	0	0	0	0	0	0	0	0	0	0	0	0	0	WBGene00007572
C14B1.1	33	106	133	203	237	216	18	34	84	168	45	76	125	122	146	112	86	72	112	36	WBGene00003962
C14B1.10	1	4	12	4	6	6	0	0	1	2	3	0	8	9	5	0	1	1	3	0	WBGene00007581
C14B1.12	4	21	43	53	68	39	6	3	5	17	8	15	33	50	40	25	7	2	5	3	WBGene00184990
C14B1.2	3	34	105	149	193	152	21	31	60	99	8	35	85	79	118	56	72	52	74	31	WBGene00007573
C14B1.3	0	1	1	1	6	9	0	0	1	1	0	0	0	2	2	1	3	0	2	0	WBGene00007574
C14B1.4	3	21	45	50	54	54	6	11	20	69	5	16	26	40	52	42	25	8	16	10	WBGene00006474
C14B1.5	8	11	22	15	20	17	0	0	8	19	5	8	22	21	17	5	3	2	5	0	WBGene00007576
C14B1.6	1	12	17	15	17	24	1	4	2	7	1	7	6	11	23	7	5	4	5	3	WBGene00007577
C14B1.7	3	30	56	63	43	14	0	2	2	4	11	21	44	43	31	9	1	2	1	2	WBGene00007578
C14B1.8	1	5	13	23	22	7	1	2	5	10	1	5	13	11	14	11	5	3	1	1	WBGene00007579
C14B1.9	5	31	58	89	155	99	13	18	26	69	6	24	44	40	67	49	31	26	31	23	WBGene00007580
C14B4.2	0	0	0	0	0	0	0	0	0	2	0	0	0	0	0	1	0	0	1	0	WBGene00007583
C14B9.1	0	0	1	4	2	5	4	4	5	7	0	0	3	0	3	3	6	0	2	5	WBGene00002011
C14B9.10	17	53	79	55	67	50	7	6	8	32	23	20	56	70	40	21	7	6	9	7	WBGene00015755
C14B9.2	1	4	8	7	5	4	2	0	1	4	0	0	0	2	0	2	1	1	0	2	WBGene00015752
C14B9.3	0	0	0	0	0	0	0	0	0	0	0	0	0	0	0	0	0	0	0	0	WBGene00015753
C14B9.4	32	83	156	221	327	214	21	31	66	105	32	40	105	142	208	100	55	45	58	35	WBGene00004042
C14B9.6	0	0	0	0	0	14	0	1	1	5	0	0	0	0	8	7	6	2	1	3	WBGene00001565
C14B9.7	300	733	818	746	809	645	94	37	54	37	429	400	669	876	709	422	100	18	21	8	WBGene00004433
C14B9.8	1	10	11	24	27	20	3	5	6	17	4	6	6	18	22	10	5	8	10	2	WBGene00015754
C14C10.1	0	0	0	0	0	0	0	0	0	0	0	0	0	0	0	0	0	0	0	0	WBGene00007584
C14C10.2	0	5	7	6	5	6	1	0	0	2	1	3	4	2	6	3	1	0	0	0	WBGene00007585
C14C10.3	18	57	57	85	92	97	8	7	18	35	14	33	37	81	87	23	24	12	14	11	WBGene00007586
C14C10.4	9	20	24	37	43	18	4	3	3	21	3	13	16	33	32	19	11	6	10	3	WBGene00007587
C14C10.5	36	102	163	242	259	182	21	54	68	110	41	72	91	186	235	113	60	61	81	44	WBGene00007588
C14C10.6	1	2	6	6	7	6	1	2	4	9	0	1	1	2	1	4	0	1	1	1	WBGene00007589
C14C10.7	0	0	0	0	1	0	0	0	0	0	0	0	0	0	0	0	0	0	0	0	WBGene00007590
C14C11.1	0	0	0	1	2	0	0	0	1	0	0	0	0	0	1	0	0	0	0	0	WBGene00015765
C14C11.2	1	10	18	36	66	38	5	4	6	34	6	4	18	19	34	8	6	4	7	4	WBGene00015766
C14C11.3	0	0	1	0	0	1	0	0	1	0	0	0	0	0	0	0	0	0	0	2	WBGene00015767
C14C11.4	0	0	0	0	0	0	0	0	0	0	0	0	0	0	0	0	0	0	0	0	WBGene00015768
C14C11.5	0	0	0	0	0	0	0	0	0	0	0	0	0	0	0	0	0	0	0	0	WBGene00006008
C14C11.6	3	17	26	26	30	22	2	5	5	11	9	7	23	24	34	7	4	2	3	1	WBGene00003507
C14C11.7	11	67	98	122	149	98	16	16	52	112	5	17	43	40	42	36	22	16	25	17	WBGene00015769
C14C11.8	0	1	0	0	0	0	0	0	0	0	0	0	0	1	0	0	0	0	0	0	WBGene00004104
C14C6.1	0	0	0	0	0	0	0	0	0	0	0	0	0	0	0	0	0	0	0	0	WBGene00005898
C14C6.10	0	0	0	0	0	0	0	0	0	0	0	0	0	0	0	0	0	0	0	0	WBGene00005585
C14C6.12	0	0	0	0	0	0	0	0	0	0	0	0	0	0	0	0	0	0	0	0	WBGene00015763
C14C6.13	0	0	0	0	0	0	0	0	0	0	0	0	0	0	0	0	0	0	0	0	WBGene00015764
C14C6.2	0	0	0	0	0	0	0	0	0	0	0	0	0	0	0	0	0	0	0	0	WBGene00015756
C14C6.3	0	0	0	0	0	0	0	0	0	0	0	0	0	0	0	0	0	0	0	0	WBGene00015757
C14C6.4	0	0	0	0	0	0	0	0	0	0	0	0	0	0	0	0	0	0	0	0	WBGene00015758
C14C6.5	0	0	0	0	0	0	0	0	0	0	0	0	0	0	2	1	0	0	0	0	WBGene00015759
C14C6.6	0	0	0	0	0	0	0	0	0	0	0	0	0	0	0	0	0	0	0	0	WBGene00015760
C14C6.7	0	0	0	0	0	0	0	0	0	0	0	0	0	0	0	0	0	0	0	0	WBGene00015761
C14C6.8	0	0	0	0	0	0	0	0	0	0	0	0	0	0	0	0	0	0	0	0	WBGene00015762
C14C6.9	0	0	0	0	0	0	0	0	0	0	0	0	0	0	0	0	0	0	0	0	WBGene00005899
C14E2.1	0	0	0	0	0	0	0	0	0	0	0	0	0	0	0	0	0	0	0	0	WBGene00015770
C14E2.11	0	0	0	0	0	0	0	0	0	0	0	0	0	0	0	0	0	0	0	0	WBGene00206378
C14E2.2	0	0	0	0	0	0	0	0	0	0	0	0	0	0	0	0	0	0	0	0	WBGene00015771
C14E2.3	0	0	0	0	0	0	0	0	0	0	0	0	0	0	0	0	0	0	0	0	WBGene00015772
C14E2.4	0	0	0	0	0	0	0	0	0	0	0	0	0	0	0	0	0	0	0	0	WBGene00015773
C14E2.5	0	0	0	0	0	0	0	0	0	0	0	0	0	0	0	0	0	0	0	0	WBGene00015774
C14E2.6	0	0	0	0	0	0	0	0	0	0	0	0	0	0	0	0	0	0	0	0	WBGene00015775
C14E2.7	0	0	0	0	0	0	0	0	0	0	0	0	0	0	0	0	0	0	0	0	WBGene00044562
C14F11.1	0	3	6	5	27	167	26	34	60	112	0	2	0	5	71	62	38	41	62	44	WBGene00015778
C14F11.2	0	0	1	0	1	1	1	0	4	5	0	0	1	3	1	2	1	1	0	1	WBGene00015779
C14F11.3	0	0	0	0	1	1	0	0	0	0	0	0	0	0	0	0	0	0	0	0	WBGene00001803
C14F11.4	0	0	0	1	1	0	0	0	1	2	0	0	0	1	1	0	0	0	1	1	WBGene00015780
C14F11.5	0	0	0	0	0	0	0	0	0	0	0	0	1	0	0	0	0	0	0	0	WBGene00002024
C14F11.6	0	0	1	0	0	1	0	0	0	0	0	0	0	0	0	0	0	0	0	0	WBGene00015781
C14F11.7	0	0	0	0	0	0	0	0	0	0	0	0	0	0	0	0	0	0	0	0	WBGene00015782
C14F5.1	0	0	2	0	0	4	3	5	5	17	1	0	0	1	1	7	2	3	6	7	WBGene00015776
C14F5.2	0	0	0	0	0	0	0	0	0	0	0	0	0	0	0	0	0	0	0	0	WBGene00006980
C14F5.3	0	0	0	1	3	0	0	1	0	2	0	0	1	0	0	2	0	0	0	0	WBGene00006588
C14F5.4	0	0	0	0	0	3	0	2	5	5	0	0	0	0	3	3	0	2	2	2	WBGene00015777
C14F5.5	0	0	2	2	1	15	4	2	11	20	0	0	0	1	7	5	7	0	8	1	WBGene00004774
C14H10.1	0	0	0	1	0	0	0	1	0	2	0	0	0	2	0	0	0	1	1	0	WBGene00007591
C14H10.2	0	1	2	1	1	1	0	1	0	6	0	1	0	1	0	0	1	3	0	1	WBGene00007592
C14H10.3	0	0	0	0	0	0	0	0	1	0	0	0	0	1	0	0	0	0	0	0	WBGene00007593
C14H10.4	0	0	0	0	0	0	0	0	0	0	0	0	0	0	0	0	0	0	0	0	WBGene00006135
C15A11.1	0	0	0	0	0	0	0	0	0	0	0	0	0	0	0	0	0	0	0	0	WBGene00000612
C15A11.2	0	0	0	0	0	0	0	0	0	0	0	0	0	0	0	0	0	0	0	0	WBGene00007597
C15A11.3	0	0	0	0	0	1	0	0	0	0	0	0	0	0	0	0	0	0	0	0	WBGene00004944
C15A11.4	0	0	0	0	0	0	0	0	0	0	0	0	0	0	0	0	0	0	0	0	WBGene00007598
C15A11.5	0	0	0	0	0	0	0	0	0	0	0	0	0	0	0	0	0	0	0	0	WBGene00000596
C15A11.6	0	0	0	0	0	0	0	0	0	0	0	0	0	0	0	0	0	0	0	0	WBGene00000638
C15A11.7	0	0	0	0	0	0	0	0	0	0	0	0	0	0	0	0	0	0	0	0	WBGene00007599
C15A7.1	0	0	0	0	0	0	0	0	0	0	0	0	0	0	0	0	0	0	0	0	WBGene00007594
C15A7.2	0	0	0	0	0	0	0	0	0	0	0	0	0	0	0	0	0	0	0	0	WBGene00007595
C15A7.4	0	0	0	0	0	0	0	0	0	0	0	0	0	0	0	0	0	0	0	0	WBGene00045385
C15B12.1	0	0	0	0	0	0	0	0	0	0	0	0	0	0	0	0	0	0	0	0	WBGene00015783
C15B12.2	0	0	0	0	0	0	0	0	0	0	0	0	0	0	0	0	0	0	0	0	WBGene00015784
C15B12.3	0	0	0	0	0	0	0	0	0	0	0	0	0	0	0	0	0	0	0	0	WBGene00015785
C15B12.4	0	0	0	0	0	0	0	0	0	0	0	0	0	0	0	0	0	0	0	0	WBGene00015786
C15B12.5	0	0	0	0	0	0	0	0	0	0	0	0	0	0	1	0	0	0	0	2	WBGene00001517
C15B12.6	0	0	0	0	0	1	0	0	0	0	0	0	0	0	0	0	0	0	0	0	WBGene00015787
C15B12.7	0	0	1	0	0	8	3	0	2	12	0	0	0	0	0	15	5	1	3	2	WBGene00000393
C15B12.8	0	0	0	0	0	0	0	0	0	0	0	0	0	0	0	0	0	0	0	0	WBGene00015788
C15B12.9	0	0	0	0	0	0	0	0	0	0	0	0	0	0	0	0	0	0	0	0	WBGene00044573
C15C6.1	0	0	0	0	0	2	0	0	0	0	0	0	0	0	0	1	1	0	0	0	WBGene00007600
C15C6.2	0	1	0	0	0	1	0	0	0	0	0	0	1	0	0	0	0	0	0	0	WBGene00007601
C15C6.3	0	0	6	2	2	2	0	0	0	0	0	1	1	2	2	4	1	0	1	0	WBGene00007602
C15C6.4	3	25	21	39	47	29	5	8	10	35	5	13	8	37	23	17	12	1	5	4	WBGene00007603
C15C7.1	0	0	1	0	0	3	0	2	2	5	0	0	0	0	1	3	2	0	1	3	WBGene00015789
C15C7.2	0	0	0	0	0	7	4	3	6	0	0	0	0	2	6	9	1	0	4	0	WBGene00002220
C15C7.4	0	0	0	0	0	0	0	0	0	0	0	0	0	0	0	0	0	0	0	0	WBGene00015790
C15C7.5	1	0	1	0	0	4	0	3	2	3	0	0	0	2	1	13	5	0	7	1	WBGene00015791
C15C7.6	0	0	1	0	0	0	0	0	0	0	0	0	0	1	0	0	0	0	0	0	WBGene00015792
C15C7.7	0	0	0	1	0	2	2	1	3	1	0	0	0	1	3	2	3	4	2	0	WBGene00015793
C15C8.1	0	0	0	0	0	0	0	0	0	0	0	0	0	0	0	0	0	0	0	0	WBGene00007604
C15C8.2	0	0	0	0	0	0	0	0	0	0	0	0	0	0	0	0	0	0	0	0	WBGene00000521
C15C8.3	2	0	1	0	0	0	1	0	0	0	0	0	0	0	0	0	0	0	0	0	WBGene00007605
C15C8.4	1	10	10	28	31	29	5	1	5	20	2	10	19	8	32	15	8	7	4	7	WBGene00007606
C15C8.5	0	0	0	0	0	0	0	0	0	0	0	0	0	0	0	0	0	0	0	0	WBGene00007607
C15C8.6	0	0	0	0	0	0	0	0	0	0	0	0	0	0	0	0	0	0	0	0	WBGene00007608
C15C8.7	18	55	84	74	117	65	14	7	19	40	6	28	56	61	55	27	22	15	12	21	WBGene00007609
C15C8.8	0	0	0	0	0	0	0	0	0	0	0	0	0	0	0	0	0	0	0	0	WBGene00045460
C15F1.1	0	0	0	0	0	0	0	0	0	0	0	0	0	0	0	0	0	0	1	0	WBGene00015794
C15F1.2	0	0	0	0	0	0	0	0	1	2	0	0	0	0	0	0	1	0	0	0	WBGene00015795
C15F1.3	3	8	22	48	78	76	11	15	15	54	4	12	14	35	76	49	23	22	30	26	WBGene00006605
C15F1.4	9	25	19	34	55	23	3	7	6	15	5	12	16	31	27	8	11	10	12	3	WBGene00004090
C15F1.5	1	0	2	5	4	7	1	0	0	0	1	4	4	5	2	2	0	0	0	0	WBGene00015796
C15F1.6	6	46	72	58	83	60	10	11	19	65	13	31	65	36	57	51	20	18	20	18	WBGene00000198
C15F1.7	33	134	152	152	201	155	21	32	57	122	35	40	110	187	171	90	53	32	89	53	WBGene00004930
C15F1.8	2	4	10	7	8	5	0	0	1	2	0	4	6	9	3	4	0	0	0	0	WBGene00015797
C15H11.1	0	0	0	0	0	0	0	0	0	0	0	0	0	0	0	0	0	0	0	0	WBGene00007613
C15H11.10	0	0	0	0	0	0	0	0	0	0	0	0	0	0	0	0	0	0	0	0	WBGene00007618
C15H11.11	0	1	2	1	0	1	0	0	0	0	0	0	0	1	0	0	0	1	0	0	WBGene00007619
C15H11.13	0	0	0	0	0	0	0	0	0	0	0	0	0	0	0	0	0	0	0	0	WBGene00077576
C15H11.2	0	0	0	0	0	0	0	0	0	0	0	0	0	0	0	0	0	0	0	0	WBGene00007614
C15H11.3	1	0	1	4	0	0	0	0	0	1	1	0	0	0	0	0	0	0	0	0	WBGene00003834
C15H11.4	10	25	56	87	111	89	16	14	26	80	10	27	48	47	75	43	17	14	16	14	WBGene00000985
C15H11.5	8	29	48	32	25	32	4	4	6	24	9	13	29	23	49	18	1	5	2	3	WBGene00007615
C15H11.6	6	18	15	29	31	14	3	1	3	16	10	2	19	28	16	5	2	3	4	1	WBGene00003835
C15H11.7	51	152	123	161	245	164	12	29	43	128	47	45	90	263	215	90	50	35	52	32	WBGene00003922
C15H11.8	3	23	28	16	40	30	1	3	8	19	3	5	15	16	6	5	6	1	4	0	WBGene00007616
C15H11.9	26	83	95	93	102	71	11	8	15	27	42	59	67	62	69	31	16	14	16	4	WBGene00007617
C15H7.3	0	0	0	0	0	0	0	0	0	0	0	0	0	0	0	0	0	0	0	0	WBGene00007610
C15H7.4	0	0	0	0	0	0	0	0	0	0	0	0	0	0	0	0	0	0	0	0	WBGene00007611
C15H9.1	0	0	1	0	0	0	0	0	0	0	0	0	0	0	0	0	0	0	0	0	WBGene00003778
C15H9.11	0	0	0	0	0	0	0	0	0	0	0	0	0	0	0	0	0	0	0	0	WBGene00015805
C15H9.2	0	0	0	0	0	0	0	0	0	0	0	0	0	0	0	0	0	0	0	0	WBGene00015798
C15H9.3	0	0	0	0	0	0	0	0	0	0	0	0	0	0	0	0	0	0	0	0	WBGene00015799
C15H9.4	0	0	0	0	0	0	0	0	0	0	0	0	0	0	0	1	0	0	0	0	WBGene00015800
C15H9.5	0	0	0	0	0	5	2	2	0	3	0	0	0	1	1	2	0	0	2	2	WBGene00015801
C15H9.6	3	3	11	6	12	144	38	27	57	84	3	5	4	6	43	94	53	33	63	24	WBGene00002007
C15H9.7	0	0	1	1	0	0	0	0	0	0	0	0	0	0	0	0	0	0	0	0	WBGene00015802
C15H9.8	0	0	0	0	0	0	0	0	0	0	0	0	0	0	0	1	0	0	0	0	WBGene00004193
C15H9.9	0	9	16	41	47	55	22	49	73	85	6	3	9	51	25	39	47	40	102	55	WBGene00015803
C16A11.1	0	0	0	0	0	0	0	0	0	0	0	0	0	0	0	0	0	0	0	0	WBGene00001673
C16A11.10	4	19	15	15	31	23	7	1	4	11	4	7	11	14	23	13	10	0	4	4	WBGene00185089
C16A11.2	10	23	53	68	86	37	10	7	15	43	10	25	31	42	70	33	9	11	11	6	WBGene00015815
C16A11.3	4	21	26	27	31	9	1	0	1	1	6	14	12	28	12	2	3	0	0	0	WBGene00015816
C16A11.4	36	64	113	92	71	32	1	5	10	29	27	36	51	68	70	15	2	4	6	8	WBGene00015817
C16A11.5	2	10	15	11	16	10	1	0	1	0	2	7	11	6	6	4	0	0	0	0	WBGene00015818
C16A11.6	4	11	31	29	47	29	4	2	6	8	8	7	13	10	31	15	3	4	6	6	WBGene00015819
C16A11.7	0	0	0	0	0	0	0	0	0	0	0	0	0	0	0	0	0	0	0	0	WBGene00015820
C16A11.8	0	0	0	0	0	0	0	0	0	0	0	0	0	0	0	0	0	0	0	0	WBGene00015821
C16A11.9	2	1	3	7	5	2	0	0	0	1	3	1	2	0	4	0	0	0	0	0	WBGene00045297
C16A3.1	3	25	10	29	35	22	5	1	6	23	3	7	11	14	28	8	1	4	5	3	WBGene00015806
C16A3.10	8	13	21	14	16	14	1	1	4	6	3	7	9	19	16	6	3	0	5	3	WBGene00015814
C16A3.2	3	9	18	25	65	26	3	4	9	17	0	5	8	11	12	13	3	1	1	0	WBGene00015807
C16A3.3	26	81	73	65	68	38	10	6	15	32	26	20	39	58	55	29	14	5	11	9	WBGene00002850
C16A3.4	61	174	191	261	302	175	31	26	57	70	48	74	145	220	195	74	32	33	19	14	WBGene00015809
C16A3.5	12	62	68	57	81	45	5	4	8	42	17	23	45	59	61	19	21	11	15	6	WBGene00015810
C16A3.6	39	114	145	139	156	91	5	5	13	15	45	88	132	146	115	35	18	4	6	4	WBGene00015811
C16A3.7	20	57	92	184	173	160	18	34	63	105	22	56	96	125	172	53	59	24	49	37	WBGene00007048
C16A3.8	13	44	52	82	76	56	6	16	23	35	12	24	41	65	79	45	15	15	33	8	WBGene00015813
C16A3.9	296	708	743	679	740	560	74	46	50	37	346	410	603	812	605	326	92	6	12	7	WBGene00004482
C16B8.1	0	0	0	0	1	0	1	0	0	0	0	0	0	0	0	0	0	2	0	0	WBGene00003007
C16B8.2	0	0	0	0	0	0	0	0	0	0	0	0	0	0	0	0	0	0	0	0	WBGene00015822
C16B8.3	0	0	0	0	0	0	0	0	0	0	0	0	0	0	0	1	0	0	0	0	WBGene00015823
C16B8.4	0	1	0	1	1	0	0	0	4	1	0	0	0	1	0	0	0	2	0	0	WBGene00015824
C16C10.1	2	22	58	94	140	57	8	2	30	49	4	18	39	39	77	49	26	10	19	20	WBGene00007622
C16C10.10	1	6	7	15	11	17	0	2	3	7	2	4	8	10	5	11	3	0	8	6	WBGene00006448
C16C10.11	124	306	360	411	511	377	48	74	123	221	90	158	206	509	370	215	120	145	159	98	WBGene00007630
C16C10.12	0	0	0	0	0	0	0	0	0	0	0	0	0	0	0	0	0	0	0	0	WBGene00007631
C16C10.13	0	0	0	1	1	0	0	0	0	0	0	0	0	0	0	1	0	0	0	0	WBGene00007632
C16C10.2	12	35	68	67	76	63	4	10	17	35	16	30	41	44	41	16	12	5	9	4	WBGene00007623
C16C10.3	17	55	127	184	256	134	17	30	51	111	15	33	116	144	175	92	39	47	63	45	WBGene00007624
C16C10.4	11	43	63	73	74	41	9	9	12	58	5	19	28	45	46	18	14	4	7	10	WBGene00007625
C16C10.5	10	13	59	78	118	42	17	10	35	56	5	23	23	51	91	53	24	18	33	17	WBGene00007626
C16C10.6	8	31	42	59	74	38	5	10	2	33	8	21	31	67	64	33	13	8	15	14	WBGene00007627
C16C10.7	4	25	56	52	87	49	10	8	21	60	6	18	30	36	52	47	25	7	16	16	WBGene00004381
C16C10.8	3	14	26	13	11	9	4	0	6	6	4	9	13	22	10	2	1	1	0	1	WBGene00007628
C16C10.9	0	0	0	0	0	0	0	0	0	0	0	0	0	0	0	0	0	0	0	0	WBGene00007629
C16C2.1	0	0	0	0	1	0	0	0	0	0	0	0	0	0	0	1	0	1	0	0	WBGene00000430
C16C2.2	0	0	0	0	0	5	1	2	2	2	0	0	0	0	2	14	6	5	1	2	WBGene00001145
C16C2.3	0	11	25	34	47	31	2	5	6	16	5	16	24	32	38	15	6	10	15	4	WBGene00007620
C16C2.4	8	12	31	56	63	57	11	14	16	54	3	23	47	43	66	33	20	10	19	15	WBGene00007621
C16C4.1	0	0	0	0	0	0	0	0	0	0	0	0	0	0	0	0	0	0	0	0	WBGene00015825
C16C4.10	0	0	0	0	0	0	0	0	0	0	0	0	0	0	0	0	0	0	0	0	WBGene00015834
C16C4.11	0	0	0	0	0	0	0	0	0	0	0	0	0	0	0	0	0	0	0	0	WBGene00015835
C16C4.12	0	0	0	0	0	0	0	0	0	0	0	0	0	0	0	0	0	0	0	0	WBGene00015836
C16C4.13	0	0	0	0	0	0	0	0	0	0	0	0	0	0	0	0	0	0	0	0	WBGene00015837
C16C4.14	0	0	0	0	0	0	0	0	0	0	0	0	0	0	0	1	0	0	0	0	WBGene00015838
C16C4.15	0	0	0	0	0	0	0	0	0	0	0	0	0	0	0	0	0	0	0	0	WBGene00015839
C16C4.16	0	0	0	0	0	0	0	0	0	0	0	0	0	0	0	0	0	0	0	0	WBGene00015840
C16C4.17	0	0	0	0	0	0	0	0	0	0	0	0	0	0	0	0	0	0	0	0	WBGene00044359
C16C4.18	1	1	1	1	4	6	2	0	1	0	2	1	1	1	3	4	0	0	0	0	WBGene00194998
C16C4.3	0	0	0	0	0	0	0	0	0	0	0	0	0	0	0	0	0	0	0	0	WBGene00015827
C16C4.4	2	0	0	0	0	0	0	0	0	0	0	0	0	0	0	0	0	0	0	0	WBGene00015828
C16C4.5	0	0	0	0	0	2	0	0	0	0	0	0	0	0	0	0	0	0	0	0	WBGene00015829
C16C4.6	0	0	0	0	0	0	0	0	0	0	0	0	0	0	0	0	0	0	0	0	WBGene00015830
C16C4.8	0	0	0	0	0	0	0	0	0	0	0	0	0	0	0	0	0	0	0	0	WBGene00015832
C16C4.9	0	0	0	0	0	0	0	0	0	0	0	0	0	0	0	0	0	0	0	0	WBGene00015833
C16C8.10	0	0	0	0	0	0	0	0	0	0	0	0	0	0	0	0	0	0	0	0	WBGene00015848
C16C8.11	3	3	6	4	11	4	2	1	4	4	3	0	5	2	2	3	0	1	0	0	WBGene00015849
C16C8.12	1	13	20	27	36	19	1	1	4	13	2	5	16	18	25	8	4	4	3	1	WBGene00015850
C16C8.13	2	8	13	14	13	5	0	1	0	1	1	2	11	7	13	2	0	1	1	0	WBGene00015851
C16C8.14	0	3	5	7	11	9	3	0	1	2	2	1	6	7	4	1	0	0	3	3	WBGene00015852
C16C8.16	7	55	51	93	101	53	2	3	5	20	13	19	59	63	62	32	10	6	5	0	WBGene00015853
C16C8.17	0	0	0	0	0	0	0	0	0	0	0	0	0	0	0	0	0	0	0	0	WBGene00015854
C16C8.18	0	0	0	0	0	0	0	0	0	0	0	0	0	0	0	0	0	0	0	0	WBGene00015855
C16C8.19	0	0	0	0	0	0	0	0	0	0	0	0	0	0	0	0	0	0	0	0	WBGene00015856
C16C8.2	0	0	0	0	0	0	0	0	0	1	0	0	0	0	0	0	0	0	0	0	WBGene00015841
C16C8.20	0	1	2	2	8	7	1	0	0	0	1	1	4	2	5	1	0	1	0	0	WBGene00195070
C16C8.21	0	0	0	0	0	0	0	0	0	0	2	0	0	0	1	0	0	0	0	0	WBGene00195071
C16C8.22	0	1	0	0	0	0	0	0	0	0	0	1	0	0	0	0	0	0	0	0	WBGene00195072
C16C8.4	2	25	35	38	59	35	7	2	9	22	4	3	17	22	30	17	6	7	8	3	WBGene00015842
C16C8.5	2	19	19	11	12	16	3	2	0	12	0	4	13	11	21	5	1	2	2	4	WBGene00015843
C16C8.7	0	0	0	0	0	0	0	0	0	0	0	0	0	0	0	0	0	0	0	0	WBGene00015845
C16C8.8	0	0	0	0	0	0	0	0	0	0	0	0	0	0	0	0	0	0	0	0	WBGene00015846
C16C8.9	0	0	0	0	0	0	0	0	0	0	0	0	0	0	0	0	0	0	0	0	WBGene00015847
C16D2.1	0	0	0	0	0	0	0	0	0	0	0	0	0	0	0	1	0	0	0	0	WBGene00007633
C16D2.2	0	0	0	0	0	0	0	0	0	0	0	0	0	0	0	0	0	0	0	0	WBGene00195143
C16D2.3	0	0	0	0	0	0	0	0	0	0	0	0	0	0	0	0	0	0	0	0	WBGene00195144
C16D6.1	0	0	0	0	0	0	0	0	0	0	0	0	0	0	0	0	0	0	0	0	WBGene00007634
C16D6.2	0	0	0	0	0	0	1	0	0	0	0	0	0	0	0	1	0	0	0	0	WBGene00007635
C16D6.3	0	0	0	0	0	0	0	0	0	0	0	0	0	0	0	0	0	0	0	0	WBGene00007636
C16D9.1	0	0	0	0	0	0	0	0	0	0	0	0	0	0	0	0	0	0	0	0	WBGene00015857
C16D9.2	0	0	0	0	2	0	0	0	0	0	0	0	0	0	0	0	0	0	0	0	WBGene00004395
C16D9.3	0	0	0	0	0	0	0	0	0	0	0	0	0	0	0	0	0	0	0	0	WBGene00015858
C16D9.4	0	0	0	0	0	0	0	0	0	0	0	0	0	0	0	0	0	0	0	0	WBGene00015859
C16D9.5	0	0	0	0	0	0	0	0	0	0	0	0	0	0	0	0	0	0	0	0	WBGene00015860
C16D9.6	0	0	1	0	0	3	1	4	1	7	0	0	0	0	0	5	0	1	2	3	WBGene00015861
C16D9.7	0	0	0	0	0	0	0	0	0	0	0	0	0	0	0	0	0	0	0	0	WBGene00015862
C16D9.8	0	0	0	0	0	0	0	0	0	0	0	0	0	0	0	0	0	0	0	0	WBGene00015863
C16D9.9	0	0	0	0	0	0	0	0	0	0	0	0	0	0	0	0	0	0	0	0	WBGene00015864
C16E9.1	0	0	0	0	0	0	0	0	0	0	0	0	0	0	0	0	0	0	0	0	WBGene00015865
C16E9.2	1	0	0	0	0	12	3	2	1	13	3	0	0	0	1	4	9	2	7	3	WBGene00015866
C16E9.4	0	0	0	0	0	0	0	0	0	0	0	0	0	0	0	0	0	0	0	0	WBGene00002123
C16H3.1	0	0	0	0	0	0	0	0	0	0	0	0	0	0	0	0	0	0	0	0	WBGene00015867
[truncated: 18,782 more rows]
